# Supplementary material for: The Effect of Eccentric vs. Traditional Resistance Exercise on Muscle Strength, Body Composition, and Functional Performance in Older Adults: A Systematic Review With Meta-Analysis
Source: Front Sports Act Living. 2022 Apr 13;4:873718. doi: 10.3389/fspor.2022.873718 (PMC9045400; doi:10.3389/fspor.2022.873718)
Supplement: Supplementary file 1 [file Data_Sheet_1.xlsx]

## Sheet: 01_PapersStage1
Identifier	Title	Journal	Volume	Number	Month	Pages	Year	Address	Note	URL	Booktitle	Chapter	Edition	Series	Editor	Publisher	ReportType	Howpublished	Institution	Organizations	School	Annote	Custom1	Custom2	Custom3	Custom4	Custom5
Otto1975	[Visual training of partial blinds due to organic lesions (author's transl)].	Klinische Monatsblatter fur Augenheilkunde	166	4	apr	458--478	1975																The immanent sense of optic orientation in space is related to the unchangeable line of principal visual direction and its collaterals. Therefore in patients with loss of central vision due to organic lesion the orientation in space is impaired as well. as a result of a vicious circle of indistinct vision, eccentric fixation and suppresion of foveal perception. By a systematic training the normal…		Adolescent,Adult,Aged,Blindness,Female,Fixation, Ocular,Humans,Macular Degeneration,Male,Methods,Middle Aged,Orientation,Reading,Retinal Degeneration,Retinal Diseases,Space Perception,Vision Disorders,Vision Tests,etiology,rehabilitation
Holocomb1976	Eccentric viewing training.	Journal of the American Optometric Association	47	11	nov	1438--1443	1976																Eccentric viewing training seeks to train subjects to utilize a paramacular area of the retina for seeing when the macular area is damaged. The present paper demonstrates two techniques for training eccentric viewing, as well as a method for measuring impovement in the use of the paramacular area. Both techniques are inexpensive, can be administered by a technician, and do not require an extensiv…		Adult,Afterimage,Aged,Fixation, Ocular,Humans,Male,Methods,Middle Aged,Photic Stimulation,Scotoma,Time Factors,Visual Acuity,methods,rehabilitation
McGlynn1979	Effect of electromyographic feedback and static stretching on artificially induced muscle soreness.	American journal of physical medicine	58	3	jun	139--148	1979																Thirty-six male subjects aged 18 to 26 years were assigned at random to one of three treatment groups: biofeedback, static stretch, and control. Muscle soreness was produced in all subjects by an 80% maximal eccentric contraction of the biceps brachii. The subjects in the biofeedback group applied auditory electromyographic (EMG) feedback at 6, 25, 30, 49, and 54 hours after the exercise, and the…		Adolescent,Adult,Arm,Biofeedback, Psychology,Electromyography,Humans,Male,Muscle Contraction,Muscle Hypotonia,Muscle Rigidity,Pain Management,methods,therapy
Pestalozzi1979	[Better prognosis for amblyopics by means of full prismatic correction after monocular treatment (author's transl)].	Klinische Monatsblatter fur Augenheilkunde	175	3	sep	385--393	1979																Binocular training with full prismatic correction after the monocular therapy by occlusion brings a further improvement of the visual acuity as well as shown in a study of 29% (138 cases) of 469 selected cases with binocular problems and 43% (260 cases) of about 600 unselected cases of squint actually in treatment in the practice and orthoptic years the strength of the prisms is determined with t…		Adolescent,Amblyopia,Child,Child, Preschool,Eyeglasses,Fixation, Ocular,Humans,Infant,Orthoptics,Strabismus,Visual Acuity,methods,therapy
Zihl1982	Restitution of visual field in patients with damage to the geniculostriate visual pathway.	Human neurobiology	1	1	mar	5--8	1982																Previous experiments have investigated the effect of specific practice on partially blinded monkeys after striate cortex lesions. Similar procedures were adapted for patients suffering homonymous field defects due to geniculostriate damage. Both methods, light detection and saccadic localization, led to an enlargement of the visual field. The amount of this enlargement depended on the eccentricit…		Adult,Aged,Cerebrovascular Disorders,Fixation, Ocular,Hemianopsia,Humans,Middle Aged,Saccades,Scotoma,Sensory Thresholds,Surgical Procedures, Operative,Vision Disorders,Visual Fields,adverse effects,complications,etiology,therapy
Friden1983	M.; Ekblom	B."	Adaptive response in human skeletal muscle subjected to prolonged eccentric training.	International journal of sports medicine	4	3	aug	177--183	1983																The peripheral adaptation process associated with repeating eccentric training over a longer period of time was studied in m. vastus lateralis of eleven healthy males aged 24 +/- 4 years. The maximal dynamic concentric muscle strength was only slightly improved after 8 weeks of training. However, eccentric work capacity was dramatically increased (375%). A maximal eccentric stint immediately afte…		Adaptation, Physiological,Adult,Humans,Knee,Male,Mitochondria, Muscle,Muscle Contraction,Muscles,Oxygen Consumption,Pain,Physical Education and Training,Time Factors,etiology,physiology,ultrastructure
Messerli1983	Clinical determinants and consequences of left ventricular hypertrophy.	The American journal of medicine	75	3A	sep	51--56	1983																The left ventricle adapts to an increased afterload such as that produced by arterial hypertension with concentric left ventricular hypertrophy. However, this adaptive process can be modified by a variety of physiologic and pathophysiologic states. Progressive aging, black race, and perhaps disorders with an increased sympathetic outflow seem to accelerate left ventricular hypertrophy. Obesity an…	the increase in myocardial mass lowers coronary reserve and enhances cardiac oxygen requirements. Thus	the presence of left ventricular hypertrophy has to be considered as an ominous sign rather than as a benign adaptive process."		African Continental Ancestry Group,Aging,Blood Pressure,Cardiac Output,Cardiomegaly,Catecholamines,Coronary Disease,Electrocardiography,Humans,Hypertension,Isometric Contraction,Mitral Valve Prolapse,Obesity,Risk,complications,etiology,physiology,physiopathology
Newham1983	Large delayed plasma creatine kinase changes after stepping exercise.	Muscle & nerve	6	5	jun	380--385	1983																Muscle changes have been examined in 16 normal subjects (eight female) after both a 20-minute and a prolonged step test. Stepping differs from most exercise tests in that it involves eccentric contractions (negative work) in which the active muscle is lengthened. Plasma creatine kinase (CK), muscle force, contractile properties, and tenderness in the quadriceps were measured for up to 9 days afte…		Adult,Creatine Kinase,Female,Humans,Male,Middle Aged,Muscle Contraction,Physical Exertion,blood
Newham1983a	Ultrastructural changes after concentric and eccentric contractions of human muscle.	Journal of the neurological sciences	61	1	sep	109--122	1983																Four normal subjects performed a 20 min step test using a step of the same relative height. During the test the quadriceps muscle of one leg contracted concentrically throughout by stepping up, while the contralateral muscle contracted eccentrically by controlling the step down. Thus both muscles performed the same amount of work. Three subjects had bilateral needle biopsies just prior to exercis…		Adult,Biomechanical Phenomena,Biopsy,Female,Humans,Male,Microscopy, Electron,Middle Aged,Muscle Contraction,Muscles,Muscular Diseases,Myofibrils,Physical Exertion,metabolism,pathology,ultrastructure
Newham1983b	Pain and fatigue after concentric and eccentric muscle contractions.	Clinical science (London, England : 1979)	64	1	jan	55--62	1983																1. Normal subjects performed a step test in which the quadriceps of one leg contracted concentrically while the contralateral muscle contracted eccentrically. 2. Maximal voluntary force and the force: frequency relationship were altered bilaterally as a result of the exercise, the changes being greater in the muscle which had contracted eccentrically. Recovery occurred over 24 h. 3. Electromyogra…		Adult,Biomechanical Phenomena,Electric Stimulation,Electromyography,Fatigue,Female,Humans,Leg,Male,Middle Aged,Muscle Contraction,Muscles,Pain,Physical Exertion,Time Factors,etiology,physiology
Perry1983	Anatomy and biomechanics of the hindfoot.	Clinical orthopaedics and related research		177		9--15	1983																Hindfoot function involves eccentric loading of the subtalar joint and repetitive strain of the calcaneal soft tissues. Both are induced by the serial pattern of foot support. The subtalar joint experiences rapid eversion following heel strike and subsequent inversion during terminal stance. Although these actions reduce the rotatory strain on the ankle joint, they also challenge the local soft t…		Ankle,Ankle Joint,Biomechanical Phenomena,Humans,Locomotion,Running,Tarsal Bones,Tarsal Joints,Tendons,anatomy & histology,physiology
Clement1984	Achilles tendinitis and peritendinitis: etiology and treatment.	The American journal of sports medicine	12	3		179--184	1984																One hundred nine runners were treated conservatively without immobilization for overuse injury to the Achilles tendon. Treatment strategies were directed toward rehabilitation of the gastrocnemius/soleus muscle-tendon unit, control of inflammation and pain, and control of biomechanical parameters. One fair, 12 good, and 73 excellent results were reported, with a mean recovery time of 5 weeks. Fol…		Achilles Tendon,Adolescent,Adult,Athletic Injuries,Biomechanical Phenomena,Female,Humans,Male,Middle Aged,Muscles,Retrospective Studies,Rotation,Running,Tendinopathy,etiology,injuries,physiopathology,therapy
Andersen1985	Dynamic knee extension as model for study of isolated exercising muscle in humans.	Journal of applied physiology (Bethesda, Md. : 1985)	59	5	nov	1647--1653	1985																In an attempt to approach a system of isolated exercising muscle in humans, a model has been developed that enables the study of muscle activity and metabolism over the quadriceps femoris (QF) muscles while the rest of the body remains relaxed. The simplest version includes the subject sitting on a table with a rod connecting the ankle and the pedal arm of a bicycle ergometer placed behind the su…		Adult,Electromyography,Humans,Knee,Lactates,Male,Middle Aged,Movement,Muscle Contraction,Muscles,Oxygen Consumption,Physical Exertion,blood,metabolism,physiology
Mancia1985	Reflex cardiovascular regulation in humans.	Journal of cardiovascular pharmacology	7 Suppl 3			S152--9	1985																Although studies of the cardiovascular control exerted by arterial baroreceptors in man are limited by technical and ethical problems, the variable-pressure neck-chamber technique has provided a considerable amount of information about this topic. This paper focuses on the carotid baroreceptor reflex as evaluated by studies using the neck-chamber technique and examines this control in a number of…		Blood Pressure,Cardiovascular Physiological Phenomena,Coronary Circulation,Heart Rate,Humans,Hypertension,Physical Exertion,Pressoreceptors,Reflex,Renin,blood,physiology,physiopathology
Zihl1985	Visual field recovery from scotoma in patients with postgeniculate damage. A review of 55 cases.	Brain : a journal of neurology	108 ( Pt 2		jun	335--365	1985																A group of 55 patients with homonymous field defects related to vascular or traumatic postgeniculate damage were trained by locating light targets presented within their blind field region. This systematic treatment led, in the majority of patients, to an enlargement of the visual field. Recovery depended on specific practice. Control experiments showed that field enlargement cannot be explained …		Adult,Aged,Cerebral Infarction,Color Perception,Corpus Striatum,Female,Form Perception,Geniculate Bodies,Humans,Male,Middle Aged,Reading,Remission, Spontaneous,Scotoma,Visual Field Tests,Visual Fields,complications,etiology,injuries,physiopathology,therapy
Bohannon1986	Results of manual resistance exercise on a manifesting carrier of Duchenne muscular dystrophy. A case report.	Physical therapy	66	6	jun	973--975	1986																This case report is about a manifesting carrier of Duchenne muscular dystrophy who participated in a program of maximal concentric-eccentric manual resistance exercise three days each week for 12 weeks. As a consequence, she achieved mean strength increases exceeding 28% bilaterally. She also ceased falling, which she had been experiencing several times a month before beginning the exercise progr…		Exercise Therapy,Female,Heterozygote,Humans,Middle Aged,Muscle Contraction,Muscular Dystrophies,Time Factors,genetics,physiopathology,rehabilitation
Jones1986	Experimental human muscle damage: morphological changes in relation to other indices of damage.	The Journal of physiology	375		jun	435--448	1986																The effects of eccentric exercise have been examined in human calf and biceps muscles. Release of muscle creatine kinase and uptake of technetium pyrophosphate have been followed for up to 20 days after the exercise and the results are related to the morphological changes seen in needle biopsy samples. The response to exercise was variable, all subjects developing pain and tenderness in the exerc…		Adult,Biopsy,Creatine Kinase,Diphosphates,Humans,Middle Aged,Muscles,Physical Exertion,Technetium,Technetium Tc 99m Pyrophosphate,Time Factors,blood,injuries,pathology
Nilsson1986	Visual rehabilitation of patients with advanced diabetic retinopathy. A follow-up study at the Low Vision Clinic, Department of Ophthalmology, University of Link\oping."	Documenta ophthalmologica. Advances in ophthalmology	62	4	may	369--382	1986																Seventy-nine patients with advanced diabetic retinopathy were subjected to a full range of low vision rehabilitation measures and followed for an average of 3.6 years at the Low Vision Clinic. They were provided with high power optical aids, followed by educational training in the use of such aids and of residual vision, including the utilization of peripheral retina by means of eccentric viewing…		Adult,Aged,Diabetic Retinopathy,Female,Humans,Male,Middle Aged,Newspapers as Topic,Reading,Television,Vision, Ocular,Visual Acuity,Work Capacity Evaluation,physiopathology,rehabilitation
Nilsson1986a	Rehabilitation of the visually handicapped with advanced macular degeneration. A follow-up study at the Low Vision Clinic, Department of Ophthalmology, University of Link\oping."	Documenta ophthalmologica. Advances in ophthalmology	62	4	may	345--367	1986																Hundred-and-twenty patients with advanced macular degeneration (senile, disciform, and hereditary forms), which could not be helped in a satisfactory way by simple magnifying aids, were studied for an average of 5 years (a minimum of 3 years), during which they had access to a full range of low vision rehabilitation measures including advanced optical aids and educational methods for training in …		Adult,Aged,Disabled Persons,Eyeglasses,Female,Humans,Macular Degeneration,Male,Middle Aged,Reading,Vision, Ocular,Visual Acuity,physiopathology,rehabilitation
Peli1986	Control of eye movement with peripheral vision: implications for training of eccentric viewing.	American journal of optometry and physiological optics	63	2	feb	113--118	1986																A review of peripheral visual control of eye movements suggests that such control may be easier if the direction of the extrafoveal locus used is orthogonal rather than radial to the direction of target motion. When the extrafoveal locus lies parallel (radial) to the direction of target or eye motion, artificial feedback is usually required to avoid reflexive foveation. These findings have import…		Aged,Eye Movements,Fovea Centralis,Humans,Macular Degeneration,Retina,Saccades,Scotoma,Vision Disorders,physiopathology,rehabilitation
Timberlake1986	Reading with a macular scotoma. I. Retinal location of scotoma and fixation area.	Investigative ophthalmology & visual science	27	7	jul	1137--1147	1986																To investigate how patients with macular scotomas use residual functional retinal areas to inspect visual detail, a scanning laser ophthalmoscope (SLO) was used to map the retinal locations of scotomas and areas used to fixate. Three patients with dense macular scotomas of at least 20 months duration and with no explicit low vision training were tested. SLO stimuli were produced by computer modul…		Adult,Aged,Female,Fixation, Ocular,Humans,Lasers,Macula Lutea,Middle Aged,Ophthalmoscopy,Reading,Retinal Diseases,Scotoma,physiopathology
Benson1987	Left ventricular geometry and function in adults with Ebstein's anomaly of the tricuspid valve.	Circulation	75	2	feb	353--359	1987																We postulated that the abnormal shape, size, and function of the right heart and adjoining ventricular septum in adults with Ebstein's anomaly of the tricuspid valve might in turn alter the shape and function of the left ventricle. Seven adult patients with uncomplicated Ebstein's anomaly were studied. Left ventricular geometry was determined by two-dimensional echocardiography. Left ventricular …		Adolescent,Adult,Ebstein Anomaly,Echocardiography,Exercise Test,Female,Heart,Heart Rate,Heart Ventricles,Humans,Male,Middle Aged,Myocardial Contraction,Radionuclide Angiography,Stroke Volume,pathology,physiopathology
Darr1987	Exercise-induced satellite cell activation in growing and mature skeletal muscle.	Journal of applied physiology (Bethesda, Md. : 1985)	63	5	nov	1816--1821	1987																The time course and extent of satellite cell activation were studied in the soleus (m-SOL) and extensor digitorum longus (m-EDL) muscles of untrained growing and mature rats after a single bout of prolonged eccentric treadmill running. At 24, 48, 72, and 120 h postexercise, satellite cell mitotic activity was quantitated in autoradiographs of whole-fiber segments after injection of [3H]thymidine.…		Aging,Animals,Male,Mitosis,Muscles,Necrosis,Physical Exertion,Rats,Rats, Inbred Strains,pathology,physiology
Myler1987	Recurrence after coronary angioplasty.	Catheterization and cardiovascular diagnosis	13	2		77--86	1987																Recurrence (restenosis) after coronary angioplasty has undermined the initial success of the procedure and has compromised, to some extent, the attractiveness of the technique in the treatment of ischemic heart disease. Assessment of recurrence predictors has been problematic due to lack of coordination of angioplasty recurrence research and includes: incomplete angiographic documentation, variat…	to ignore or minimize these findings or resist further evaluation (because of the ease and safety of performing repeat angioplasty) is to deny the opportunity to understand the mechanisms and favorably affect the incidence of recurrence. This review concludes with two major implications of the restenosis research: certain clinical	technical	and pharmacologic factors	if addressed
Newham1987	Repeated high-force eccentric exercise: effects on muscle pain and damage.	Journal of applied physiology (Bethesda, Md. : 1985)	63	4	oct	1381--1386	1987																Five women and three men (aged 24-43 yr) performed maximal eccentric contractions of the elbow flexors (for 20 min) on three occasions, spaced 2 wk apart. Muscle pain, strength and contractile properties, and plasma creatine kinase (CK) were studied before and after each exercise bout. Muscle tenderness was greatest after the first bout and thereafter progressively decreased. Very high plasma CK …		Adult,Creatine Kinase,Female,Humans,Isometric Contraction,Male,Muscle Contraction,Muscles,Pain,Physical Education and Training,Physical Exertion,blood,enzymology,etiology,injuries
Round1987	Cellular infiltrates in human skeletal muscle: exercise induced damage as a model for inflammatory muscle disease?	Journal of the neurological sciences	82	1-3	dec	1--11	1987																The type and distribution of mononuclear cell infiltrates in muscle biopsies taken from 9 subjects at differing times after exercise in which the muscle is stretched (eccentric exercise) has been characterised. The appearances are compared to those seen in muscle from patients with inflammatory muscle disease. After exercise infiltrating cells were seen in perivascular, perimysial and endomysial …		Adult,Biopsy,Female,Humans,Leukocytes, Mononuclear,Male,Middle Aged,Models, Biological,Muscles,Myositis,Physical Exertion,pathology
Silber1987	Induction and circumvention of nitrate tolerance applying different dosage intervals.	The American journal of medicine	83	5	nov	860--870	1987																There is increasing evidence that constant nitrate plasma levels, as induced by at least three-times-daily ingestions of isosorbide dinitrate in sustained-release form, lead to an attenuation or even complete loss of the anti-ischemic effects (nitrate tolerance). Therefore, the dependence of tolerance development on dosage intervals according to once-daily and twice-daily ingestions was assessed.…		Angina Pectoris,Coronary Disease,Delayed-Action Preparations,Drug Administration Schedule,Drug Tolerance,Electrocardiography,Exercise Test,Hemodynamics,Humans,Isosorbide Dinitrate,Middle Aged,Physical Exertion,Time Factors,administration & dosage,blood,drug effects,drug therapy
Clarkson1988	Exercise-induced muscle damage, repair, and adaptation in old and young subjects.	Journal of gerontology	43	4	jul	M91--6	1988																This study examined exercise-induced muscle damage, repair, and adaptation in 10 college age women and 10 women over age 60. On two sessions spaced 7 days apart, subjects performed an eccentric exercise of the forearm flexors consisting of 24 muscle actions at an intensity of 115% of isometric strength. Serum creatine kinase activity, flexed and relaxed elbow joint angles, and muscle pain were as…		Adaptation, Physiological,Adult,Aged,Aging,Creatine Kinase,Female,Humans,Middle Aged,Muscle Contraction,Muscles,Muscular Diseases,Physical Exertion,Regeneration,Time Factors,blood,etiology,physiology,physiopathology
FIELDING1988	ECCENTRIC EXERCISE INCREASES LOSS OF 3-METHYLHISTIDINE AND NITROGEN IN ELDERLY MEN	FASEB JOURNAL	2	5		A1085--A1085	1988
Milgrom1988	An analysis of the biomechanical mechanism of tibial stress fractures among Israeli infantry recruits. A prospective study.	Clinical orthopaedics and related research		231	jun	216--221	1988																The biomechanical mechanism of tibial diaphyseal stress fractures was studied prospectively in a group of 286 Israeli recruits. Before training each recruit had roentgenograms taken of his tibiae. Measurements of total tibial and cortical widths in the anteroposterior (AP) and mediolateral planes were made on these roentgenograms at two levels: at the point of the narrowest tibial width on AP roe…		Adult,Biomechanical Phenomena,Humans,Male,Middle Aged,Military Personnel,Prospective Studies,Radionuclide Imaging,Regression Analysis,Stress, Mechanical,Tensile Strength,Tibial Fractures,diagnostic imaging,physiopathology
Nilsson1988	Visual rehabilitation of patients with advanced stages of glaucoma, optic atrophy, myopia or retinitis pigmentosa.	Documenta ophthalmologica. Advances in ophthalmology	70	4	dec	363--383	1988																Ninety-six patients with advanced stages of glaucoma, optic atrophy, myopia or retinitis pigmentosa (RP) who could not manage with ordinary spectacles or simple magnifying aids were taken care of at the Low Vision Clinic for rehabilitation and followed for an average of 3.6 years (the glaucoma group) up to an average of 6.0 years (the optic atrophy group). They were given high power optical aids …	RP) per series of visits. With aids and educational training	the mean visual acuity improved on the first series of visits from 0.31 to 0.60 for the glaucoma group	from 0.19 to 0.70 for the optic atrophy group	from 0.12 to 0.68 for the myopes and from 0.35 to 0.52 for the RP group. After the last series of visits acuity was still as good as 0.51
Vallbracht1988	Recurrent restenosis after transluminal coronary angioplasty--dilatation or surgery?	European heart journal	9 Suppl C		mar	7--10	1988																In a total of 333 patients who had undergone a first successful transluminal coronary angioplasty (TCA), restenosis occurred in 17% (follow-up angiography was performed in 94% of patients). The restenosis rate was higher in bypass stenoses (45%) and re-opened vessels (54%). Repeat dilatation of restenoses had a high acute success rate (93%) and only few severe complications (2%). In this group th…		Aged,Angioplasty, Balloon,Coronary Disease,Exercise Test,Female,Humans,Male,Recurrence,Risk Factors,therapy
Ciampricotti1989	Unstable angina, myocardial infarction and sudden death after an exercise stress test.	International journal of cardiology	24	2	aug	211--218	1989																We performed coronary angiography within 95 minutes of the onset of symptoms in seven patients with an acute coronary event after an exercise stress test. The test was normal in six patients. Previous angiography in four patients revealed no evident or moderate obstructive coronary arterial disease. After the test, unstable angina developed in two patients, acute myocardial infarction in four and…		Adult,Aged,Angina Pectoris,Angina, Unstable,Cause of Death,Coronary Disease,Coronary Vasospasm,Death, Sudden,Electrocardiography,Exercise Test,Female,Humans,Male,Middle Aged,Myocardial Infarction,Netherlands,Nitroglycerin,Risk Factors,administration & dosage,drug therapy,mortality
Ciampricotti1989a	Myocardial infarction and sudden death after sport: acute coronary angiographic findings.	Catheterization and cardiovascular diagnosis	17	4	aug	193--197	1989																Thirteen patients, seven with acute myocardial infarction and six survivors of sudden death after sport, underwent coronary angiography within a mean of 104 min after the onset of symptoms. The admission electrocardiogram showed transmural myocardial ischemia in all patients. The ischemia-related vessel was occluded in all cases of sudden death and in three cases of acute myocardial infarction. R…		Adult,Aged,Coronary Angiography,Coronary Disease,Coronary Thrombosis,Coronary Vasospasm,Death, Sudden,Female,Humans,Male,Middle Aged,Myocardial Infarction,Resuscitation,Risk Factors,Smoking,Sports,adverse effects,diagnostic imaging,genetics
Gray1989	Percent Decline in Peak Torque Production during Repeated Concentric and Eccentric Contractions of the Quadriceps Femoris Muscle.	The Journal of orthopaedic and sports physical therapy	10	8		309--314	1989																The purpose of this study was to document the difference between eccentric and concentric fatigue of the quadriceps femoris muscle during a maximal effort 40 repetition bout at 180 degrees /sec. Sixteen female volunteers aged 22 to 32 years were tested twice, at least 7 days apart. The left lower extremity of each subject was used during testing on the Kin-Com(R) dynamometer. Subjects were tested…
Hess1989	Coronary vasomotor tone during static and dynamic exercise.	European heart journal	10 Suppl F		nov	105--110	1989																Coronary vasomotion is an important determinant of myocardial perfusion in patients with angina pectoris, and it influences not only normal but also stenotic coronary arteries. The ability of a stenotic coronary artery to change its size is dependent on the presence of a normal musculo-elastic wall segment within the stenosis (i.e., eccentric stenosis). Coronary vasoconstriction of normal and ste…		Angina Pectoris,Coronary Angiography,Coronary Circulation,Coronary Disease,Coronary Vessels,Humans,Middle Aged,Muscle Tonus,Nitroglycerin,Physical Exertion,Vascular Resistance,Vasodilation,diagnostic imaging,drug effects,pharmacology,physiology,physiopathology
Jensen1989	Evaluation of eccentric exercise in treatment of patellar tendinitis.	Physical therapy	69	3	mar	211--216	1989																The purpose of this study was to analyze the effects of a quadriceps femoris muscle eccentric training program on strength gain in patients with patellar tendinitis. The effect of an eight-week eccentric exercise program on quadriceps femoris muscle work was evaluated in four groups of subjects--two groups of normal" (healthy) subjects and two groups of patients with patellar tendinitis. All four…	but only two groups--one group of normal subjects (N-A) and one group of subjects with tendinitis (T-A)--received additional eccentric training on an eccentric isokinetic dynamometer. The eccentric quadriceps femoris muscle work ratio (involved limb/uninvolved limb x 100) was used to quantify strength in the N-A and T-A Groups. Pain ratings were recorded for subjects with tendinitis before and af…	however	showed a trend toward increasing eccentric quadriceps femoris muscle work capacity over the eight-week training period. As pain ratings in the T-A Group increased	work ratios decreased. We concluded that eccentric exercise may be an effective treatment for patellar tendinitis
Johannsen1989	Exercise-induced knee joint laxity in distance runners.	British journal of sports medicine	23	3	sep	165--168	1989																The objectives of this study were to evaluate the effect of exercise on knee joint laxity. If exercise induced laxity is physiological, incorporation of this quality into a ligament replacement material would be indicated. Twenty recreational long distance runners average age 41 (range 24 to 50 yr) were tested before and immediately after 30 minutes of running. Using a computerized goniometer typ…		Adult,Biomechanical Phenomena,Female,Humans,Joint Instability,Knee Injuries,Male,Middle Aged,Running,etiology,injuries,physiopathology
Swan1989	Cardiac dimensions and physical profile of masters level swimmers.	The Journal of sports medicine and physical fitness	29	1	mar	97--103	1989																Physical characteristics, physical activity patterns and cardiac dimensions of 18 men and 13 women masters swimmers were measured. Subjects consisted of swimminers aged 30-78 years who were competing in a regional invitational swim meet. Anthropometric measures for height, weight, body surface area (BSA), and skinfold thickness indicated no deviation from age or gender characteristics found in th…		Adult,Age Factors,Aged,Cardiomegaly,Female,Humans,Male,Middle Aged,Myocardium,Skinfold Thickness,Swimming,etiology,pathology
Wild1989	The influence of the learning effect on automated perimetry in patients with suspected glaucoma.	Acta ophthalmologica	67	5	oct	537--545	1989																The influence of the learning effect on the outcome of automated perimetry was studied as a function of eccentricity. The same comprised 20 patients with suspected glaucoma who were all naive to automated perimetry. Visual field examination of the right eye followed by that of the left eye was undertaken on each of three successive days and after a further interval of 12 days using a customized f…		Clinical Competence,Female,Glaucoma,Humans,Male,Middle Aged,Visual Field Tests,Visual Fields,diagnosis,methods
Yamazaki1989	[The evaluation of left ventricular eccentric hypertrophy by 201Tl-myocardial scintigraphy].	Kaku igaku. The Japanese journal of nuclear medicine	26	3	mar	409--418	1989																In order to elucidate the mechanism of left ventricular eccentric hypertrophy in conditions of volume overload, Tl-201 myocardial scintigraphy was performed patients with aortic valve regurgitation and mitral valve regurgitation. There was a good relationship between the severity of Tl-defects, as determined by Tl-201 myocardial scintigraphy, and the changes in the T wave on the ECG on the one ha…		Adult,Aged,Aortic Valve Insufficiency,Cardiomegaly,Exercise Test,Female,Heart,Humans,Male,Middle Aged,Mitral Valve Insufficiency,Thallium Radioisotopes,Tomography, Emission-Computed,complications,diagnostic imaging,etiology
Bassey1990	A new method for measuring power output in a single leg extension: feasibility, reliability and validity.	European journal of applied physiology and occupational physiology	60	5		385--390	1990																A method is described for measuring the explosive power of the leg in extension which has been found safe and acceptable for all age groups and levels of physical capability. The extension movement takes 0.25-0.40 s in a push through 0.165 m against a flat pedal. At the end of the push the leg is fully extended. The movement is made seated so that the forces are contained between the buttocks and…		Adult,Aged,Aged, 80 and over,Aging,Biomechanical Phenomena,Equipment and Supplies,Evaluation Studies as Topic,Feasibility Studies,Humans,Leg,Methods,Middle Aged,Muscles,Physical Exertion,Sex Characteristics,physiology
Bernardes1990	[Exercise 2D-Doppler echocardiography, for the evaluation of aortic valve prostheses].	Revista portuguesa de cardiologia : orgao oficial da Sociedade Portuguesa de Cardiologia = Portuguese journal of cardiology : an official journal of the Portuguese Society of Cardiology	9	7-8		613--618	1990																STUDY OBJECTIVE: Exercise evaluation of eccentric monocuspid aortic prosthetic valves. DESIGN: Prospective study, using 2D Doppler echocardiography to analyse resting and exercise aortic flow patterns. SETTING: Laboratory of Echocardiography at Santa Marta Hospital. PATIENTS: Sequential sample of 28 patients with aortic prosthesis (19 Bjork-Shiley and 9 Hall-Kaster), without evidence of either ca…		Adult,Aged,Aortic Valve,Echocardiography, Doppler,Exercise Test,Female,Heart Valve Prosthesis,Humans,Male,Middle Aged,Rest,diagnostic imaging
Blake1990	Relation of obesity, high sodium intake, and eccentric left ventricular hypertrophy to left ventricular exercise dysfunction in essential hypertension.	The American journal of medicine	88	5	may	477--485	1990																PURPOSE: To elucidate determinants of abnormal left ventricular functional responses to exercise in hypertensive patients. PATIENTS AND METHODS: One hundred twenty-seven patients with uncomplicated essential hypertension were studied by rest and exercise radionuclide angiography and by echocardiography at rest. RESULTS: The 24 patients with subnormal left ventricular ejection fraction at peak exe…		Cardiomegaly,Cineangiography,Echocardiography,Exercise Test,Female,Heart,Humans,Hypertension,Male,Middle Aged,Multivariate Analysis,Myocardial Contraction,Obesity,Physical Exertion,Radionuclide Angiography,Sex Factors,Sodium, Dietary,Stroke Volume,complications,pharmacology,physiology,physiopathology
Cannon1990	Acute phase response in exercise: interaction of age and vitamin E on neutrophils and muscle enzyme release.	The American journal of physiology	259	6 Pt 2	dec	R1214--9	1990																Several host defense responses and metabolic reactions that occur during infection have been observed after exercise. We hypothesized that these reactions, known as the acute phase response	contribute to the breakdown and clearance of damaged tissue after exercise. This hypothesis was tested with 21 male volunteers representing two ranges of age (22-29 and 55-74 yr), who ran downhill on an inclined treadmill to accentuate damaging eccentric muscular contractions. The subject groups were further divided in a double-blind placebo-controlled protocol, which examined the influence of 48…		Acute-Phase Reaction,Adult,Aging,Creatine Kinase,Exercise,Humans,Leukocyte Count,Lipid Peroxides,Male,Muscles,Neutrophils,Superoxides,Vitamin E,blood,enzymology,metabolism,pathology,physiology,physiopathology
Ciampricotti1990	Clinical characteristics and coronary angiographic findings of patients with unstable angina, acute myocardial infarction, and survivors of sudden ischemic death occurring during and after sport.	American heart journal	120	6 Pt 1	dec	1267--1278	1990																The clinical characteristics and coronary angiographic findings of 42 well-conditioned subjects with an acute ischemic event related to sport are reported. Five patients had unstable angina, 25 had acute myocardial infarction (AMI), and 12 were resuscitated victims of sudden ischemic death. Twenty-two events occurred during sport (group A) and 20 after sport (group B). There were two women and 40…		Adult,Angina, Unstable,Coronary Angiography,Coronary Disease,Coronary Thrombosis,Death, Sudden,Electrocardiography,Female,Humans,Male,Middle Aged,Myocardial Infarction,Netherlands,Resuscitation,Risk Factors,Sports,diagnostic imaging,epidemiology
Dedrick1990	The effects of eccentric exercise on motor performance in young and older women.	European journal of applied physiology and occupational physiology	60	3		183--186	1990																The purpose of the present study was to determine if old individuals show a greater exercise-induced decrement in motor performance and slower recovery compared to young individuals. Ten college-age women (23.6 years) and ten older women (67.4 years) performed an exercise consisting of 24 eccentric actions of the forearm flexors. In young subjects, eccentric exercise is known to produce repairabl…		Adult,Aged,Aging,Exercise,Female,Humans,Middle Aged,Motor Activity,Muscles,physiology
FernandezdeAlmeida1990	[Death in exercise test: immediate angiographic findings in 2 cases].	Arquivos brasileiros de cardiologia	55	6	dec	375--377	1990																We present two cases of mortality during a stress test after which coronary arteriography was performed after the acute event. In both patients, left coronary arteries presented eccentric lesions with irregular bordes and intraluminal lucencies. We have discussed the probable pathophysiologic mechanisms involved in view of the angiographic findings. We concluded that the cracking of the plaque wa…		Coronary Angiography,Coronary Disease,Death, Sudden,Exercise Test,Humans,Male,Middle Aged,adverse effects,etiology,physiopathology
Kuliev1990	[Features of clinical manifestations of intermediate coronary syndrome in relation to the status of the coronary bed].	Kardiologiia	30	9	sep	52--54	1990																Uni- and multifactorial analyses of clinical and angiographic findings were made in 32 patients with coronary heart disease concurrent with the intermediate coronary syndrome and 34 patients with progressive angina pectoris. A complex of clinical and angiographic signs was defined, which enabled these groups of patients to be differentiated. Exercise tolerance was the same in the two groups and r…		Adult,Aged,Angina Pectoris,Angiography,Coronary Angiography,Coronary Disease,Diagnosis, Differential,Humans,Male,Middle Aged,Syndrome,diagnosis,diagnostic imaging
Pedersen1990	Group training in parkinsonism: quantitative measurements of treatment.	Scandinavian journal of rehabilitation medicine	22	4		207--211	1990																Ten patients with mild to moderate parkinsonism were tested before and after a 12-week training program. Strength was tested with simultaneous EMG registration in the ankle flexors at different angular velocities using a modified Cybex II equipment. Peak Torque (pT), Torque area (Ta) and Emg area (iEMGa) for the eccentric and concentric contractions were calculated. Quotients-q (Ta)/(iEMG) for ev…		Aged,Exercise Therapy,Female,Gait,Group Processes,Humans,Male,Muscle Contraction,Parkinson Disease,Physical Therapy Modalities,methods,rehabilitation
Stauber1990	Extracellular matrix disruption and pain after eccentric muscle action.	Journal of applied physiology (Bethesda, Md. : 1985)	69	3	sep	868--874	1990																Pain, stiffness, and indicators of muscle damage occur at different times after eccentric muscle action. After a single bout of maximal resisted lengthening of the elbow flexors, elbow position, pain perception, and indicators of cellular damage were measured. Immediately postexercise, a significant decrease in resting muscle length was observed that continued to 48 h. At this time, an increase i…		Adult,Aged,Antibodies, Monoclonal,Biopsy,Chondroitin Sulfates,Exercise,Extracellular Matrix,Female,Humans,Immunohistochemistry,Male,Muscles,Myositis,Pain,Proteoglycans,injuries,metabolism,pathology,physiopathology
Vandervoort1990	Eccentric knee strength of elderly females.	Journal of gerontology	45	4	jul	B125--8	1990																This study compared the strength of the knee extension and flexion muscles in groups of young and elderly women under two conditions: eccentric exercise in which the muscles were lengthened while subjects tried to resist an external force, versus concentric contractions in which the muscles shortened. Twenty-six females, aged 20 to 29 (Mean 25 +/- 3 SD), and 26 elderly women, aged 66 to 89 (Mean …		Adult,Aged,Aging,Female,Humans,Knee Joint,Muscle Contraction,Physical Exertion,physiology
Cannon1991	Acute phase response in exercise. II. Associations between vitamin E, cytokines, and muscle proteolysis.	The American journal of physiology	260	6 Pt 2	jun	R1235--40	1991																Cytokines such as interleukin 1 (IL-1), tumor necrosis factor-alpha (TNF-alpha), and interleukin 6 (IL-6) mediate a variety of host responses to trauma and infection, including skeletal muscle proteolysis. This investigation assesses the influence of damaging eccentric exercise on in vitro production and plasma concentrations of cytokines and their relationship to muscle protein breakdown. In a d…		Acute-Phase Reaction,Adult,Aged,Aging,Blood Cell Count,Cytokines,Dinoprostone,Double-Blind Method,Exercise,Humans,Interleukin-1,Interleukin-6,Leukocytes,Male,Methylhistidines,Muscles,Proteins,Radioimmunoassay,Tumor Necrosis Factor-alpha,Vitamin E,blood,cytology,metabolism,physiology,physiopathology,urine
Ciccone1991	Effects of ultrasound and trolamine salicylate phonophoresis on delayed-onset muscle soreness.	Physical therapy	71	9	sep	666--668	1991																The purpose of this study was to determine the effects of ultrasound and phonophoresis using an anti-inflammatory-analgesic cream (trolamine salicylate) on delayed-onset muscle soreness (DOMS). Repeated eccentric contractions were used to induce DOMS in the elbow flexors of 40 college-aged women. Subjects were then assigned randomly to one of four groups: (1) group 1 (n = 10) received sham ultras…		Adult,Anti-Inflammatory Agents, Non-Steroidal,Elbow Joint,Exercise,Female,Humans,Muscular Diseases,Pain Management,Phonophoresis,Range of Motion, Articular,Salicylates,Ultrasonic Therapy,administration & dosage,adverse effects,drug effects,physiology,therapeutic use,therapy
DUDLEY1991	INFLUENCE OF ECCENTRIC ACTIONS ON THE METABOLIC COST OF RESISTANCE EXERCISE	AVIATION SPACE AND ENVIRONMENTAL MEDICINE	62	7		678--682	1991																Maintenance of a low energy expenditure during exercise in space is important because of the confined environment of the space craft. Resistance exercise is receiving increased attention as an exercise countermeasure, and we have shown that training with concentric (con) and eccentric (ecc) muscle actions induces greater increases in strength than training with only con actions. This study determ…	n = 8) or with con and ecc (Group CON/ECC	n = 9) actions. Sets were separated by 3 min of rest and each was performed to failure by selecting a resistance that allowed performance of the prescribed number of repetitions (7 to 10). The net energy cost of exercise was estimated from oxygen consumption data that were obtained at rest before exercise	during exercise	and for 20 min of recovery. The total work performed during the con actions was about 290 J . kg-1 body weight for both groups. The energy cost for this work was about 3 x 10(-3) cal . J-1. The requirement for the CON/ECC group to also lower the load increased (p < 0.05) the energy cost 14%. These results indicate that con actions are mainly responsible for the metabolic cost of resistance exerci…
Dudley1991	Importance of eccentric actions in performance adaptations to resistance training.	Aviation, space, and environmental medicine	62	6	jun	543--550	1991																The inability of the exercises presently used during space-flight to maintain muscle strength and mass may reflect the absence of eccentric (ecc) muscle actions. This study examined the importance of ecc actions in performance adaptations to resistance training. Middle-aged males performed 4-5 sets of 6-12 repetitions (rep) per set of the leg press and leg extension exercises 2 d each week for 19…		Adaptation, Physiological,Adult,Aerospace Medicine,Exercise,Humans,Male,Muscles,Physical Education and Training,Reference Values,physiology
Evans1991	Muscle damage: nutritional considerations.	International journal of sport nutrition	1	3	sep	214--224	1991																Most exercise results in some skeletal muscle damage. However, unaccustomed exercise and/or eccentric exercise can cause extensive damage. This exercise-induced muscle damage causes a response that can be characterized by a cascade of metabolic events. Within 24 to 48 hours, delayed onset muscle soreness and weakness, the most obvious manifestations of the damage, peak. Increased circulating neut…		Adaptation, Physiological,Diet,Dietary Proteins,Exercise,Glycogen,Humans,Muscle Proteins,Muscles,Vitamin E,administration & dosage,injuries,metabolism,physiology,ultrastructure
Fielding1991	Enhanced protein breakdown after eccentric exercise in young and older men.	Journal of applied physiology (Bethesda, Md. : 1985)	71	2	aug	674--679	1991																The effects of eccentric exercise on whole body protein metabolism were compared in five young untrained [age 24 +/- 1 yr, maximal O2 uptake (VO2max) = 49 +/- 6 ml.kg-1.min-1] and five older untrained men (age 61 +/- 1 yr, VO2max = 34 +/- 2 ml.kg-1.min-1). They performed 45 min of eccentric exercise on a cycle ergometer at a power output equivalent to 80% VO2max (182 +/- 18 W). Beginning 5 days b…		Adult,Aging,Calorimetry,Carbon Dioxide,Creatine Kinase,Exercise,Humans,Kinetics,Leucine,Male,Methylhistidines,Middle Aged,Nitrogen,Oxygen Consumption,Proteins,metabolism,physiology,urine
Gagnon1991	Muscular mechanical energy expenditure as a process for detecting potential risks in manual materials handling.	Journal of biomechanics	24	3-4		191--203	1991																The problem of injuries in manual materials handling remains a big concern in industrialized countries. It has become imperative in occupational biomechanics to extend the analyses to all pertinent factors involved in working tasks and to adopt an experimental approach leading to the understanding of the relative demands imposed simultaneously on all body joints. The evaluation of joint muscular …		Accidents, Occupational,Adult,Biomechanical Phenomena,Elbow Joint,Energy Metabolism,Hip Joint,Humans,Middle Aged,Models, Biological,Muscles,Physical Exertion,Reference Values,Reproducibility of Results,Risk Factors,Shoulder Joint,Task Performance and Analysis,Work,physiology,prevention & control
GEORGE1991	THE ATHLETIC HEART SYNDROME - A CRITICAL-REVIEW	SPORTS MEDICINE	11	5		300--330	1991																Cardiological findings in athletes are often similar to those observed in clinical cases. Electrocardiographic and cardiac imaging abnormalities as well as physical findings may be the same in both of these groups. Bradycardia and rhythm disturbances are the most common abnormalities in athletes. Most athletes with abnormal electrocardiograms are asymptomatic and numerous investigators have faile…
GULCH1991	ECCENTRIC AND POSTECCENTRIC CONTRACTILE BEHAVIOR OF SKELETAL-MUSCLE - A COMPARATIVE-STUDY IN FROG SINGLE FIBERS AND IN HUMANS	EUROPEAN JOURNAL OF APPLIED PHYSIOLOGY AND OCCUPATIONAL PHYSIOLOGY	63	5		323--329	1991																Eccentric and posteccentric force behaviour in human skeletal muscle and in isolated frog muscle fibres was studied by imposing stretch-and-hold loading conditions during contractions with maximal voluntary effort or under tetanic stimulation in the isolated preparations. The investigations on human muscle were made on the forearm flexors of a group of kayak racers (n = 16; age: 17-22 years) and …
Hather1991	Influence of eccentric actions on skeletal muscle adaptations to resistance training.	Acta physiologica Scandinavica	143	2	oct	177--185	1991																Three different training regimens were performed to study the influence of eccentric muscle actions on skeletal muscle adaptive responses to heavy resistance exercise. Middle-aged males performed the leg press and leg extension exercises two days each week. The resistance was selected to induce failure within six to twelve repetitions of each set. Group CON/ECC (n = 8) performed coupled concentri…		Adenosine Triphosphatases,Biopsy,Exercise,Histocytochemistry,Humans,Male,Middle Aged,Muscles,Myofibrils,Periodic Acid-Schiff Reaction,Physical Fitness,Thigh,analysis,anatomy & histology,chemistry,physiology,ultrastructure
Manfredi1991	Plasma creatine kinase activity and exercise-induced muscle damage in older men.	Medicine and science in sports and exercise	23	9	sep	1028--1034	1991																Plasma creatine kinase (CK) activity has often been used as a marker of exercise-induced skeletal muscle damage. While the pattern of muscle damage following eccentric exercise has been established in young adults, there is little data available on eccentric exercise-induced muscle damage in older individuals. The purpose of this study was to compare ultrastructural changes in skeletal muscle fol…		Adult,Age Factors,Creatine Kinase,Exercise,Humans,Male,Middle Aged,Muscles,Myofibrils,Oxygen Consumption,blood,injuries,physiology,ultrastructure
NOSAKA1991	TIME COURSE OF MUSCLE ADAPTATION AFTER HIGH FORCE ECCENTRIC EXERCISE	EUROPEAN JOURNAL OF APPLIED PHYSIOLOGY AND OCCUPATIONAL PHYSIOLOGY	63	1		70--76	1991																The repeated bout effect on changes in muscle damage indicators was examined in two groups of subjects following two bouts of 70 maximal eccentric actions of the forearm flexors. Fourteen college age female subjects were placed into two groups. The two bouts were separated by 6 weeks (n = 6), and 10 weeks (n = 8). The subjects performed the same amount of work for the bouts. The muscle damage ind…
Ryan1991	Velocity-specific and mode-specific effects of eccentric isokinetic training of the hamstrings.	The Journal of orthopaedic and sports physical therapy	13	1		33--39	1991																Ms. Ryan and Ms. Magidow completed this research project in partial fulfillment of the requirement for the degree of Masters of Science in the Department of Physical Therapy in the Graduate School, Duke University, 1989 This study examined velocity-specific and mode-specific effects of eccentric isokinetic training of the hamstrings. Female volunteers aged 21 to 40 were assigned to an exercise gr…
SCHRADER1991	SUCCESSFUL DIRECTIONAL CORONARY ATHERECTOMY AFTER FAILED BALLOON ANGIOPLASTY	DEUTSCHE MEDIZINISCHE WOCHENSCHRIFT	116	6		212--216	1991																Coronary arteriography revealed severe stenoses of the proximal part of the anterior interventricular branch with normal ventricular function in two patients (aged 42 and 38 years) with stable angina and ischaemia reaction in the exercise ECG. In the first patient it was a short spur-like 80% narrowing. But percutaneous baloon angioplasty failed to change the angiographic appearance. In the other…
Schrader1991	R.; Rummel	D.; Sievert	H.; Kober	G.; Kaltenbach	M."	[Successful directional coronary atherectomy after futile attempts at balloon dilatation].	Deutsche medizinische Wochenschrift (1946)	116	6	feb	212--216	1991
Shellock1991	Exertional muscle injury: evaluation of concentric versus eccentric actions with serial MR imaging.	Radiology	179	3	jun	659--664	1991																Eccentric muscular actions involve the forced lengthening or stretching of muscles and tend to produce exertional injuries. This study used magnetic resonance (MR) imaging to serially evaluate muscles in five healthy, untrained subjects who performed exhaustive biceps exercise by doing isolated eccentric and concentric actions with a dumbbell. Symptoms were assessed, and T2-weighted images of the…		Adult,Arm,Cumulative Trauma Disorders,Female,Humans,Magnetic Resonance Imaging,Male,Middle Aged,Muscles,Physical Exertion,anatomy & histology,diagnosis,injuries
SVANTESSON1991	USE OF A KIN-COM DYNAMOMETER TO STUDY THE STRETCH-SHORTENING CYCLE DURING PLANTAR FLEXION	EUROPEAN JOURNAL OF APPLIED PHYSIOLOGY AND OCCUPATIONAL PHYSIOLOGY	62	6		415--419	1991																The aim of this study was to evaluate the Kin-Com II dynamometer in the study of the stretch-shortening cycle (a concentric muscle action preceded by an eccentric muscle action). Measurements were made of plantar flexion at different angular velocities (120-degrees.s-1 and 240-degrees.s-1) with the knee at two different angles (0-degrees and 90-degrees). Ten healthy women ranging in age from 22 t…
VonScheidt1991	Dilated angiopathy: a specific subtype of allograft coronary artery disease.	The Journal of heart and lung transplantation : the official publication of the International Society for Heart Transplantation	10	5 Pt 1		698--703	1991																Dilated coronary angiopathy exceeding the diameter of adjacent vessel segments by at least 50% was found in five of 68 heart transplant recipients undergoing coronary angiography greater than or equal to 1 year after heart transplantation. Severely delayed washout of the contrast medium from the dilated segments indicated local stasis. Dilated angiopathy was not combined with tubular narrowing of…		Adult,Coronary Disease,Dilatation, Pathologic,Female,Heart Transplantation,Hemodynamics,Humans,Male,Middle Aged,Radiography,Transplantation, Homologous,diagnostic imaging,pathology,physiopathology
VONSCHEIDT1991	DILATED ANGIOPATHY - A SPECIFIC SUBTYPE OF ALLOGRAFT CORONARY-ARTERY DISEASE	JOURNAL OF HEART AND LUNG TRANSPLANTATION	10	5		698--703	1991																Dilated coronary angiopathy exceeding the diameter of adjacent vessel segments by at least 50% was found in five of 68 heart transplant recipients undergoing coronary angiography greater-than-or-equal-to 1 year after heart transplantation. Severely delayed washout of the contrast medium from the dilated segments indicated local stasis. Dilated angiopathy was not combined with tubular narrowing of…
ABE1992	ISOMETRIC AND ISOKINETIC KNEE-JOINT PERFORMANCE IN JAPANESE ALPINE SKI RACERS	JOURNAL OF SPORTS MEDICINE AND PHYSICAL FITNESS	32	4		353--357	1992																Isometric and isokinetic (concentric and eccentric, strength of alpine skiers with different performance levels were measured. Nine national (elite, EG) and 10 collegiate (trained, TG) female alpine skiers (16 to 23 years of age) performed maximal voluntary knee extension and flexion. Peak torque was measured at an angular velocity of 30 deg.s-1. The cross-sectional area (CSA) of thigh muscles (q…
DONNELLY1992	EXERCISE-INDUCED MUSCLE DAMAGE - EFFECTS OF LIGHT EXERCISE ON DAMAGED MUSCLE	EUROPEAN JOURNAL OF APPLIED PHYSIOLOGY AND OCCUPATIONAL PHYSIOLOGY	64	4		350--353	1992																The effects of performing light eccentric exercise (LB) during the period of recovery from a heavy eccentric exercise bout (HB) were studied. An experimental and a control group, each consisting of nine college age volunteers (seven women, two men) performed two HB - HB1 and HB2 - 14 days apart, using the elbow flexor and extensor muscles of one arm. The experimental group performed an additional…
Evans1992	Exercise, nutrition and aging.	The Journal of nutrition	122	3 Suppl	mar	796--801	1992																Advancing age is associated with profound changes in body composition, including increased fat mass, decreased fat-free mass (particularly muscle), decreased total body water and decreased bone density. Along with these changes in body compositions, and perhaps as a direct result of them, elderly people have lower energy needs, reduced strength and functional capacity and a greatly increased risk…		Aged,Aged, 80 and over,Aging,Animals,Exercise,Humans,Muscle Proteins,Muscles,Nutritional Physiological Phenomena,Vitamin E,metabolism,pharmacology,physiology
FENETY1992	ISOKINETIC TRUNK STRENGTH AND LUMBOSACRAL RANGE OF MOTION IN ELITE FEMALE FIELD HOCKEY PLAYERS REPORTING LOW-BACK-PAIN	JOURNAL OF ORTHOPAEDIC & SPORTS PHYSICAL THERAPY	16	3		129--135	1992																Physical therapists have reported an increased incidence of low back pain (LBP) in female field hockey (FH) players, commonly accompanied by decreased trunk range of motion (ROM) and strength. The purpose of this study was to compare lumbosacral sagittal ROM and isokinetic trunk strength in three groups of women: 1) FH athletes with a history of chronic LBP, 2) pain-free FH athletes, and 3) an ag…
Golden1992	Strength after bouts of eccentric or concentric actions.	Medicine and science in sports and exercise	24	8	aug	926--933	1992																This study examined the influence of an initial bout of eccentric or concentric actions and a subsequent bout of eccentric actions on muscular strength. Twenty-four healthy males, 24-45 yr old, were placed in three groups that performed eccentric actions in bouts 1 and 2 (ECC/ECC, N = 8), concentric actions in bout 1, and eccentric actions in bout 2 (CON/ECC, N = 8) or served as controls (N = 8).…		Adult,Exercise,Humans,Male,Middle Aged,Movement,Muscles,Thigh,physiology
Grimby1992	Training can improve muscle strength and endurance in 78- to 84-yr-old men.	Journal of applied physiology (Bethesda, Md. : 1985)	73	6	dec	2517--2523	1992																Nine men, 78-84 yr of age, participated in a dynamometer training program 2-3 times/wk, totaling 25 sessions, using voluntary maximal isometric, concentric, and eccentric right knee-extension actions (30 and 180 degrees/s). Measurements of muscle strength with a Kin-Com dynamometer and simultaneous electromyograms (EMG) were performed of both sides before and after the training period. Muscle bio…		Aged,Aged, 80 and over,Citrate (si)-Synthase,Electromyography,Exercise,Fatigue,Humans,Male,Muscles,Physical Education and Training,Physical Endurance,Tomography, X-Ray Computed,anatomy & histology,diagnostic imaging,metabolism,physiology,physiopathology
IanovskiiGV1992	[Diastolic filling of the left ventricle in relation to the degree of its hypertrophy in patients with ischemic heart disease].	Kardiologiia	32	3	mar	17--19	1992																The features of diastolic filling of the left ventricle (LV) were examined in relation to the nature of its hypertrophy in patients with coronary heart disease (CHD). A total of 110 male patients with CHD concurrent with essential hypertension or without it who underwent contrast ventriculography in order to determine LV diastolic stiffness. Radionuclide ventriculography was performed in 49 patie…		Adult,Cardiomegaly,Coronary Disease,Diastole,Hemodynamics,Humans,Male,Middle Aged,Radionuclide Ventriculography,Severity of Illness Index,Sodium Pertechnetate Tc 99m,Ventricular Function, Left,complications,diagnostic imaging,etiology,physiology,physiopathology
LAVIE1992	LEFT-VENTRICULAR HYPERTROPHY - ITS RELATIONSHIP TO OBESITY AND HYPERTENSION	POSTGRADUATE MEDICINE	91	7		131--&	1992																Hypertension and obesity are closely related. Obese patients tend to have increased intravascular volume and cardiac output and decreased total peripheral vascular resistance and plasma renin activity. Lean patients with essential hypertension usually have increased total peripheral resistance. Left ventricular adaptation in obesity consists of eccentric left ventricular hypertrophy (LVH), regard…
Meydani1992	Vitamin E requirement in relation to dietary fish oil and oxidative stress in elderly.	EXS	62			411--418	1992																A growing body of evidence shows that oxygen radicals and other products of free radical reactions are involved in aging and age-related degenerative diseases. Recent studies have suggested that fish oils (FO) have a potentially beneficial effect on age-associated diseases. Consumption of FO may increase requirement for vitamin E, especially under conditions where oxidative stress is increased. V…		Aged,Aging,Animals,Antioxidants,Dietary Fats,Exercise,Female,Fish Oils,Free Radicals,Humans,Lipid Peroxidation,Male,Nutritional Requirements,Physical Conditioning, Animal,Vitamin E,metabolism,physiology
MEYDANI1992	PROTECTIVE ROLE OF DIETARY VITAMIN-E ON OXIDATIVE STRESS IN AGING	AGE	15	3		89--93	1992																Free radical reactions and the peroxidation of membrane lipids have been implicated in the mechanism of aging and age-associated degenerative conditions. Vitamin E appears to play a critical role in protecting the cell membrane from free radical reactions and peroxidation of polyunsaturated fatty acids (PUFA). In a series of human studies, the protective role of vitamin E supplementation against …
Naimark1992	Exercise blood pressure and echocardiographic abnormalities in genetically comparable populations.	The Canadian journal of cardiology	8	5	jun	471--477	1992																OBJECTIVE: To determine the relationship between the systolic blood pressure response to exercise and the echocardiographic dimensions of the left atrium and ventricle in two geographically separate, but genetically comparable, populations. DESIGN AND SETTING: The study was cross-sectional. The settings were two semirural communities, one in Iceland and one in Manitoba. SUBJECTS: Individuals from…		Adult,Blood Pressure,Cardiomegaly,Coronary Disease,Cross-Sectional Studies,Echocardiography,Exercise Test,Humans,Iceland,Longitudinal Studies,Male,Manitoba,Middle Aged,Regression Analysis,Risk Factors,epidemiology,ethnology,genetics,physiology,physiopathology
NOSAKA1992	TIME COURSE OF SERUM-PROTEIN CHANGES AFTER STRENUOUS EXERCISE OF THE FOREARM FLEXORS	JOURNAL OF LABORATORY AND CLINICAL MEDICINE	119	2		183--188	1992																The time course of changes in serum proteins and other blood constituents after eccentric exercise of the forearm flexors by six nonweight-trained female subjects (age, 19.7 +/- 1.9 years) was investigated. Eccentric muscle actions are those in which the muscle lengthens as it exerts force, as when a person lowers a weight. Serum levels of creatine kinase, lactate dehydrogenase, aspartate aminotr…
SACCO1992	CONTRACTILE PROPERTIES AND SUSCEPTIBILITY TO EXERCISE-INDUCED DAMAGE OF NORMAL AND MDX MOUSE TIBIALIS ANTERIOR MUSCLE	CLINICAL SCIENCE	82	2		227--236	1992																1. The functional properties of tibialis anterior muscles of normal adult (C57BL/10) and age-matched dystrophin-deficient (C57BL/10 mdx) mice have been investigated in situ. Comparisons were made between tibialis anterior muscle strength, rates of force development and relaxation, force-frequency responses and fatiguability. Subjecting mdx and C57 muscles to a regimen of eccentric exercise allowe…
Sanz1992	[Clinical and angiographic course after coronary angioplasty. Analysis of predictor factors of restenosis].	Revista espanola de cardiologia	45	9	nov	568--577	1992																In order to know the restenosis rate and its predictive factors and the short-term clinical outcome (6-12 months) after coronary angioplasty (PTCA), we prospectively followed 200 consecutive patients with 231 coronary stenoses successfully dilated (residual stenosis < 50%). Patients have been clinically and angiographically followed 6-9 months after the procedure. Forty-nine clinical, hemodynamic…		Angioplasty, Balloon, Coronary,Constriction, Pathologic,Coronary Angiography,Coronary Disease,Exercise Test,Female,Follow-Up Studies,Humans,Male,Middle Aged,Multivariate Analysis,Odds Ratio,Predictive Value of Tests,Recurrence,Sensitivity and Specificity,diagnosis,therapy
STARON1992	ASSESSMENT OF SKELETAL-MUSCLE DAMAGE IN SUCCESSIVE BIOPSIES FROM STRENGTH-TRAINED AND UNTRAINED MEN AND WOMEN	EUROPEAN JOURNAL OF APPLIED PHYSIOLOGY AND OCCUPATIONAL PHYSIOLOGY	65	3		258--264	1992																The effects of repeated biopsy sampling on muscle morphology was qualitatively and quantitatively assessed in strength-trained and untrained men and women. College-age men (13) and women (8) resistance trained twice a week for 8 weeks. A progressive resistance-training program was performed consisting of squats, leg presses, and leg extensions. Nontraining men (7) and women (5) served as controls…
Thadani1992	Effects of 8:00 a.m. and 2:00 p.m. doses of isosorbide-5-mononitrate during twice-daily therapy in stable angina pectoris.	The American journal of cardiology	70	3	aug	286--292	1992																Trough" plasma concentrations of isosorbide-5-mononitrate (IS-5-MN)	an active metabolite of isosorbide dinitrate	of less than 95 ng/ml are considered necessary to prevent development of tolerance to isosorbide dinitrate and IS-5-MN. In a double-blind	crossover	placebo-controlled study
Wetzig1992	Clinical verification of a unilateral otolith test.	Acta astronautica	27		jul	19--24	1992																In a previous study we reported promising results for a new test to differentiate in vivo unilateral otolith functions. That study pointed to a need for further validation on known pathological cases. In this presentation we will detail the results gathered on a group of clinically verified vestibular defectives (verum) and a normal (control) group. The subjects in the verum group were former pat…		Adult,Aged,Disease Susceptibility,Ear, Inner,Female,Humans,Male,Middle Aged,Otolithic Membrane,Proprioception,Rotation,Space Motion Sickness,Task Performance and Analysis,Vestibular Function Tests,adverse effects,etiology,physiology,physiopathology,surgery
Ajayi1993	Spectrum of hypertensive heart disease in Nigerians: cross-sectional study of echocardiographic indices and their correlation with treadmill exercise capacity.	Journal of hypertension	11	1	jan	99--102	1993																OBJECTIVES: The aims of this study were to provide cross-sectional data on echocardiography in Nigerians with normotension, essential hypertension and hypertensive heart failure, and to correlate the echocardiographic indices with treadmill functional capacity. METHODS: M-mode and two-dimensional echocardiography and a Bruce protocol treadmill test were undertaken in Nigerians with essential hype…		Cardiac Output, Low,Cardiomegaly,Confidence Intervals,Cross-Sectional Studies,Echocardiography,Exercise Test,Female,Humans,Hypertension,Male,Middle Aged,Nigeria,Ventricular Function, Left,complications,diagnostic imaging,epidemiology,etiology,physiology,physiopathology
Aratow1993	Intramuscular pressure and electromyography as indexes of force during isokinetic exercise.	Journal of applied physiology (Bethesda, Md. : 1985)	74	6	jun	2634--2640	1993																A direct method for measuring force production of specific muscles during dynamic exercise is presently unavailable. Previous studies indicate that both intramuscular pressure (IMP) and electromyography (EMG) correlate linearly with muscle contraction force during isometric exercise. The objective of this study was to compare IMP and EMG as linear assessors of muscle contraction force during dyna…		Adult,Biomechanical Phenomena,Electrodes,Electromyography,Exercise,Humans,Isometric Contraction,Male,Middle Aged,Muscle Contraction,Muscles,Pressure,anatomy & histology,instrumentation,physiology
Cowley1993	Experience with directional coronary atherectomy since pre-market approval.	The American journal of cardiology	72	13	oct	12E--20E	1993																Directional coronary atherectomy (DCA) received Food and Drug Administration (FDA) Pre-Market Approval in September 1990 and was then released through formal training certification of physicians at each new site. Procedure volume has increased dramatically since approval, with > 17,000 DCA procedures performed in 1991 and a cumulative total of > 33,000 procedures by mid-1992, at > 670 centers in …	clinical success in 94%	with major complications in 4.6% (including urgent bypass surgery in 3.8%	Q wave myocardial infarction in 1.7%	and hospital mortality in 0.3%). Results before and after FDA approval were similar for procedural success (94% vs 96%)
Fielding1993	Acute phase response in exercise. III. Neutrophil and IL-1 beta accumulation in skeletal muscle.	The American journal of physiology	265	1 Pt 2	jul	R166--72	1993																Nine untrained men (22-29 yr) performed 45 min of downhill running (16% incline, 70% of maximum heart rate). Needle biopsies of the vastus lateralis were performed before, 45 min after, and 5 days after exercise. Immunohistochemical staining of muscle cross sections revealed a 135% increase in muscle interleukin-1 beta (IL-1 beta) immediately after and a 250% increase (P < 0.03) 5 days after exer…		Acute-Phase Reaction,Adult,Creatine Kinase,Humans,Interleukin-1,Male,Microscopy, Electron,Muscles,Neutrophils,Physical Exertion,cytology,metabolism,ultrastructure
GRIFFIN1993	ECCENTRIC MUSCLE PERFORMANCE OF ELBOW AND KNEE MUSCLE GROUPS IN UNTRAINED MEN AND WOMEN	MEDICINE AND SCIENCE IN SPORTS AND EXERCISE	25	8		936--944	1993																Maximal voluntary eccentric (ECC) and concentric (CON) capacity of knee and elbow muscle groups was investigated in healthy untrained men (N = 40) and women (N = 50), 21-67 yr of age. Purposes of the study were to describe torque-velocity and ECC-CON relationships. and to compare these relationships among muscle groups and between genders. Average torque was measured at angular velocities of 30-d…
Kawakami1993	Concentric and eccentric muscle strength before, during and after fatigue in 13 year-old boys.	European journal of applied physiology and occupational physiology	67	2		121--124	1993																The purpose of this study was to investigate the force-producing characteristics of boys aged 13 years in relation to fatigue of elbow flexor muscles. Maximal voluntary force in elbow flexion was measured before and after a muscle endurance test (MET) by using an isokinetic dynamometer isometrically, concentrically and eccentrically at three velocities, i.e. 0.21, 0.52, and 1.05 rad.s-1. The MET …		Adolescent,Elbow,Exercise,Fatigue,Humans,Male,Muscles,Physical Endurance,Ultrasonography,anatomy & histology,diagnostic imaging,physiology,physiopathology
KRUMHOLZ1993	SEX-DIFFERENCES IN CARDIAC ADAPTATION TO ISOLATED SYSTOLIC HYPERTENSION	AMERICAN JOURNAL OF CARDIOLOGY	72	3		310--313	1993																This study examines the association of isolated systolic hypertension with left ventricular (LV) mass and geometry in men and women. The subjects of this study were surviving members of the Framingham Heart Study and the Framingham Offspring Study who attended the index examination (between 1979 and 1983) and were aged greater-than-or-equal-to 50 years, free of clinically apparent cardiovascular …
LeBlanc1993	Evaluation of muscle injury using magnetic resonance imaging.	Clinical journal of sport medicine : official journal of the Canadian Academy of Sport Medicine	3	1	jan	26--30	1993																The objective of this study was to investigate spin echo T2 relaxation time changes in thigh muscles after intense eccentric exercise in healthy men. Spin echo and calculated T2 relaxation time images of the thighs were obtained on several occasions after exercise of one limb; the contralateral limb served as control. Muscle damage was verified by elevated levels of serum creatine kinase (CK). Th…		Adult,Creatine Kinase,Humans,Magnetic Resonance Imaging,Male,Middle Aged,Muscle, Skeletal,Physical Exertion,Soft Tissue Injuries,Thigh,Time Factors,diagnosis,injuries,metabolism,physiology,physiopathology
Lemaire1993	Gait patterns of elderly men with trans-tibial amputations.	Prosthetics and orthotics international	17	1	apr	27--37	1993																Gait patterns for the non-amputated leg of eight elderly men with trans-tibial amputations were assessed using kinematic and kinetic measures. Kinematically, the subject's walking speed was faster than expected but less than normative non-amputee data. The stride length was also less than non-amputee norms. Net joint moment and power analyses showed various discrepancies between the amputee subje…		Age Factors,Aged,Amputation Stumps,Ankle,Artificial Limbs,Biomechanical Phenomena,Body Height,Gait,Hip,Humans,Knee,Male,Tibia,Time Factors,Walking,classification,physiopathology,surgery
Meydani1993	Protective effect of vitamin E on exercise-induced oxidative damage in young and older adults.	The American journal of physiology	264	5 Pt 2	may	R992--8	1993																The protective effect of vitamin E supplementation on exercise-induced oxidative damage was tested in 21 male volunteers. Nine young (22-29 yr) and 12 older (55-74 yr) sedentary male subjects participated in a double-blind protocol and received either 800 IU dl-alpha-tocopherol or a placebo daily. After 48 days, vitamin E supplementation significantly increased alpha-tocopherol in plasma and skel…		Adult,Aged,Aging,Ascorbic Acid,Exercise,Fatty Acids,Humans,Male,Malondialdehyde,Middle Aged,Muscles,Oxidation-Reduction,Uric Acid,Vitamin E,blood,metabolism,pharmacology,physiology,urine
MILES1993	CREATINE-KINASE ISOENZYME MB MAY BE ELEVATED IN HEALTHY-YOUNG WOMEN AFTER SUBMAXIMAL ECCENTRIC EXERCISE	JOURNAL OF LABORATORY AND CLINICAL MEDICINE	122	2		197--201	1993																Elevations in serum creatine kinase isoenzyme MB (CK MB) after exercise may be of clinical importance for the diagnosis of myocardial infarction. However, CK MB has been observed to increase after exercise in highly trained endurance runners. No data exist relating to the effect of exercise in a heterogeneous female population with regard to CK MB. The purpose of the present investigation was to …
MISSAULT1993	CARDIAC ANATOMY AND DIASTOLIC FILLING IN PROFESSIONAL ROAD CYCLISTS	EUROPEAN JOURNAL OF APPLIED PHYSIOLOGY AND OCCUPATIONAL PHYSIOLOGY	66	5		405--408	1993																In the literature two divergent types of exercise-induced cardiac hypertrophy have been described: isotonic exercise induced eccentric hypertrophy with proportional increase in end-diastolic left ventricular dimension and wall thickness and isometric exercise induced concentric hypertrophy with normal end-diastolic left ventricular dimension but increased wall thickness. Using echocardiography, c…
Parker1993	Eccentric dosing with isosorbide-5-mononitrate in angina pectoris.	The American journal of cardiology	72	12	oct	871--876	1993																In a placebo-controlled, parallel, double-blind study, 214 patients with stable angina were studied. Doses of 5, 10 and 20 mg of immediate-release isosorbide-5-mononitrate (IS-5-MN) or placebo were administered at 0800 and 1500 hours for a period of 3 weeks. On days 1 and 14, patients underwent exercise testing before, and 2 and 7 hours after both doses; on days 7 and 21, testing was performed 2 …		Adult,Aged,Aged, 80 and over,Angina Pectoris,Double-Blind Method,Drug Administration Schedule,Drug Tolerance,Electrocardiography,Exercise Test,Female,Humans,Isosorbide Dinitrate,Male,Middle Aged,Myocardial Ischemia,Placebos,Tablets,Time Factors,Vasodilator Agents,administration & dosage,analogs & derivatives,drug therapy,physiopathology,therapeutic use
SINACORE1993	THE ROLE OF SKELETAL-MUSCLE IN GLUCOSE-TRANSPORT, GLUCOSE-HOMEOSTASIS, AND INSULIN-RESISTANCE - IMPLICATIONS FOR PHYSICAL THERAPY	PHYSICAL THERAPY	73	12		878--891	1993																Skeletal muscle has a fundamentally important role in the maintenance of normal glucose homeostasis and in regulating whole-body carbohydrate metabolism. In this review, we discuss the regulation of skeletal muscle glucose transport by muscular activity and inactivity. A large number of patients routinely seen by physical therapists exhibit some form of skeletal muscle insulin resistance. Therefo…
Teasdale1993	On the cognitive penetrability of posture control.	Experimental aging research	19	1		1--13	1993																Postural sway increases with age. The decreased stability associated with postural sway often has been related to the reduced peripheral sensibility in the visual, vestibular, and proprioceptive systems. We examined whether the micropostural adjustments necessary for maintaining balance also require some cognitive processing. Young and older subjects were submitted to an auditory reaction time ta…		Acoustic Stimulation,Adult,Aged,Aging,Analysis of Variance,Attention,Cognition,Female,Foot,Humans,Male,Posture,Pressure,Reaction Time,Sensation,physiology
Tiliket1993	Adaptation of the vestibulo-ocular reflex with the head in different orientations and positions relative to the axis of body rotation.	Journal of vestibular research : equilibrium & orientation	3	2		181--195	1993																We investigated the influence of static head orientation and position, relative to the axis of body rotation, upon vestibular adaptation. With the head centered, displaced anterior to the axis of body rotation, or tilted 40 degrees to 45 degrees in roll or pitch, the gain of the vestibulo-ocular reflex (VOR) was trained (to go either up or down) for one hour using artificial manipulation of the v…		Adaptation, Physiological,Adult,Eye Movements,Female,Head,Humans,Male,Middle Aged,Movement,Orientation,Posture,Reflex, Vestibulo-Ocular,physiology
VILLAGRA1993	METABOLIC COST AND EFFICIENCY IN 2 FORMS OF SQUATTING EXERCISE IN CHILDREN AND ADULTS	EUROPEAN JOURNAL OF APPLIED PHYSIOLOGY AND OCCUPATIONAL PHYSIOLOGY	67	6		549--553	1993																These experiments investigated the oxygen consumption and work efficiency of adults and children performing identical movement patterns. Adult men (mean age 24) and male children (mean age 12) performed squatting exercises with and without a pause at the lowest point of the squat. The former were termed no rebound squats and the latter were termed rebound squats. Subjects performed the exercises …
Werner1993	Isokinetic quadriceps training in patients with patellofemoral pain syndrome.	Knee surgery, sports traumatology, arthroscopy : official journal of the ESSKA	1	3-4		162--168	1993																The aims of the present investigation were (a) to evaluate the effect of eccentric quadriceps training in patients with unilateral patellofemoral pain and (b) to compare the effect of eccentric and concentric quadriceps training in patients with bilateral patellofemoral pain. Fifteen patients (9 male and 6 female, aged 17-36 years with a mean of 27.5 years) participated in this study. Nine patien…		Adolescent,Adult,Exercise Therapy,Female,Femur,Humans,Knee Joint,Male,Muscle, Skeletal,Pain,Pain Measurement,Patella,Thigh,Treatment Outcome,physiopathology,rehabilitation
Werner1993a	Effect of taping the patella on concentric and eccentric torque and EMG of knee extensor and flexor muscles in patients with patellofemoral pain syndrome.	Knee surgery, sports traumatology, arthroscopy : official journal of the ESSKA	1	3-4		169--177	1993																The acute effect of patella taping on torque and electromyographic (EMG) activity in maximal voluntary concentric and eccentric action of the knee extensor and flexor muscles in patients with patellofemoral pain syndrome was studied in 48 patients (62 knees). The patients (28 female, 20 male) were tested concentrically and eccentrically on a Kin-Com dynamometer with simultaneous EMG recording wit…		Adolescent,Adult,Electromyography,Female,Humans,Isometric Contraction,Knee Joint,Male,Middle Aged,Muscle, Skeletal,Pain,Patella,Range of Motion, Articular,Tourniquets,innervation,physiology,physiopathology
Cannon1994	Aging and stress-induced changes in complement activation and neutrophil mobilization.	Journal of applied physiology (Bethesda, Md. : 1985)	76	6	jun	2616--2620	1994																We measured the extent of complement activation and neutrophil mobilization after eccentric exercise to determine whether these responses were age dependent and whether they were associated with changes in plasma creatine kinase (CK), a marker for muscle membrane integrity. Repeated forced lengthening of a muscle as it develops tension causes immediate ultrastructural damage to sarcomeres, follow…		Adult,Aged,Aging,Complement Activation,Complement C3a,Creatine Kinase,Creatinine,Exercise,Female,Humans,Leukocyte Count,Male,Middle Aged,Neutrophils,Stress, Physiological,analogs & derivatives,blood,metabolism,physiology,physiopathology,urine
CARMELI1994	THE PHYSIOLOGY AND BIOCHEMISTRY OF SKELETAL-MUSCLE ATROPHY AS A FUNCTION OF AGE	PROCEEDINGS OF THE SOCIETY FOR EXPERIMENTAL BIOLOGY AND MEDICINE	206	2		103--113	1994																The skeletal muscles are an important entity in the proper function of aging animals and humans. Studies have shown that until humans are 60-70 years old, age-related changes in muscle function and structure are relatively small, while after 70 years, these alterations are accelerated considerably. Factors responsible for the ''aging'' of skeletal muscles are complex and include intrinsic biochem…
Engardt1994	Rising and sitting down in stroke patients. Auditory feedback and dynamic strength training to enhance symmetrical body weight distribution.	Scandinavian journal of rehabilitation medicine. Supplement	31			1--57	1994																The purpose was to study vertical ground reaction force feedback and dynamic knee extensor training used to enhance stroke patients' symmetrical body weight distribution while rising and sitting down. Sixteen healthy subjects and 51 stroke patients participated in the studies. Two vertical strain gauge force transducers attached to two force-measuring platforms were used to measure body weight di…		Adult,Aged,Cerebrovascular Disorders,Electromyography,Exercise Therapy,Feedback,Female,Humans,Knee Joint,Male,Middle Aged,Movement,Muscle, Skeletal,Physical Therapy Modalities,Posture,Tissue Distribution,methods,physiology,physiopathology,rehabilitation
Fujita1994	Variable responses of highly stenotic coronary arteries and collateral circulation to intracoronary injection of nitroglycerin in patients with chronic effort angina.	Coronary artery disease	5	6	jun	525--529	1994																AIM: To assess the direct effects of nitroglycerin on coronary and collateral circulation, 31 consecutive patients with low exercise capacity resulting from chronic effort angina but who had not suffered previous myocardial infarction were investigated. METHODS: Rapid atrial pacing was used to induce myocardial ischemia, with the same pacing rate before and after an intracoronary injection of 50 …		Adult,Aged,Angina Pectoris,Blood Pressure,Cardiac Pacing, Artificial,Chronic Disease,Collateral Circulation,Coronary Circulation,Coronary Disease,Coronary Vessels,Electrocardiography,Female,Heart Rate,Humans,Injections,Male,Middle Aged,Myocardial Ischemia,Nitroglycerin,Physical Exertion,Ventricular Function, Left,Ventricular Pressure,administration & dosage,drug effects,drug therapy,physiopatholo…
HOPE1994	COMMUNITY PHOTOSCREENING OF 6-MONTH-OLD TO 9-MONTH-OLD INFANTS FOR AMBLYOPIOGENIC RISK-FACTORS	AUSTRALIAN AND NEW ZEALAND JOURNAL OF OPHTHALMOLOGY	22	3		193--202	1994																Photorefraction (PR) is gaining acceptance as potentially the most effective objective screening technique for amblyopia risk factors in the preverbal child. This study determined the validity and feasibility of using the Auckland eccentric photorefractor in the detection of amblyopiogenic factors in six to nine month old infants in an established community-based vision screening program. Photogr…
Horstmann1994	K.; Dickhuth	H. H."	The cardiocirculatory reaction to isokinetic exercises in dependence on the form of exercise and age.	International journal of sports medicine	15 Suppl 1		jan	S50--5	1994																Although isokinetic training is gaining in importance in prevention and rehabilitation, even for older patients, there is hardly any information available on the extent of cardiocirculatory stress. This study was aimed, therefore, at examining the cardiocirculatory reaction to various isokinetic forms of exercise in dependence on age. Sixty-four subjects between 22 and 60 years of age were assign…		Adult,Age Factors,Blood Pressure,Catecholamines,Exercise,Heart,Heart Rate,Humans,Male,Middle Aged,blood,physiology
Jubrias1994	Increased incidence of a resonance in the phosphodiester region of 31P nuclear magnetic resonance spectra in the skeletal muscle of fibromyalgia patients.	Arthritis and rheumatism	37	6	jun	801--807	1994																OBJECTIVE: To determine if patients with fibromyalgia syndrome (FMS) are more susceptible to activity-induced muscle damage than are healthy subjects. METHODS: Eleven FMS patients and 10 healthy subjects performed concentric and eccentric exercise with their dominant and nondominant forearms, respectively. 31P magnetic resonance spectroscopy (to assess inorganic phosphate [P(i)] and phosphocreati…		Adult,Exercise,Fibromyalgia,Humans,Magnetic Resonance Spectroscopy,Male,Middle Aged,Muscles,Pain Measurement,Phosphates,Phosphocreatine,Phosphorus Isotopes,analysis,chemistry,physiopathology
Kerkhoff1994	U.; Meier	E. K."	Neurovisual rehabilitation in cerebral blindness.	Archives of neurology	51	5	may	474--481	1994																OBJECTIVE: The efficacy of a systematic training of saccadic eye movements was evaluated in hemianopic patients with three main objectives: (1) to determine the role of visual field recovery, (2) to assess the transfer of treatment gains to functional outcome measures, and (3) to evaluate the patients' subjective experience throughout therapy. DESIGN: Within-subject repeated measures design. The …		Activities of Daily Living,Adolescent,Adult,Brain Diseases,Female,Hemianopsia,Humans,Male,Middle Aged,Visual Fields,complications,etiology,rehabilitation,therapy
Kilmer1994	The effect of a high resistance exercise program in slowly progressive neuromuscular disease.	Archives of physical medicine and rehabilitation	75	5	may	560--563	1994																A 12-week high resistance home exercise program was completed by 10 subjects with slowly progressive neuromuscular diseases (NMD) and 6 normal control subjects (CTL). After evaluating baseline maximal isometric and isokinetic strength of the elbow flexors and knee extensors, subjects completed the home program using adjustable ankle and wrist cuff weights. One side of the body was randomly chosen…		Adult,Aged,Elbow Joint,Exercise Therapy,Female,Humans,Isometric Contraction,Knee Joint,Male,Middle Aged,Muscle Contraction,Neuromuscular Diseases,physiology,physiopathology,rehabilitation
LANDS1994	A SIMPLE ISOKINETIC CYCLE FOR MEASUREMENT OF LEG MUSCLE FUNCTION	JOURNAL OF APPLIED PHYSIOLOGY	77	5		2506--2510	1994																The measurement of net pedaling torque during isokinetic cycling allows for the evaluation of leg muscle strength and work capacity over fixed time intervals. However, the expense and difficulty of constructing an isokinetic cycle have limited the widespread application of this useful research tool. We have modified a simple commercially available isokinetic cycle that uses hydraulics to maintain…
Lynn1994	Decline running produces more sarcomeres in rat vastus intermedius muscle fibers than does incline running.	Journal of applied physiology (Bethesda, Md. : 1985)	77	3	sep	1439--1444	1994																Unaccustomed eccentric exercise, in which a muscle is lengthened while generating tension, is well known to cause injury and pain. A rapid training effect has been demonstrated in a number of eccentric exercises. The mechanism for both the damage and the training has been unknown. Morgan proposed that the damage is caused by sarcomere length instabilities during operation on the descending limb o…		Adaptation, Physiological,Aging,Animals,Female,Male,Muscle Fibers, Skeletal,Muscle, Skeletal,Physical Conditioning, Animal,Rats,Sarcomeres,physiology,ultrastructure
MAGNUSSON1994	SHOULDER WEAKNESS IN PROFESSIONAL BASEBALL PITCHERS	MEDICINE AND SCIENCE IN SPORTS AND EXERCISE	26	1		5--9	1994																The purposes of this study were to: 1) compare shoulder range of motion and strength in professional baseball pitchers (N = 47) compared with age-matched controls (N = 16), and 2) examine the relationship of injury history to strength and range of motion. Based on injury history pitchers were categorized as: 1) none (N = 26), 2) injury requiring conservative intervention (N = 9), or 3) injury req…
Mayer1994	K.; Dickhuth	H. H."	Reproducibility of isokinetic peak torque and angle at peak torque in the shoulder joint.	International journal of sports medicine	15 Suppl 1		jan	S26--31	1994																Adequate reliability studies of knee flexion and extension are currently available for isokinetic measurements, but not for the shoulder joint. For this reason, this study examines the variability (%) in the determination of peak torque (PT) and the angle at peak torque (AP) in the test-retest procedure. Differentiation is made between the various types of work (concentric, isometric, eccentric) …		Adult,Female,Humans,Male,Middle Aged,Muscles,Range of Motion, Articular,Reproducibility of Results,Shoulder Joint,physiology
Mikesky1994	Efficacy of a home-based training program for older adults using elastic tubing.	European journal of applied physiology and occupational physiology	69	4		316--320	1994																The purpose of this study was to investigate the efficacy of, and the adherence to, a 12-week home-based progressive resistance training program for older adults utilizing elastic tubing. Sixty-two adults (mean age, 71.2 years) qualified to participate in the study. Subjects were randomly assigned to either the exercise (E) (n = 31) or non-exercise (NE) group (n = 31). Pre- and post-testing inclu…		Aged,Exercise,Female,Hemodynamics,Humans,Leg,Male,Muscle Contraction,Muscle, Skeletal,Physical Education and Training,physiology
Montgomery1994	Electromyographic analysis of hip and knee musculature during running.	The American journal of sports medicine	22	2		272--278	1994																The purpose of this study was to describe the firing pattern of 11 hip and knee muscles during running. Thirty recreational runners volunteered to run at 3 different paces with indwelling electromyographic electrodes while being filmed at 100 frames per second. Results demonstrated that medial and lateral vasti muscles acted together for knee extension during terminal swing and loading response, …		Adult,Electromyography,Female,Hip,Humans,Knee,Male,Middle Aged,Muscles,Running,physiology
Schneeweiss1994	[Isosorbide-5-mononitrate in angina pectoris: its efficacy and absence of tolerance and rebound with an eccentric type of administration].	Cardiology	84 Suppl 1			4--12	1994																214 patients with angina pectoris were randomized to placebo or isosorbide-5-mononitrate (ISMN) rapid release 5, 10 or 20 mg b.i.d. at 8 a.m. and 3 p.m. Exercise tests were performed between 8 a.m. and 10 p.m., before and 2 and 7 h after each dose on days 2 and 14 and before and 2 h after the morning dose on days 7 and 21. All doses of ISMN increased exercise duration significantly more than plac…		Adult,Aged,Aged, 80 and over,Analysis of Variance,Angina Pectoris,Canada,Drug Tolerance,Exercise Test,Female,Humans,Isosorbide Dinitrate,Israel,Male,Middle Aged,Survival Analysis,Time Factors,United Kingdom,United States,Vasodilator Agents,administration & dosage,analogs & derivatives,diagnosis,drug effects,drug therapy,epidemiology,statistics & numerical data
Seger1994	Muscle strength and myoelectric activity in prepubertal and adult males and females.	European journal of applied physiology and occupational physiology	69	1		81--87	1994																The purpose of this investigation was to compare children and adults of both genders with respect to torque-velocity, electromyogram (EMG)-velocity and torque-EMG relationships during maximal voluntary knee extensor muscle actions. Four groups of ten subjects each were studied comprising 11-year-old girls and boys and female and male physical education students (22-35 years). Maximal voluntary ec…		Adult,Child,Electromyography,Female,Humans,Male,Muscle Contraction,Muscle, Skeletal,Puberty,Sex Characteristics,physiology
THOMAS1994	PROLONGED RECOVERY FROM ECCENTRIC VERSUS CONCENTRIC EXERCISE	CANADIAN JOURNAL OF APPLIED PHYSIOLOGY-REVUE CANADIENNE DE PHYSIOLOGIE APPLIQUEE	19	4		441--450	1994																In order to determine whether exercise mode affects recovery energy expenditure, 7 active men (average age 25 yrs) performed a control rest and three submaximal exercise bouts in counterbalanced order in separate weeks. The bouts, designed to involve three levels of eccentric muscular activity, included 60% VO(2)mar jog (60 J), 60% downhill (-5%) jog (60 DH), 60% cycling (60 C), and a control ses…
Tiliket1994	Short-term vestibulo-ocular reflex adaptation in humans. I. Effect on the ocular motor velocity-to-position neural integrator.	Experimental brain research	100	2		316--327	1994																We investigated the effect of short-term vestibulo-ocular reflex (VOR) adaptation in normal human subjects on the dynamic properties of the velocity-to-position ocular motor integrator that holds positions of gaze. Subjects sat in a sinusoidally rotating chair surrounded by an optokinetic nystagmus drum. The movement of the visual surround (drum) was manipulated relative to the chair to produce a…		Adaptation, Physiological,Adult,Eye Movements,Female,Humans,Male,Middle Aged,Motion Perception,Orientation,Reflex, Vestibulo-Ocular,physiology
TOPP1994	RELIABILITY OF ISOMETRIC AND ISOKINETIC EVALUATIONS OF ANKLE DORSI PLANTAR STRENGTH AMONG OLDER ADULTS	ISOKINETICS AND EXERCISE SCIENCE	4	4		157--163	1994																The purpose of this study was to evaluate the reliability of two procedures that assess ankle dorsi/plantar flexion strength among adults greater-than-or-equal-to 65 years of age. Twenty-two older (mean 72.8 years) volunteers completed two testing sessions in which isometric and isokinetic protocols measuring ankle dorsi/plantar flexion strength were performed. The interval between the two testin…
WATCHKO1994	AGE-RELATED DIFFERENCES IN DIAPHRAGM MUSCLE INJURY AFTER LENGTHENING ACTIVATIONS	JOURNAL OF APPLIED PHYSIOLOGY	77	5		2125--2133	1994																The susceptibility of postnatal day 15 and adult rat diaphragms (DIAs) to acute injury after repetitive isovelocity lengthening activations was examined in vitro. Forces were measured during two phases of each stimulation protocol: 1) isometric phase: during the first 300 ms of each 500-ms train, DIA length was not changed; and 2) isovelocity lengthening phase: during the remaining 200 ms of each…
CANNON1995	AGING AND DIETARY MODULATION OF ELASTASE AND INTERLEUKIN-1-BETA SECRETION	AMERICAN JOURNAL OF PHYSIOLOGY-REGULATORY INTEGRATIVE AND COMPARATIVE PHYSIOLOGY	268	1		R208--R213	1995																Aging is associated with diminished immune function that may stem from alterations in arachidonic acid metabolism and lipid peroxidation. This study sought to determine if dietary modification of fatty acids influenced neutrophil and monocyte secretion after an in vivo inflammatory stress in older human subjects. Volunteers participated in protocols that forced their quadriceps muscles to lengthe…
CASTANEDA1995	PROTEIN-TURNOVER AND ENERGY-METABOLISM OF ELDERLY WOMEN FED A LOW-PROTEIN DIET	AMERICAN JOURNAL OF CLINICAL NUTRITION	62	1		40--48	1995																The metabolic mechanisms of accommodation to a low-protein diet in elderly women were studied. Diets containing 1.47 (low) or 2.94 (adequate) g protein . kg body cell mass(-1). d(-1) (0.45 or 0.92 g . kg body weight(-1) . d(-1), respectively) were fed for 10 wk. Fed state leucine kinetics, fasted and fed metabolic rate, and acute-phase responses to a bout of exercise were measured. Leucine uptake…
Engardt1995	Dynamic muscle strength training in stroke patients: effects on knee extension torque, electromyographic activity, and motor function.	Archives of physical medicine and rehabilitation	76	5	may	419--425	1995																The effects of training with isokinetic maximal voluntary knee extensions were studied in stroke patients. Two groups of 10 patients each trained twice a week for 6 weeks. One group trained exclusively eccentric movements and the other exclusively concentric movements. The effects were evaluated from the following tests before and after the training period. The maximal voluntary strength in conce…		Aged,Cerebrovascular Disorders,Electromyography,Exercise Therapy,Female,Gait,Hemiplegia,Humans,Knee Joint,Male,Middle Aged,Muscle, Skeletal,physiopathology,rehabilitation
FAULKNER1995	MUSCLE ATROPHY AND WEAKNESS WITH AGING - CONTRACTION-INDUCED INJURY AS AN UNDERLYING MECHANISM	JOURNALS OF GERONTOLOGY SERIES A-BIOLOGICAL SCIENCES AND MEDICAL SCIENCES	50			124--129	1995																In old compared with young animals, muscle mass is decreased by 30% to 40%, and maximum force and power are decreased to an even greater extent. The age-related declines in muscle mass and muscle function are similar to those bat occur with decreased physical activity. Despite be similarities, we conclude that the losses in muscle mass, force, and power are not due solely to old animals being les…
Frennesson1995	A computer and video display based system for training eccentric viewing in macular degeneration with an absolute central scotoma.	Documenta ophthalmologica. Advances in ophthalmology	91	1		9--16	1995																A new approach designed to establish the most suitable area for eccentric viewing and to teach and train patients with severe age-related macular degeneration (AMD) to use the eccentric viewing technique is described. Using a computer and video display based system, as well as software written specifically for this purpose, we investigated and trained ten consecutive patients with AMD. The patien…		Aged,Aged, 80 and over,Computer Terminals,Humans,Macular Degeneration,Patient Education as Topic,Reading,Scotoma,Vision, Low,Visual Acuity,complications,etiology,methods,rehabilitation
Gleeson1995	Cardiorespiratory, hormonal and haematological responses to submaximal cycling performed 2 days after eccentric or concentric exercise bouts.	Journal of sports sciences	13	6	dec	471--479	1995																Eccentric muscle actions are known to induce delayed-onset muscle soreness (DOMS) and muscle weakness (reduced static strength and dynamic peak power output) that may persist for several days. The aim of the present study was to determine whether DOMS-inducing exercise affects physiological responses to subsequent submaximal dynamic exercise. Physiological and metabolic responses to a standardize…		Adult,Bicycling,Blood Chemical Analysis,Catecholamines,Creatine Kinase,Heart,Heart Rate,Hormones,Humans,Hydrocortisone,Lactates,Leukocyte Count,Lung,Male,Muscle Contraction,Muscle Weakness,Muscle, Skeletal,Pain,Physical Exertion,Pulmonary Gas Exchange,Respiration,Stress, Physiological,blood,physiology,physiopathology
Hurley1995	Age, gender, and muscular strength.	The journals of gerontology. Series A, Biological sciences and medical sciences	50 Spec No		nov	41--44	1995																Muscular strength can be measured by cable tensiometry, non-motorized dynamometry (e.g., handgrip dynamometer), motorized dynamometry, or with free weights or exercise machines. Advantages and disadvantages of each are discussed. Cross-sectional studies indicate that isometric and concentric strength levels peak between the second and third decade, remain unchanged until the fourth or fifth decad…		Adult,Aged,Aged, 80 and over,Aging,Baltimore,Body Composition,Cross-Sectional Studies,Exercise Test,Female,Humans,Isometric Contraction,Longitudinal Studies,Male,Middle Aged,Motor Activity,Muscle Contraction,Muscle, Skeletal,Sex,physiology
Isabella1995	[Rotational atherectomy and PTCA in complex coronary lesions (B2 and C): the immediate and long-term results].	Giornale italiano di cardiologia	25	9	sep	1127--1138	1995																BACKGROUND: Percutaneous transluminal coronary angioplasty (PTCA) in complex coronary lesions (type B2 and C of the modified AHA/ACC classification) presents a lower primary success rate and higher risk of dissection than type A and B1 lesions. An alternative approach to this lesions is coronary rotational ablation (Rotablator, Heart Technology) with complementary PTCA using low inflation pressur…	16 male	age 37-80 years) were treated with coronary rotational ablation and complementary PTCA between January 1993 and December 1994 (4.7% of all interventional coronary procedures performed in this period in our laboratory). Eleven pts had stable effort angina and 13 pts had unstable	class IB	IIB
KOMULAINEN1995	TRAINING-INDUCED PROTECTION AND EFFECT OF TERMINATED TRAINING ON EXERCISE-INDUCED DAMAGE AND WATER-CONTENT IN MOUSE SKELETAL-MUSCLES	INTERNATIONAL JOURNAL OF SPORTS MEDICINE	16	5		293--297	1995																Muscle swelling in connection with training-induced protection against exercise-induced damage and the disappearance of the protective adaptation after termination of training was studied in male NMRI-mice, aged 8 weeks at the beginning of the experiment, Mice were randomly assigned to several different treatment groups (training, training-exercise, exercise, detraining, detraining-exercise, toge…
KOUTEDAKIS1995	MAXIMAL VOLUNTARY QUADRICEPS STRENGTH PATTERNS IN OLYMPIC OVERTRAINED ATHLETES	MEDICINE AND SCIENCE IN SPORTS AND EXERCISE	27	4		566--572	1995																Peak torques were studied in 10 elite male overtrained athletes and 10 controls matched for sex, age, sport, and performance level. Isokinetic concentric (CON) and eccentric (ECC) maximal voluntary contractions (MVC) of quadriceps muscle were assessed at the angular velocities of 60 degrees, 120 degrees, and 180 degrees . s(-1) Sustained isometric MVCs were also measured at knee angles of 10 degr…
Kramer1995	Short-term adaptation of the phase of the vestibulo-ocular reflex (VOR) in normal human subjects.	Experimental brain research	106	2		318--326	1995																We investigated the effects of short-term vestibulo-ocular reflex (VOR) adaptation on the gain and phase of the VOR, and on eccentric gaze-holding in darkness, in five normal human subjects. For 1 h, subjects sat in a chair that rotated sinusoidally at 0.2 Hz while surrounded by a visual stimulus (optokinetic drum). The drum was rotated relative to the chair, to require a VOR with either a phase …		Adaptation, Psychological,Adult,Fixation, Ocular,Humans,Male,Middle Aged,Nerve Net,Nystagmus, Optokinetic,Reference Values,Reflex, Vestibulo-Ocular,Time Factors,physiology
LAPIER1995	ALTERATIONS IN INTRAMUSCULAR CONNECTIVE-TISSUE AFTER LIMB CASTING AFFECT CONTRACTION-INDUCED MUSCLE INJURY	JOURNAL OF APPLIED PHYSIOLOGY	78	3		1065--1069	1995																This study examined the effect of alterations in rat intramuscular connective tissue (CT), secondary to limb immobilization, on the muscle's susceptibility to contraction-induced injury. Hindlimbs were casted for 3 wk with the extensor digitorum longus muscle fixed in a shortened (IM-SP) or lengthened position (IM-LP). An age-matched control group remained uncasted. Extensor digitorum longus musc…
McBride1995	Prolonged recovery and reduced adaptation in aged rat muscle following eccentric exercise.	Mechanisms of ageing and development	83	3	sep	185--200	1995																We tested the hypothesis that exposure to eccentric (lengthening) contractions results in greater damage and more prolonged recovery in aged rat muscle (32 months) than in adult muscle (6 months), and that the adaptation usually associated with a single exposure to eccentric exercise is reduced in the aged muscle. Experiments were performed using a new rat model for aging studies. Fisher 344/Brow…		Adaptation, Physiological,Aging,Animals,Female,Muscle Contraction,Muscle, Skeletal,Physical Conditioning, Animal,Rats,Rats, Inbred BN,Rats, Inbred F344,physiology
Mokhtarian1995	Effects of treadmill exercise and high-fat feeding on muscle degeneration in mdx mice at the time of weaning	Clinical Science	89	4		447--452	1995	Lab. Neurobiologie des Regulations, CNRS URA 1860, College de France, 11 place M Berthelot, 75231 Paris cedex 05, France		https://www.scopus.com/inward/record.uri?eid=2-s2.0-0028847157&doi=10.1042%2Fcs0890447&partnerID=40&md5=71c52558bc83b0ba2d80900d77b5b562												Cited By :12 Export Date: 12 October 2021	1. Dystrophin-deficient hindlimb muscles of mdx mice undergo necrosis at the time of weaning when the motor activity of the mice greatly increases and muscle energy metabolism becomes more dependent on insulin and carbohydrates. 2. We have attempted to determine if the onset of myofibre necrosis in mdx mice at the time of weaning is related to the development of motor activity and/or the change i…		Diet,Dystrophin,Eccentric contraction,Myofibre type,Necrosis,Regeneration,mdx
MORRISSEY1995	RESISTANCE TRAINING MODES - SPECIFICITY AND EFFECTIVENESS	MEDICINE AND SCIENCE IN SPORTS AND EXERCISE	27	5		648--660	1995																There is considerable demand for information on the effectiveness of various resistance exercises for improving physical performance, and on how exercise programs must match functional activities to produce the greatest performance gains (training specificity). Evidence supports exercise-type specificity; the greatest training effects occur when the same exercise type is used for both resting and…
MOSONI1995	ALTERED RESPONSE OF PROTEIN-SYNTHESIS TO NUTRITIONAL STATE AND ENDURANCE TRAINING IN OLD RATS	AMERICAN JOURNAL OF PHYSIOLOGY-ENDOCRINOLOGY AND METABOLISM	268	2		E328--E335	1995																This study was undertaken to determine whether the loss of muscle protein mass during aging could be explained by a reduced sensitivity of muscle protein synthesis to feeding and exercise. Male Wistar rats aged 12 and 24 mo were exercised by treadmill running for 4 mo. Protein synthesis was measured by the flooding dose method in tibialis anterior, soleus, and liver of conscious rested, trained r…
NICHOLS1995	EFFECTS OF RESISTANCE TRAINING ON MUSCULAR STRENGTH AND FUNCTIONAL ABILITIES OF COMMUNITY-DWELLING OLDER ADULTS	JOURNAL OF AGING AND PHYSICAL ACTIVITY	3	3		238--250	1995																This study examined the efficacy of a progressive resistance exercise program, using equal concentric/eccentric (CE) or greater eccentric/concentric (GE) workloads, for increasing strength and improving functional abilities of community-dwelling older adults. Sixty men and women were randomly assigned to one of three groups: CE, GE, or control. All strength testing and training took place on six …
Reilly1995	Effects of time of day on self-paced performances of prolonged exercise.	The Journal of sports medicine and physical fitness	35	2	jun	99--102	1995																Pre-exercise body temperature varies throughout the day due to its circadian rhythm. This study aimed to compared responses to sustained exercise in the morning and in evening. Rectal temperature was measured pre-exercise and throughout a 60 min test on a cycle ergometer against a fixed frictional resistance in seven males (aged 19-24 years). The subjects were instructed to work as hard as possib…		Adult,Body Temperature,Body Temperature Regulation,Circadian Rhythm,Environment,Exercise Test,Humans,Male,Physical Endurance,Physical Exertion,Psychomotor Performance,Rectum,Temperature,Weight Loss,physiology
Saxton1995	Neuromuscular dysfunction following eccentric exercise.	Medicine and science in sports and exercise	27	8	aug	1185--1193	1995																This study examined the effects of exercise-induced muscle damage on tremor and proprioception components of neuromuscular function. Six male and six female volunteers (aged 18-30 yr) performed 50 maximal eccentric muscle actions using the forearm flexors of the nondominant arm. Forearm flexor tremor and perception of voluntary force and joint position were monitored to assess changes in neuromus…		Adolescent,Adult,Analysis of Variance,Creatine Kinase,Elbow Joint,Exercise,Female,Forearm,Humans,Male,Muscle Contraction,Muscle, Skeletal,Neuromuscular Diseases,Neuromuscular Junction,Pain,Perception,Proprioception,Range of Motion, Articular,Reproducibility of Results,Sensation Disorders,Tremor,blood,etiology,innervation,pathology,physiology,physiopathology
SCUTTER1995	EFFECTS OF VARIOUS ISORESISTIVE TRAINING-PROGRAMS ON TRUNK MUSCLE PERFORMANCE	CLINICAL BIOMECHANICS	10	7		379--384	1995																Isoresistive movements provide a functional method of testing muscle performance and of providing exercise; the resistance applied is usually a percentage of the maximal isometric torque which can be developed by individual subjects. The aim of the current study was to compare the effectiveness of dynamic isoresistive exercise programmes using 25, 50 or 75% of the maximum isometric flexion torque…
Styf1995	Intramuscular pressure and torque during isometric, concentric and eccentric muscular activity.	Scandinavian journal of medicine & science in sports	5	5	oct	291--296	1995																Intramuscular pressures, electromyography (EMG) and torque generation during isometric, concentric and eccentric maximal isokinetic muscle activity were recorded in 10 healthy volunteers. Pressure and EMG activity were continuously and simultaneously measured side by side in the tibialis anterior and soleus muscles. Ankle joint torque and position were monitored continuously by an isokinetic dyna…		Adult,Electromyography,Exercise,Humans,Leg,Male,Middle Aged,Muscle Contraction,Muscle, Skeletal,Pressure,physiology
SVANTESSON1995	STRETCH-SHORTENING CYCLE DURING PLANTAR FLEXION IN YOUNG AND ELDERLY WOMEN AND MEN	EUROPEAN JOURNAL OF APPLIED PHYSIOLOGY AND OCCUPATIONAL PHYSIOLOGY	71	5		381--385	1995																The stretch-shortening cycle (SSC) is a combination of eccentric and concentric muscle actions. The purpose of the study was to compare the SSC of four different groups comprising a total of 29 women and 30 men, divided according to sex and age (i.e. 20-40 years and 70-85 years). A KIN-COM dynamometer was used for strength measurements of the plantar flexion of the right foot. An electromyogram (…
Tarasoutchi1995	[Postoperative course of left ventricular function in aortic insufficiency].	Arquivos brasileiros de cardiologia	65	2	aug	147--152	1995																PURPOSE: To analyze the follow-up of left ventricular function (LVF) after surgical correction of severe chronic aortic insufficiency (AI). METHODS: Twenty-one out of 68 patients with AI, initially asymptomatic and that developed symptoms during the follow-up period of 24-36 months, were studied. Relationship between symptoms and LVF by echocardiogram and radioisotopic ventriculography at rest an…		Adult,Aortic Valve Insufficiency,Chronic Disease,Echocardiography, Doppler,Exercise Test,Female,Follow-Up Studies,Humans,Male,Middle Aged,Prognosis,Radionuclide Ventriculography,Stroke Volume,Ventricular Function, Left,physiology
Tischler1995	Relation between left ventricular shape and Doppler filling parameters in patients with left ventricular dysfunction secondary to coronary artery disease.	The American journal of cardiology	76	8	sep	553--556	1995																Left ventricular (LV) shape is an independent predictor of exercise capacity in patients with systolic LV dysfunction. Recent studies suggest that end-systolic LV shape is related to the generation of restoring forces during contraction that facilitate filling at lower LV pressure during subsequent diastole. To test the hypothesis that preservation of a more elliptical LV shape would be associate…		Aged,Confidence Intervals,Coronary Disease,Echocardiography,Echocardiography, Doppler, Color,Female,Heart Ventricles,Humans,Least-Squares Analysis,Linear Models,Male,Middle Aged,Ventricular Dysfunction, Left,complications,diagnostic imaging,etiology,methods,physiopathology,statistics & numerical data
Alfredson1996	T.; Lorentzon	R."	Chronic Achilles tendinitis and calf muscle strength.	The American journal of sports medicine	24	6		829--833	1996																We evaluated 10 men and 3 women (mean age, 44 +/- 8.5 years) with chronic Achilles tendinitis who underwent surgical treatment. Surgery was followed by immobilization in a weightbearing below-the-knee plaster cast for 6 weeks and a stepwise increasing strength training program. We prospectively studied calf muscle strength on the injured and noninjured sides preoperatively and at 16, 26, and 52 w…		Achilles Tendon,Adult,Chronic Disease,Female,Humans,Leg,Male,Middle Aged,Muscle, Skeletal,Prospective Studies,Tendinopathy,physiology,rehabilitation,surgery
Barnett1996	Relationship between gear ratio and 10-s sprint cycling on an air-braked ergometer	EUROPEAN JOURNAL OF APPLIED PHYSIOLOGY AND OCCUPATIONAL PHYSIOLOGY	72	5-6		509--514	1996																This investigation examined the relationship between gear ratio and peak and mean power outputs (PPO and MPO) and peak cadence (PC) during a 10-s all-out sprint on a multi-geared air-braked cycle ergometer. Ten physically active men [mean age 21.0 years (SEM 0.7)] performed in random order six 10-s sprints (15-min rest between each sprint) on two occasions (48 h apart) in six different gear ratio…
Eisinger1996	Effect of lumbar orthotics on trunk muscle strength.	American journal of physical medicine & rehabilitation	75	3		194--197	1996																Weakening of the trunk muscles is thought to be one disadvantage of prolonged lumbar orthotic use. This study examines weakness of the trunk flexor and extensor muscles in patients who are wearing lumbar orthotics for extended periods. Strength of the trunk flexor and trunk extensor muscles was tested in 24 individuals, using the Kinetic computer. Both concentric and eccentric forces were recorde…		Adult,Aged,Female,Humans,Low Back Pain,Lumbosacral Region,Male,Middle Aged,Muscle Contraction,Orthotic Devices,Statistics, Nonparametric,Thorax,adverse effects,physiology,physiopathology
Eston1996	Muscle tenderness and peak torque changes after downhill running following a prior bout of isokinetic eccentric exercise	JOURNAL OF SPORTS SCIENCES	14	4		291--299	1996																Unaccustomed exercise (usually of an eccentric nature) is often followed by delayed onset muscle soreness (DOMS). Previous studies have found that prior eccentric activity produces a training effect which reduces DOMS and morphological changes. The aim of this study was to examine the effects of a prior bout of maximal isokinetic eccentric exercise on DOMS, strength loss and plasma creatine kinas…
Franklin1996	Assessment of exercise-induced minor muscle lesions: The accuracy of Cyriax's diagnosis by selective tension paradigm	JOURNAL OF ORTHOPAEDIC & SPORTS PHYSICAL THERAPY	24	3		122--129	1996																The Cyriax selective tension assessment paradigm is commonly used by clinicians for the diagnosis of soft tissue lesions; however, studies have not demonstrated that it is a valid method. The purpose of this study was to examine the construct validity of the active motion, passive motion, resisted movement and palpation components of the Cyriax selective tension diagnosis paradigm in subjects wit…
Galloway1996	Age and sports participation: The effect of aging on muscle function and athletic performance	Sports Medicine and Arthroscopy Review	4	3		221--234	1996	Yale Sports Medicine Center, Dept. of Orthopaedics and Rehab., Yale University School of Medicine, New Haven, CT, United States		https://www.scopus.com/inward/record.uri?eid=2-s2.0-3343001844&doi=10.1097%2F00132585-199600430-00003&partnerID=40&md5=0928a8b7d0febf5781f495ceddf237e3												Cited By :2 Export Date: 12 October 2021	As life expectancy increases, record numbers of people are remaining active well into their later years. Counseling these individuals with regard to the prevention of sport-related musculoskeletal injuries and treating injuries when they do occur demands an understanding of age-related changes within the musculoskeletal system. It is now known that a significant component of what was once believe…		Aging,Athlete,Atrophy,Muscle
Galrinho1996	Influence of coronary lesions morphology on treadmill exercise stress testing after acute myocardial infarction.	Revista portuguesa de cardiologia : orgao oficial da Sociedade Portuguesa de Cardiologia = Portuguese journal of cardiology : an official journal of the Portuguese Society of Cardiology	15	3	mar	181--182,217--222	1996																OBJECTIVES: To evaluate the influence of infarct related artery lesion morphology on the exercise stress test performed after a first myocardial infarction. METHODS: We reviewed coronary angiography and the exercise stress test performed before discharge from hospital in 105 consecutive patients (91.4% male, mean age 49.6 +/- 9.2 years) with first acute myocardial infarction. Complex coronary les…	using Bruce protocol	were reviewed. The following parameters were analyzed: exercise time	number of metabolic equivalent units (METS)	maximal heart rate attained
Giamberardino1996	Effects of prolonged L-carnitine administration on delayed muscle pain and CK release after eccentric effort	INTERNATIONAL JOURNAL OF SPORTS MEDICINE	17	5		320--324	1996																Eccentric muscle effort is known to induce delayed muscle soreness (DOMS) and muscle damage which are not responsive to medical treatment with the most common analgesic agents. The aim of the study was to investigate the effects of oral L-carnitine supplementation on pain (VAS scale), tenderness (pain thresholds) and CK release induced by a 20-min eccentric effort of the quadriceps muscle. A sing…
Higbie1996	Effects of concentric and eccentric training on muscle strength, cross-sectional area, and neural activation	JOURNAL OF APPLIED PHYSIOLOGY	81	5		2173--2181	1996																We compared the effects of concentric (Con) and eccentric (Ecc) isokinetic training on quadriceps muscle strength, cross-sectional area, and neural activation. Women (age 20.0 +/- 0.5 yr) randomly assigned to Con training (CTG; n = 16), Ecc training (ETG; n = 19), and control (CG; n = 19) groups were tested before and after 10 wk of unilateral Con or Ecc knee-extension training. Average torque me…
Hortobagyi1996	Greater initial adaptations to submaximal muscle lengthening than maximal shortening	JOURNAL OF APPLIED PHYSIOLOGY	81	4		1677--1682	1996																The purpose of this study was to compare the short-term strength and neural adaptations to eccentric and concentric training at equal force levels. Forty-two sedentary women (age = 21.5 yr) were ranked based on the initial quadriceps strength score, and trios of subjects were randomly assigned to either an eccentric (n = 14), a concentric (n = 14), or a nonexercising control group (n = 14). Train…
Hortobagyi1996a	Fatigue effects on muscle excitability	INTERNATIONAL JOURNAL OF SPORTS MEDICINE	17	6		409--414	1996																Repeated isometric or shortening contractions of skeletal muscle cause muscle fatigue but several prior studies have reported an apparent absence of muscle fatigue when humans performed up to 70 lengthening contractions. We pursued the hypothesis that perhaps muscle excitability is a factor that aids force preservation with repeated eccentric actions, Soleus compound muscle action potential (M-wa…
Housh1996	Effects of eccentric-only resistance training and detraining	INTERNATIONAL JOURNAL OF SPORTS MEDICINE	17	2		145--148	1996																The purposes of this investigation were to examine the efects of unilateral eccentric-only dynamic constant external resistance (DCER) training of the leg extensor muscles on: (a) eccentric DCER strength in the trained and untrained limbs, (b) concentric isokinetic leg extension peak torque-velocity curves in the trained and untrained limbs, and (c) retention of eccentric DCER strength and concen…
Keating1996	The influence of subject and test design on dynamometric measurements of extremity muscles	PHYSICAL THERAPY	76	8		866--889	1996																In the context of broader discussions of clinical dynamometry, earlier reviews have raised concerns about the potential effects of variations in subject factors and test procedures on measurements. None, however, have dealt exclusively with these effects. We therefore reviewed more than 200 articles to evaluate in detail the effects of variations in subject factors and test procedures on measurem…
Kramer1996	Static and dynamic strength of the shoulder rotators in healthy, 45- to 75-year-old men and women.	The Journal of orthopaedic and sports physical therapy	24	1	jul	11--18	1996																Although clinicians routinely treat patients > 45 years of age and use ratio data in making treatment decisions, the reliability of performance of these individuals and the potential utility of ratio data are unclear. The purposes of the present study were to examine the reliability of peak torques and external/internal rotation (ER/IR) ratios for static, dynamic-concentric, and dynamic-eccentric…		Aged,Aging,Female,Humans,Male,Middle Aged,Muscle Contraction,Muscle, Skeletal,Posture,Range of Motion, Articular,Reproducibility of Results,Rotation,Shoulder Joint,Stress, Mechanical,Torque,physiology
Mair1996	Cardiac troponin I in the diagnosis of myocardial injury and infarction.	Clinica chimica acta; international journal of clinical chemistry	245	1	feb	19--38	1996																We used a cardiospecific enzymoimmunometric assay to measure cardiac troponin I (cTnI) in samples serially drawn from 78 patients with acute myocardial infarction (AMI), 7 patients with unstable angina (Braunwald class III), 22 multi-traumatized patients, and in 30 athletes after eccentric exercise, as well as in 101 non-traumatic chest pain patients on admission to the emergency department. cTnI…		Adult,Aged,Exercise,Female,Heart Injuries,Humans,Male,Middle Aged,Myocardial Infarction,Myocardium,Sensitivity and Specificity,Thrombolytic Therapy,Troponin,Troponin I,blood,diagnosis,drug therapy,metabolism,physiopathology
Miller1996	Motor-unit behavior in humans during fatiguing arm movements	JOURNAL OF NEUROPHYSIOLOGY	75	4		1629--1636	1996																1. The activity of 40 triceps brachii motor units was recorded from the dominant arms of 9 healthy adult volunteers (age 27.8 +/- 4.3 yr, mean +/- SD) during a fatigue task that included both isometric and anisometric contractions. The fatigue task lasted 8.3 min and consisted of 50 extension and 50 flexion movements of the elbow. Each movement (40 degrees in 0.8 s) was separated by an isometric …
Naimark1996	Cardiac structure and exercise blood pressure in urban and rural Canadian men of Icelandic descent.	American journal of hypertension	9	11	nov	1104--1109	1996																The objective of the study was to determine the relationship between exercise systolic blood pressure (ESBP), during bicycle ergometry, and echocardiographically determined left ventricular structure in rural and urban Canadian men of Icelandic descent. The study was cross-sectional in design. The settings were urban Winnipeg and the rural Interlake District in the province of Manitoba, Canada. S…		Adult,Blood Pressure,Body Mass Index,Cohort Studies,Cross-Sectional Studies,Echocardiography,Exercise,Exercise Test,Heart Rate,Heart Ventricles,Humans,Hypertrophy, Left Ventricular,Iceland,Male,Manitoba,Middle Aged,Multivariate Analysis,Prevalence,Rural Population,Urban Population,diagnostic imaging,epidemiology,ethnology,physiology,physiopathology
Porter1996	A method of measuring standing isokinetic plantar and dorsiflexion peak torques	MEDICINE AND SCIENCE IN SPORTS AND EXERCISE	28	4		516--522	1996																Different methods have been used for concentric (CONC) isokinetic testing of ankle dorsiflexion (DF) and plantar flexion (PF). However, little information is available on either the reliability of these protocols or eccentric (ECC) torque production. As well, previous studies utilized non-weight-bearing test positions. The purpose of this study was to develop a reliable method of testing CONC and…
Sakamoto1996	Creatine kinase release from regenerated muscles after eccentric contractions in rats.	European journal of applied physiology and occupational physiology	73	6		516--520	1996																The purpose of this study was to test the hypothesis that an increase in plasma creatine kinase (CK) activity after eccentric contractions (ECC) would be attenuated in regenerated muscle fibres. Adult male Wistar rats (aged 12-14 weeks) were randomly assigned to a treatment group (n = 14) or a control group (n = 10). In the treatment group, 1.2% barium chloride solution (BaCl2) was injected into …		Animals,Barium Compounds,Chlorides,Creatine Kinase,Isometric Contraction,Male,Muscle Contraction,Muscle, Skeletal,Necrosis,Rats,Rats, Wistar,Regeneration,Torque,blood,drug effects,enzymology,pharmacology,physiology
Sashika1996	Home program of physical therapy: effect on disabilities of patients with total hip arthroplasty.	Archives of physical medicine and rehabilitation	77	3	mar	273--277	1996																OBJECTIVE: To study the effect of a home program of physical therapy. DESIGN: Nonrandomized control trial. SETTING: Home based. PATIENTS: Subjects had total hip arthroplasty (THA) for hip osteoarthritis (hip-OA) without THA failure, or cardiopulmonary, neurological, or cognitive problems. Twenty-three subjects (mean age 63.4 years; mean post-THA period 793 days, 6 to 48 months) were divided into …		Activities of Daily Living,Disabled Persons,Exercise Therapy,Female,Hip Prosthesis,Home Care Services,Humans,Male,Middle Aged,Patient Education as Topic,Program Evaluation,Range of Motion, Articular,Treatment Outcome,methods,rehabilitation
Simons1996	Preschool vision screening: Rationale, methodology and outcome	SURVEY OF OPHTHALMOLOGY	41	1		3--30	1996																Although population outcome studies support the utility of preschool screening for reducing the prevalence of amblyopia, fundamental questions remain about how best to do such screening. Infant photoscreening to detect refractive risk factors prior to onset of esotropia and amblyopia seems promising, but our current understanding of the natural history of these conditions is limited, thus limitin…
SÃ¸gaard1996	Motor control and kinetics during low level concentric and eccentric contractions in man.	Electroencephalography and clinical neurophysiology	101	5	oct	453--460	1996																Motor unit (MU) recruitment patterns were studied in 6 female subjects during dynamic contractions at relative workloads corresponding to 10% maximum voluntary contraction. The contractions consisted of a 20 degree elbow flexion (concentric contraction) and extension (eccentric contraction) and MU action potential trains were recorded from the brachial biceps muscle. The mean angular velocity of …		Action Potentials,Adult,Arm,Elbow,Female,Humans,Middle Aged,Motor Neurons,Muscle Contraction,physiology
Wawrzyniak1996	Effect of closed chain exercise on quadriceps femoris peak torque and functional performance	JOURNAL OF ATHLETIC TRAINING	31	4		335--340	1996																Objective: To determine the effect of a 6-week leg press training program on quadriceps femoris peak torque and lower extremity functional performance. Design and Setting: A 2 x 3 factorial design. A private university-based outpatient physical therapy clinic was used for testing. The university strength and conditioning center was used for training sessions. Subjects: A volunteer sample of thirt…
Wiksten1996	The relationship between muscle and balance performance as a function of age	ISOKINETICS AND EXERCISE SCIENCE	6	2		125--132	1996																Aging is associated with decreases in strength and muscle mass. In addition, the ability to maintain balance decreases with age. Few studies have examined the relationship between isokinetic muscle performance and balance performance. It was the purpose of this study to determine if there is a relationship between muscle and balance performance, and to discover how this relationship is affected b…
Winter1996	Optimized and corrected peak power output during friction-braked cycle ergometry.	Journal of sports sciences	14	6	dec	513--521	1996																Assessments of maximal intensity exercise which determine peak power output on friction-baked cycle ergometers have fallen into two categories: correction procedures which account for changes in momentum of the ergometer's flywheel and optimization procedures which attempt to satisfy muscle force-velocity relationships. The aim of this study was to compare performance in each procedure and so inv…		Adult,Exercise Test,Female,Humans,Male,Regression Analysis,Reproducibility of Results
Arnold1997	A trend analysis of the in vivo quadriceps femoris angle-specific torque-velocity relationship	JOURNAL OF ORTHOPAEDIC & SPORTS PHYSICAL THERAPY	25	5		316--322	1997																To adequately assess isokinetic human muscle performance, it is important for clinicians to understand how the muscle functions across a range of velocities. Thus, the purpose of this study was to re-examine the in vivo quadriceps torque-velocity relationship using trend analysis. Twelve uninjured university-age females performed three concentric and eccentric contractions at velocities of 0, 25,…
Bernier1997	Effect of unilateral functional instability of the ankle on postural sway and inversion and eversion strength	JOURNAL OF ATHLETIC TRAINING	32	3		226--232	1997																Objective: The purpose of this study was to determine if individuals with unilateral functional ankle instability had decreased ability to maintain postural sway, as well as decreased isokinetic eccentric strength of ankle evertors and inverters. Design and Setting: Subjects with no previous history of ankle injury were compared with subjects with functional ankle instability on the following tes…
Bonacci1997	Effects of microcurrent treatment on perceived pain and muscle strength following eccentric exercise	JOURNAL OF ATHLETIC TRAINING	32	2		119--123	1997																Objective: The purpose of this study was to assess the effect of low-volt, microamperage stimulation (LVMAS) on perceived pain and muscle strength following an intense bout of eccentric exercise. Design and Setting: An experimental pretest-posttest control group design was used for the study. The experiment was conducted in the Lower Extremity Research Laboratory at Georgia State University. Subj…
Brown1997	Indices of skeletal muscle damage and connective tissue breakdown following eccentric muscle contractions	EUROPEAN JOURNAL OF APPLIED PHYSIOLOGY	75	4		369--374	1997																Indirect indices of exercise-induced human skeletal muscle damage and connective tissue breakdown were studied following a single bout of voluntary eccentric muscle contractions. Subjects (six female, two male), mean (SD) age 22 (2) years performed a bout of 50 maximum voluntary eccentric contractions of the knee extensors of a single leg. The eccentric exercise protocol induced muscle soreness (…
Brown1997a	Exercise-induced skeletal muscle damage and adaptation following repeated bouts of eccentric muscle contractions.	Journal of sports sciences	15	2	apr	215--222	1997																Repeated bouts of eccentric muscle contractions were used to examine indirect indices of exercise-induced muscle damage and adaptation in human skeletal muscle. Twenty-four subjects (18 females, 6 males) aged 20.0 +/- 1.4 years (mean +/- S.D.) performed an initial bout of either 10 (n = 7), 30 (n = 9) or 50 (n = 8) maximum voluntary eccentric contractions of the knee extensors, followed by a seco…		Adaptation, Physiological,Adult,Analysis of Variance,Creatine Kinase,Exercise,Female,Humans,Isometric Contraction,Male,Muscle Fatigue,Muscle, Skeletal,Physical Exertion,blood,physiology
Calmels1997	Concentric and eccentric isokinetic assessment of flexor-extensor torque ratios at the hip, knee, and ankle in a sample population of healthy subjects.	Archives of physical medicine and rehabilitation	78	11	nov	1224--1230	1997																OBJECTIVE: To establish the relationship between the flexor/extensor torque ratios in the hip, knee, and ankle. DESIGN: Case series. SETTING: Laboratory of a university rehabilitation department. PARTICIPANTS: From a group of 158 healthy volunteers, 138 subjects completed all the tests in concentric mode, and 65 in eccentric mode. MAIN OUTCOME MEASURE: The flexor/extensor torque ratios of the hip…		Adult,Aged,Analysis of Variance,Ankle Joint,Biomechanical Phenomena,Exercise Test,Female,Hip Joint,Humans,Knee Joint,Male,Middle Aged,Muscle Contraction,Physical and Rehabilitation Medicine,Posture,Range of Motion, Articular,Reference Values,Reproducibility of Results,Tensile Strength,Torque,methods,physiology
DeStaso1997	Relationship between drop vertical jump heights and isokinetic measures utilizing the stretch-shortening cycle	ISOKINETICS AND EXERCISE SCIENCE	6	3		175--179	1997																The purpose of this study was to determine how isokinetic eccentric and concentric peak torque/body weight ratios and time to peak torque values relate to drop vertical jump heights in 30 healthy subjects (12 men and 18 women, age = 22.7+/-2.2 yr, ht=169.6+/-8.9 cm, wt=67.2+/-11.9 kg). Drop vertical jumps were performed from a box 50 cm high. Subjects were tested isokinetically on each leg for th…
Enoka1997	Neural adaptations with chronic physical activity.	Journal of biomechanics	30	5	may	447--455	1997																Chronic activity patterns, such as strength training, limb immobilization, and aging, produce marked adaptations in both the muscular and nervous systems. In this brief review, some of the involved mechanisms are examined as they are revealed through studies on the maximality, specificity, and pattern of the neural drive to muscle. The studies on maximality indicate that it is difficult to activa…		Adaptation, Physiological,Animals,Humans,Motor Neurons,Muscle Contraction,Muscles,Nervous System Physiological Phenomena,Physical Exertion,Time Factors,physiology
Fielding1997	Aging and the acute phase response to exercise: Implications for the role of systemic factors on skeletal muscle protein turnover	INTERNATIONAL JOURNAL OF SPORTS MEDICINE	18	2nd Symposium of the International Society of Exercise and Immunology		S22--S27	1997																Declines in exercise capacity throughout an individual's life span can affect function and can ultimately limit the ability to perform activities of daily living. Along with these changes in exercise capacity and function, studies have reported age-associated changes in several parameters of immune status including declines in cell-mediated and humoral immunity. Exercise has been shown repeatedly…
Gur1997	H."	Concentric and eccentric isokinetic measurements in knee muscles during the menstrual cycle: A special reference to reciprocal moment ratios	ARCHIVES OF PHYSICAL MEDICINE AND REHABILITATION	78	5	may	501--505	1997																Objective: To investigate the effects of menstrual cycle on the reliability of concentric (CON) and eccentric (ECC) isokinetic measurements and reciprocal moment ratios in knee muscles. Design: Repeated measurements. Setting: A university exercise physiology laboratory. Participants: Sixteen healthy sedentary women volunteers, aged 24 to 35 years, who had regular menstrual cycle (ranging from 24 …		,Adult,Female,Humans,Knee,Menstrual Cycle,Muscle,Muscle Contraction,Muscle Fatigue,Reproducibility of Results,Skeletal,physiology
Hakkinen1997	K.; Kraemer	W. J.; Newton	R. U."	Muscle activation and force production during bilateral and unilateral concentric and isometric contractions of the knee extensors in men and women at different ages.	Electromyography and clinical neurophysiology	37	3		131--142	1997																In experiment I ten young men (29 +/- 3 yrs; M30), 12 middle-aged men (50 +/- 4 yrs; M50) and 12 women (48 +/- 5 yrs; W50), 12 elderly men (67 +/- 4 yrs; M70) and 12 women (68 +/- 4 yrs; W70) volunteered for subjects for examination of maximal 1 RM strength and electromyographic activity of the knee extensor muscles during the bilateral and unilateral concentric contraction on a variable resistan…
Heupler1997	Increased left ventricular cavity size, not wall thickness, potentiates myocardial ischemia.	American heart journal	133	6	jun	691--697	1997																Left ventricular (LV) hypertrophy increases the vulnerability of the myocardium to ischemia. The purpose of this study was to determine whether LV diameter or wall thickness was the principal determinant of the effect of LV mass on the development of ischemia, measured by exercise thallium perfusion imaging, in a population with coronary artery disease (CAD). We studied 109 patients with CAD but …		Coronary Angiography,Coronary Circulation,Coronary Disease,Diastole,Echocardiography,Electrocardiography,Exercise Test,Female,Forecasting,Heart Ventricles,Humans,Hypertrophy, Left Ventricular,Male,Middle Aged,Myocardial Ischemia,Myocardium,Odds Ratio,Radionuclide Imaging,Radiopharmaceuticals,Regression Analysis,Stroke Volume,Thallium Radioisotopes,complications,diagnostic imaging,etiology,patholo…
Ide1997	Muscle damage occurring in wheelchair sports people	SPINAL CORD	35	4		234--237	1997																Seven college-age healthy men exercised on a wheelchair treadmill to evaluate muscle damage that may occur from wheelchair propulsion. An experimental model in which a participant performs up-hill running in a wheelchair was prepared. Plasma creatinekinase (CK), myoglobin (Mb) and lactatedehydrogenase (LDH) were measured as parameters. Blood samples were taken pre-, immediately after-, 24 h after…
Kankaanpaa1997	Lumbar paraspinal muscle fatigability in repetitive isoinertial loading: EMG spectral indices, Borg scale and endurance time	EUROPEAN JOURNAL OF APPLIED PHYSIOLOGY AND OCCUPATIONAL PHYSIOLOGY	76	3		236--242	1997																The purpose of this study was to develop a submaximal repetitive isoinertial back muscle endurance test by defining the relationships between the power spectral indices of paraspinal muscle electromyographic (EMG) activities, endurance time and a subjective estimate of fatigue (Borg scale). Bilateral surface EMG recordings were obtained over the lumbar paraspinal muscles in ten individuals who we…
Kimura1997	The effect of cryotherapy on eccentric plantar flexion peak torque and endurance	JOURNAL OF ATHLETIC TRAINING	32	2		124--126	1997																Objective: The effects of cryotherapy on eccentric torque production and muscle endurance have been controversial. Our intent was to examine the effect of cryotherapy on isokinetic eccentric plantar flexion peak torque at 30 degrees/sec and 120 degrees/sec and on endurance al 120 degrees/sec. Design and Setting: Subjects were tested on an isokinetic dynamometer for peak torque and endurance and w…
Knudson1997	Upper extremity angular kinematics of the one-handed backhand drive in tennis players with and without tennis elbow.	International journal of sports medicine	18	2	feb	79--82	1997																Wrist and elbow angular kinematics and racket acceleration at impact were measured in the tennis one-handed back-hand drive for three groups of players: Professionals with no history of tennis elbow (PRO), intermediates with no history of tennis elbow (- TE), and intermediates with a history of tennis elbow (+ TE). Electrogoniometer, strain gauge, and accelerometer signals were sampled for thirty…		Acceleration,Adult,Analysis of Variance,Elbow Joint,Electrodiagnosis,Hand Strength,Humans,Male,Middle Aged,Movement,Muscle Contraction,Muscle, Skeletal,Signal Processing, Computer-Assisted,Stress, Mechanical,Tennis,Tennis Elbow,Wrist Joint,education,physiology,physiopathology
Porter1997	Standing strength training of the ankle plantar and dorsiflexors in older women, using concentric and eccentric contractions.	European journal of applied physiology and occupational physiology	76	1		62--68	1997																Many studies have reported strength gains in older adults following high-intensity resistance training. However, the muscle contraction types examined have been primarily isometric (static) or concentric (CONC; shortening). Less is known about how eccentric (ECC) strength in older adults responds to training or about the efficacy of ECC contractions as training stimuli in these subjects, even tho…		Aged,Aging,Ankle,Exercise,Female,Humans,Muscle Contraction,Posture,physiology
Reaburn1997	Serum testosterone response to high-intensity resistance training in male veteran sprint runners	JOURNAL OF STRENGTH AND CONDITIONING RESEARCH	11	4		256--260	1997																The purpose of this study was to examine the influence of an g-wk high-intensity resistance training program on muscular strength and basal serum testosterone in male veteran sprint runners. Twelve healthy veteran sprint runners, ages 45-79, were recruited as subjects and randomly assigned to an experimental (n = 8) or control (n = 4) group. Measured in both groups before and after the resistance…
Rooyackers1997	Ventilatory response to positive and negative work in patients with chronic obstructive pulmonary disease.	Respiratory medicine	91	3	mar	143--149	1997																In healthy subjects, oxygen consumption and cardiorespiratory responses are lower during eccentric exercise (negative work, Wneg) than during concentric exercise (positive work, Wpos) at the same work load. The aim of the present study was to investigate the ventilatory response to Wneg in patients with chronic obstructive pulmonary disease (COPD). The study population consisted of 12 subjects wi…		Carbon Dioxide,Exercise,Exercise Test,Female,Forced Expiratory Volume,Humans,Lung,Lung Diseases, Obstructive,Male,Middle Aged,Oxygen Consumption,metabolism,methods,physiology,physiopathology
Rooyackers1997a	Potassium and ventilation during positive and negative work in patients with chronic obstructive pulmonary disease.	Clinical physiology (Oxford, England)	17	5	sep	475--485	1997																In patients with chronic obstructive pulmonary disease (COPD), reduced ventilatory reserves limit exercise tolerance. In these patients, the ventilatory requirements of eccentric exercise (negative work, Wneg) are lower than those of concentric exercise (positive work, Wpos) at similar workloads. In this study, we investigated the relationship between plasma potassium levels and ventilation durin…		Adult,Aged,Carbon Dioxide,Exercise,Exercise Test,Female,Humans,Kinetics,Lung Diseases, Obstructive,Male,Middle Aged,Potassium,Respiration,Respiratory Mechanics,blood,physiology,physiopathology
Smith1997	Mechanomyographic responses to maximal eccentric isokinetic muscle actions	JOURNAL OF APPLIED PHYSIOLOGY	82	3		1003--1007	1997																The purpose of the present investigation was to examine the mechanomyographic (MMG) responses to maximal eccentric isokinetic muscle actions. Eight adult male volunteers [age 22 +/- 2 (SD) yr] performed maximal eccentric muscle actions of the leg extensors at 60, 90, 120, and 180 degrees/s on a Cybex 6000 isokinetic dynamometer. MMG was detected by a piezoelectric crystal contact sensor placed ov…
Spina1997	Exercise training enhances cardiac function in response to an afterload stress in older men.	The American journal of physiology	272	2 Pt 2	feb	H995--1000	1997																This study was designed to characterize cardiac adaptations to endurance exercise training in older healthy men by evaluation of changes in left ventricular function in response to an afterload stress in the presence of cardiac muscarinic receptor blockade. Eight men 65 +/- 2 (SE) yr old underwent 9 mo of endurance exercise training. Maximal O2 uptake (V(O2 max)) was determined during treadmill e…		Aged,Aging,Blood Pressure,Body Composition,Cardiotonic Agents,Coronary Circulation,Echocardiography,Exercise,Heart,Heart Rate,Humans,Male,Middle Aged,Muscarinic Antagonists,Myocardium,Phenylephrine,Physical Education and Training,Physical Endurance,Physical Fitness,Ventricular Function, Left,drug effects,metabolism,pharmacology,physiology
Tarter1997	Isokinetic muscle strength and its association with neuropsychological capacity in cirrhotic alcoholics.	Alcoholism, clinical and experimental research	21	2	apr	191--196	1997																Alcoholic cirrhotics (n = 49), nonalcoholic cirrhotics (n = 42), and normal controls (n = 50) were compared on measures of isokinetic muscle strength and neuropsychological capacity. Alcoholic cirrhotics were deficient on measures of eccentric and concentric muscle movements, compared with normal controls but were not different from nonalcoholic cirrhotics. Nor were differences observed between t…		Adult,Diagnosis, Differential,Exercise Test,Female,Hepatic Encephalopathy,Humans,Isometric Contraction,Liver Cirrhosis,Liver Cirrhosis, Alcoholic,Male,Middle Aged,Neuropsychological Tests,Psychomotor Performance,diagnosis,etiology,instrumentation,physiology,physiopathology
Thomee1997	A comprehensive treatment approach for patellofemoral pain syndrome in young women	PHYSICAL THERAPY	77	12	dec	1690--1703	1997																Background and Purpose. The purposes of this study were (1) to evaluate a comprehensive treatment approach for patients with patellofemoral pain syndrome and (2) to compare a training program using isometric muscle contractions with a training-program using eccentric muscle contractions. Subjects. Forty female patients with patellofemoral pain syndrome, aged 15 to 28 years ((X) over bar = 20.2, S…		,Adolescent,Adult,Electromyography,Exercise,Exercise Therapy,Female,Follow-Up Studies,Humans,Knee Joint,Muscle,Pain Management,Pain Measurement,Skeletal,Syndrome,Torque,Treatment Outcome,methods
Zamparo1997	Effects of elastic recoil on maximal explosive power of the lower limbs	EUROPEAN JOURNAL OF APPLIED PHYSIOLOGY AND OCCUPATIONAL PHYSIOLOGY	75	4		289--297	1997																The maximal explosive power during a two legs jump was measured on four competitive athletes [mean age 24 (SD 4.3) years, height 1.79 (SD 0.09) m; body mass 68.7 (SD 12.8) kg] at different starring knee angles (70, 90, 110, 130 and 150 degrees). The experiments were performed on a newly developed instrument with which both force and speed could be measured using a force platform and a wire tachom…
Alfredson1998	High thigh muscle strength but not bone mass in young horseback-riding females	CALCIFIED TISSUE INTERNATIONAL	62	6		497--501	1998																To evaluate whether the type of weight-bearing loading subjected to the skeleton during horseback-riding was associated with differences in bone mass and muscle strength of the thigh, we investigated bone mass and isokinetic muscle strength in 20 female horse riders (age 17.9 +/- 0.6 years) who were riding 7.0 +/- 3.4 hours/week, and 20 nonactive females (age 17.8 +/- 1.1 years). The groups were …
Alfredson1998a	P.; Lorentzon	R."	Prolonged progressive calcaneal bone loss despite early weightbearing rehabilitation in patients surgically treated for Achilles tendinosis.	Calcified tissue international	62	2	feb	166--171	1998																We prospectively evaluated areal bone mineral density (BMD) of the calcaneus and calf-muscle strength (concentric and eccentric plantar flexion peak torque in Nm) in 10 recreational athletes (5 males and 5 females), mean age 40.9 years (range 26-55), who were selected to undergo surgical treatment for chronic Achilles tendinosis localized at the 2-6 cm level. Surgery was followed by immobilizatio…		Absorptiometry, Photon,Achilles Tendon,Adult,Bone Density,Bone Resorption,Calcaneus,Female,Humans,Male,Middle Aged,Pain Measurement,Prospective Studies,Retrospective Studies,Sports,Tendinopathy,Weight-Bearing,diagnostic imaging,physiology,physiopathology,rehabilitation,surgery
Alfredson1998b	T.; Jonsson	P.; Lorentzon	R."	Heavy-load eccentric calf muscle training for the treatment of chronic Achilles tendinosis.	The American journal of sports medicine	26	3		360--366	1998																We prospectively studied the effect of heavy-load eccentric calf muscle training in 15 recreational athletes (12 men and 3 women; mean age, 44.3 +/- 7.0 years) who had the diagnosis of chronic Achilles tendinosis (degenerative changes) with a long duration of symptoms despite conventional nonsurgical treatment. Calf muscle strength and the amount of pain during activity (recorded on a visual anal…
Alfredson1998c	Achilles tendinosis and calf muscle strength - The effect of short-term immobilization after surgical treatment	AMERICAN JOURNAL OF SPORTS MEDICINE	26	2		166--171	1998																We prospectively studied calf muscle strength in 7 men and 4 women (mean age, 40.9 +/- 10.1 years) who had surgical treatment for chronic Achilles tendinosis. Surgery was followed by immobilization in a weightbearing below-the-knee plaster cast for 2 weeks followed by a stepwise increasing strength training program. Strength measurements (peak torque and total work) were done preoperatively (Week…
Avela1998	Reduced stretch reflex sensitivity and muscle stiffness after long-lasting stretch-shortening cycle exercise in humans.	European journal of applied physiology and occupational physiology	78	5	oct	403--410	1998																It has been suggested that during repeated long-term stretch-shortening cycle (SSC) exercise the decreased neuromuscular function may result partly from alterations in stiffness regulation. Therefore, interaction between the short latency stretch-reflex component (M1) and muscle stiffness and their influences on muscle performance were investigated before and after long lasting SSC exercise. The …		Adult,Electromyography,H-Reflex,Humans,Male,Middle Aged,Muscle Contraction,Muscle Fatigue,Muscle, Skeletal,Physical Exertion,Reflex, Stretch,Weight-Bearing,physiology
Bellew1998	Gender specificity in the correlation of strength and self-perceived level of physical activity across three age groups	ISOKINETICS AND EXERCISE SCIENCE	7	2		61--66	1998																Objective: To assess gender differences in the correlation between score on a questionnaire of self-perceived level of physical activity and rank on a test of strength between males and females in three age-groups. Design: Sixty subjects in gender-age groups 20-29, 40-49, and 60-69 years of age. Each completed a self-assessment questionnaire of physical activity prior to isokinetic testing of qua…
Bellew1998a	Gender specificity in the age-related decline of strength: concentric versus eccentric	ISOKINETICS AND EXERCISE SCIENCE	7	1		1--9	1998																Objective: To assess gender specific differences in the decline of quadriceps strength under concentric and eccentric conditions. Design: Sixty volunteer subjects clear of musculoskeletal pathology were gender matched to three age groups (20-29, 40-49, and 60-69) with ten subjects in each gender-age group. Subjects performed concentric and eccentric knee extension at 60 degrees . s(-1) and 120 de…
Demer1998	Vision and vestibular adaptation.	Otolaryngology--head and neck surgery : official journal of American Academy of Otolaryngology-Head and Neck Surgery	119	1	jul	78--88	1998																This article summarizes six recent degree-of-freedom studies of visual-vestibular interaction during natural activities and relates the findings to canal-otolith interactions evaluated during eccentric axis rotations. Magnetic search coils were used to measure angular eye and head movements of young and elderly subjects. A flux gate magnetometer was used to measure three-dimensional head translat…		Adaptation, Physiological,Adult,Age Factors,Aged,Eye Movements,Fixation, Ocular,Head Movements,Humans,Magnetics,Otolithic Membrane,Reflex, Vestibulo-Ocular,Rotation,Running,Semicircular Canals,Vestibule, Labyrinth,Walking,physiology
Gleeson1998	Effect of exercise-induced muscle damage on the blood lactate response to incremental exercise in humans.	European journal of applied physiology and occupational physiology	77	3	feb	292--295	1998																Eccentric muscle actions are known to induce temporary muscle damage, delayed onset muscle soreness (DOMS) and muscle weakness that may persist for several days. The purpose of the present study was to determine whether DOMS-inducing exercise affects blood lactate responses to subsequent incremental dynamic exercise. Physiological and metabolic responses to a standardised incremental exercise tas…		Adult,Bicycling,Creatine Kinase,Exercise,Female,Humans,Lactic Acid,Male,Muscle Weakness,Muscles,Oxygen Consumption,Pain,Physical Endurance,blood,etiology,physiology
Hayward1998	Response of serum indicators of myocardial infarction following exercise-induced muscle injury.	The American journal of emergency medicine	16	2	mar	107--113	1998																The purpose of this investigation was to determine the response of three parameters used in the assessment of acute myocardial infarction (AMI) after a single bout of eccentric exercise designed to elicit skeletal muscle injury. Total creatine kinase (CK), CK-MB isoenzyme (CK-MB), and the leukocyte differential were determined after a 20-minute bench-stepping exercise in 21 men ranging in age fro…		Adult,Analysis of Variance,Creatine Kinase,Diagnosis, Differential,Exercise Test,False Positive Reactions,Humans,Incidence,Isoenzymes,Leukocyte Count,Lymphocyte Count,Male,Middle Aged,Muscle, Skeletal,Myocardial Infarction,Physical Exertion,Time Factors,blood,diagnosis,enzymology,metabolism,physiology
Hof1998	In vivo measurement of the series elasticity release curve of human triceps surae muscle.	Journal of biomechanics	31	9	sep	793--800	1998																The force-extension characteristic of the series-elastic component of the human triceps surae muscle has been measured in vivo by means of a hydraulic controlled-release ergometer in 12 subjects. The SEC characteristic can be described by a linear relation between muscle moment and extension, with a stiffness K1, preceded by a quadratic 'toe' region at low moments. Stiffness K1 increases with the…		Adult,Ankle Joint,Elasticity,Ergometry,Female,Humans,Leg,Male,Middle Aged,Models, Biological,Muscle, Skeletal,Range of Motion, Articular,Running,Walking,physiology
Hortobagyi1998	Incomplete muscle activation after training with electromyostimulation	CANADIAN JOURNAL OF APPLIED PHYSIOLOGY-REVUE CANADIENNE DE PHYSIOLOGIE APPLIQUEE	23	3		261--270	1998																Training with voluntary or electromyostimulation (EMS)-evoked eccentric contractions should produce complete muscle activation since EMS and eccentric contractions preferentially recruit large motor units. Subjects (22 women ages 18-40) were randomly assigned to a voluntary (VOL; n = 8), EMS (n = 8), or control group. VOL and EMS groups trained the quadriceps at the same, increasing force levels …
Housh1998	Effects of unilateral eccentric-only dynamic constant external resistance training on quadriceps femoris cross-sectional area	JOURNAL OF STRENGTH AND CONDITIONING RESEARCH	12	3		192--198	1998																The purposes of this investigation were to determine the effects of unilateral eccentric-only dynamic constant external resistance (DCER) training on the cross-sectional area (CSA) and strength of the trained and contralateral quadriceps femoris muscles. Sixteen young men (age 24.4 +/- 3.7 yrs) volunteered to serve as subjects and were divided into a training (Tr) group and a control (Con) group.…
Hyatt1998	Creatine kinase release and clearance using MM variants following repeated bouts of eccentric exercise.	Medicine and science in sports and exercise	30	7	jul	1059--1065	1998																PURPOSE: This study investigated the release and clearance of plasma CK-MM (muscle) isoforms following two bouts of eccentric exercise to determine whether enhanced enzyme clearance could in part explain the blunted creatine kinase (CK) response to a second bout of exercise. METHODS: Nonweight trained college-aged male subjects performed both bouts of 50 forced lengthening contractions of the for…		Adult,Analysis of Variance,Creatine Kinase,Exercise,Forearm,Humans,Isoelectric Focusing,Isoenzymes,Isometric Contraction,Male,Muscle, Skeletal,Range of Motion, Articular,anatomy & histology,blood,enzymology,metabolism,physiology
Kaminski1998	Concentric versus enhanced eccentric hamstring strength training: Clinical implications	JOURNAL OF ATHLETIC TRAINING	33	3		216--221	1998																Objective: Hamstring injuries can be quite debilitating and often result in chronic problems. Eccentric muscle actions are often the last line of defense against muscle injury and ligament disruption. Traditionally, the focus of hamstring strength rehabilitation has been on concentric muscle actions. The purpose of our study was to compare hamstring muscle strength gains in concentric and eccentr…
Kovanen1998	Effect of age on collagen metabolism after eccentric contraction-induced muscle damage.	FASEB JOURNAL	12	4 MA - 1133		A195--A195	1998
Krishnan1998	Age-related differences in the pancreatic beta-cell response to hyperglycemia after eccentric exercise.	The American journal of physiology	275	3	sep	E463--70	1998																Eccentric exercise (ECC) causes muscle damage, insulin resistance, and increased pancreatic beta-cell secretion in young individuals. However, the effects of age on the pancreatic beta-cell response to glucose after ECC are unknown. Hyperglycemic clamps (180 min, 10.0 mM) were performed on eight young (age 22 +/- 1 yr) and eight older (age 66 +/- 2 yr) healthy sedentary males without exercise (CO…		Activity Cycles,Adult,Aged,Aging,Blood Glucose,Body Constitution,Body Mass Index,Body Weight,C-Peptide,Creatine Kinase,Exercise,Glucose Clamp Technique,Humans,Hyperglycemia,Insulin,Insulin Secretion,Islets of Langerhans,Male,Middle Aged,Muscle Fatigue,Physical Exertion,Regression Analysis,blood,growth & development,metabolism,physiology,physiopathology
Lachowetz1998	The effect of an intercollegiate baseball strength program on the reduction of shoulder and elbow pain	JOURNAL OF STRENGTH AND CONDITIONING RESEARCH	12	1		46--51	1998																This study examined whether an upper body strength training program would reduce pain levels in intercollegiate baseball players following an intense throwing session. Nineteen varsity players, ages 18 to 22 volunteered for the study as part of their preseason fall practice. Eleven were randomly assigned to the training group and 8 to the control group. After 8 weeks of strength training for the …
Lund1998	Isokinetic eccentric exercise as a model to induce and reproduce pathophysiological alterations related to delayed onset muscle soreness.	Scandinavian journal of medicine & science in sports	8	4	aug	208--215	1998																Physiological alterations following unaccustomed eccentric exercise in an isokinetic dynamometer of the right m. quadriceps until exhaustion were studied, in order to create a model in which the physiological responses to physiotherapy could be measured. In experiment I (exp. I), seven selected parameters were measured bilaterally in 7 healthy subjects at day 0 as a control value. Then after a st…	the normal fluctuations over 8 d of the seven parameters were measured	without intervention with eccentric exercise in 6 other subjects. All subjects experienced pain	reaching a maximum 48 h after eccentric exercise in both exp. I and II. A systematic effect over time for CK (increasing 278% resp. 308%)	muscle strength (decreasing more than 10%)
Lund1998a	The effect of passive stretching on delayed onset muscle soreness, and other detrimental effects following eccentric exercise.	Scandinavian journal of medicine & science in sports	8	4	aug	216--221	1998																The aim of this study was to measure if passive stretching would influence delayed onset muscle soreness (DOMS), dynamic muscle strength, plasma creatine kinase concentration (CK) and the ratio of phosphocreatine to inorganic phosphate (PCr/P(i)) following eccentric exercise. Seven healthy untrained women, 28-46 years old, performed eccentric exercise with the right m. quadriceps in an isokinetic…		Adult,Creatine Kinase,Exercise,Female,Humans,Middle Aged,Muscle, Skeletal,Pain,Phosphates,Phosphocreatine,Time Factors,blood,physiology,physiopathology
MacIntyre1998	Fatigue of the knee extensor muscles following eccentric exercise.	Electromyography and clinical neurophysiology	38	1		3--9	1998																The purposes of this study were to determine the time course of muscle fatigue in the knee extensor muscles following an eccentric exercise protocol, and to determine if the position of the subjects during assessment affected the measurement of muscle fatigue. Twenty-four female subjects were assigned to three groups. All subjects completed baseline measure (pre-exercise test) of a power spectrum…		Adult,Electromyography,Exercise,Female,Humans,Knee,Middle Aged,Muscle Fatigue,Muscle, Skeletal,Posture,Time Factors,Torque,physiology
Manetti1998	Effects of sporting activity on adolescent athletes: Echocardiographic study	Cardiovascular Imaging	10	4		183--186	1998	Inst. Clin. Med. Gen. Cardiologia, Universita degli Studi, Firenze, Italy		https://www.scopus.com/inward/record.uri?eid=2-s2.0-0032321533&partnerID=40&md5=166f7c5e92a348959f3385740b836c56												Export Date: 12 October 2021	Regular training induces changes in body mass and left ventricular mass. While the effects in adults are well known, information about training effects in adolescents is not available. The aim of this study was to evaluate the effects of training in a group of soccer adolescent players. A group of 132 young male athletes (mean age 13.8 Â± 2.3 years) was studied. They have been regularly practisin…
Marinella1998	Exertional rhabdomyolysis after recent coxsackie B virus infection.	Southern medical journal	91	11	nov	1057--1059	1998																Acute, exertional rhabdomyolysis typically follows strenuous exercise of the eccentric type, such as that which occurs during military training or repetitive weight lifting in unconditioned individuals. Complications can be significant and include compartment syndrome and acute renal failure due to myoglobinuria, especially in the setting of volume depletion. Rhabdomyolysis may also be precipitat…		Acute Disease,Anterior Compartment Syndrome,Coxsackievirus Infections,Diagnosis, Differential,Enterovirus B, Human,Exercise,Female,Humans,Middle Aged,Myoglobinuria,Rhabdomyolysis,complications,diagnosis,etiology,physiology
Mayer1998	[Quantification of shoulder power in trained and untrained paraplegic wheelchair athletes].	Sportverletzung Sportschaden : Organ der Gesellschaft fur Orthopadisch-Traumatologische Sportmedizin	12	4	dec	147--151	1998																Shoulder complaints are frequently observed to result from the increased stress to the upper extremities of wheelchair users. The cause may be muscle dysbalances of the stressed musculature, whereby the changed situation in the wheelchair during everyday and athletic exercise is important. To demonstrate the different importance of altered shoulder stress in the wheelchair situation and in additi…		Adult,Humans,Isometric Contraction,Male,Middle Aged,Paraplegia,Physical Education and Training,Range of Motion, Articular,Reference Values,Shoulder,Sports,Torque,Wheelchairs,physiology,physiopathology,rehabilitation
Nilsson1998	Location and stability of a newly established eccentric retinal locus suitable for reading, achieved through training of patients with a dense central scotoma.	Optometry and vision science : official publication of the American Academy of Optometry	75	12	dec	873--878	1998																Six patients, median age 71 years, with a dense central scotoma in one eye and a median visual acuity of 0.06 (20/330) in the same eye, were all (100%) shown by means of fundus photography including a fixation target to preferably use an unfavorable retinal locus for fixation, i.e., within the lesion (scotoma). None of the patients was able to read novel text with the affected eye. A computer and…		Aged,Female,Fixation, Ocular,Humans,Macular Degeneration,Male,Middle Aged,Patient Education as Topic,Reading,Retina,Scotoma,Vision, Low,Visual Acuity,physiology,rehabilitation
Sheehy1998	An electromyographic study of vastus medialis oblique and vastus lateralis activity while ascending and descending steps.	The Journal of orthopaedic and sports physical therapy	27	6	jun	423--429	1998																Imbalances in the firing pattern and contraction intensity of the vastus medialis oblique (VMO) and the vastus lateralis (VL) have been considered important factors contributing to patellofemoral joint dysfunction. Vastus medialis oblique and vastus lateralis electromyographic (EMG) activity were measured for 15 individuals without patellofemoral pain (asymptomatic group) and 13 subjects with pat…		Adolescent,Adult,Biomechanical Phenomena,Child,Electromyography,Female,Femur,Humans,Joint Instability,Knee Joint,Male,Middle Aged,Muscle, Skeletal,Pain,Patella,Walking,etiology,physiology,physiopathology
Smith1998	Treadmill aerobic exercise improves quadriceps strength in patients with chronic hemiparesis following stroke: A preliminary report	JOURNAL OF NEUROLOGIC REHABILITATION	12	3		111--118	1998																Chronic neuromuscular impairments contribute to functional disability following stroke. Despite the widely held notion that only limited gains in motor performance are possible beyond the initial subacute stroke recovery period, we tested the hypothesis that a task-oriented" aerobic treadmill training program would improve lower extremity muscle strength and alter spastic reflexes in chronic hemi…	aged 66 +/- 3 (mean +/- SEM) years	with mild to moderate hemiparesis and gait deviations due to remote stroke (>6 months) were entered in a program of low intensity aerobic exercise (AEX) three times a week. Repeated measures of volitional (eccentric and concentric) and reflexive (spastic) torque generated by the quadriceps muscles were performed bilaterally using isokinetic dynamometry at four angular velocities (30 degrees	60 degrees	90 degrees
Stay1998	Pulsed ultrasound fails to diminish delayed-onset muscle soreness symptoms	JOURNAL OF ATHLETIC TRAINING	33	4		341--346	1998																Objective: We investigated the effects of pulsed ultrasound on swelling, muscle soreness perception, relaxed-elbow extension angle, and muscular strength. Design and Setting: Eight sets of concentric and eccentric actions induced delayed-onset muscle soreness of the elbow flexors. Group 1 received 20% pulsed ultrasound treatments (1-MHz, 7 minutes, 1.5 W/cm(2) temporal peak intensity) twice a day…
Svantesson1998	The standing heel-rise test in patients with upper motor neuron lesion due to stroke.	Scandinavian journal of rehabilitation medicine	30	2	jun	73--80	1998																The objective was to investigate the fatigue process in the triceps surae during the heel-rise test (eccentric and concentric phases) in comparison with a walking test and muscle strength. Eight men with prior stroke and 8 age-matched healthy men participated. The electromyographic activity in form of root mean square and mean power frequency of the gastrocnemius and soleus muscles were measured …		Case-Control Studies,Cerebrovascular Disorders,Electromyography,Heel,Humans,Leg,Male,Middle Aged,Motor Neuron Disease,Muscle Fatigue,Muscle, Skeletal,Physical Exertion,Walking,complications,etiology,physiology,physiopathology
Topaz1998	Acute results, complications, and effect of lesion characteristics on outcome with the solid-state, pulsed-wave, mid-infrared laser angioplasty system: final multicenter registry report. Holmium:YAG Laser Multicenter Investigators.	Lasers in surgery and medicine	22	4		228--239	1998																BACKGROUND AND OBJECTIVE: The solid-state, mid-infrared holmium:YAG laser (2.1 microm wavelength) is a relatively new percutaneous device that has recently been evaluated in a multicenter study. Because of its unique wavelength and photoacoustic effects on atherosclerotic plaques, this laser may be useful in treatment of symptomatic patients with coronary artery disease. This study sought to eval…		Aluminum Silicates,Angina Pectoris,Angina, Unstable,Angioplasty, Balloon, Laser-Assisted,Angioplasty, Laser,Calcinosis,Coronary Artery Bypass,Coronary Artery Disease,Coronary Thrombosis,Coronary Vasospasm,Coronary Vessels,Evaluation Studies as Topic,Female,Forecasting,Graft Occlusion, Vascular,Holmium,Humans,Infrared Rays,Male,Middle Aged,Myocardial Infarction,Recurrence,Registries,Safety,Sapheno…
Trimble1998	Postexercise potentiation of the H-reflex in humans	MEDICINE AND SCIENCE IN SPORTS AND EXERCISE	30	6		933--941	1998																Post-muscle activation effects on segmental reflexes reveal divergent results dependent upon the manner in which the muscle is activated. Electrically activating triceps surae invokes a potentiation of the Achilles; tendon reflex and the soleus (S) H-reflex termed posttetanic potentiation. In contrast, brief volitional activation produces a subsequent potentiation of tendon reflexes, whereas H-re…
Tyrdal1998	The effect of strength training on 'handball goalie's elbow' - a prospective uncontrolled clinical trial	SCANDINAVIAN JOURNAL OF MEDICINE & SCIENCE IN SPORTS	8	1		33--41	1998																'Handball goalie's elbow' is defined as pain due to repetitive forced hyperextension of the elbow. Strength training has been suggested for prevention and rehabilitation of this injury. The present study examines the effect of a strength-training programme after 24 months in a prospective uncontrolled clinical trial in goalkeepers with 'handball goalie's elbow'. Concentric and eccentric elbow exe…
Vilquin1998	Evidence of mdx mouse skeletal muscle fragility in vivo by eccentric running exercise	MUSCLE & NERVE	21	5		567--576	1998																Duchenne muscular dystrophy is an X-linked devastating disease due to the lack of expression of a functional dystrophin. Unfortunately, the dystrophin-deficient mdx mouse model does not present clinical signs of dystrophy before the age of 18 months, and the role of dystrophin in fiber integrity is not fully understood. The fragility of the skeletal muscle fibers was investigated in transgenic mi…
Alfredson1999	P.; Pietil{\"{a}}	T.; Lorentzon	R."	Bone mass in the calcaneus after heavy loaded eccentric calf-muscle training in recreational athletes with chronic achilles tendinosis.	Calcified tissue international	64	5	may	450--455	1999																In an ongoing prospective study of 14 recreational athletes (12 males and 2 females, mean age 44.2 +/- 7.1 years) with unilateral chronic Achilles tendinosis, we investigated the effect of treatment with heavy-loaded eccentric calf-muscle training. Pain during activity (recorded on a VAS scale) and isokinetic concentric and eccentric calf-muscle strength (peak torque at 90 degrees /second and 225…
Brenner1999	Impact of three different types of exercise on components of the inflammatory response	EUROPEAN JOURNAL OF APPLIED PHYSIOLOGY AND OCCUPATIONAL PHYSIOLOGY	80	5		452--460	1999																It was hypothesized that muscle injury would be greater with eccentric than with all-out or prolonged exercise, and that immune changes might provide an indication that supplements the information provided by traditional markers such as creatine kinase (CK) or delayed-onset muscle soreness. Eight healthy males [mean (SE): age = 24.9 (2.3) years, maximum oxygen consumption ((V) over dot O-2max) = …
Chung1999	Cardiopulmonary responses of middle-aged men without cardiopulmonary disease to steady-rate positive and negative work performed on a cycle ergometer.	Physical therapy	79	5	may	476--487	1999																BACKGROUND AND PURPOSE: Understanding physiological responses to negative work allows therapists to be more knowledgeable when they prescribe this form of exercise. The physiological responses of 12 men without cardiopulmonary disease, aged 39 to 65 years (X=49.7, SD=9.3), to negative work (eccentric muscle contractions) and to positive work (concentric muscle contractions) were compared. SUBJECT…		Adult,Aged,Analysis of Variance,Cardiovascular Physiological Phenomena,Energy Metabolism,Exercise Test,Heart Rate,Humans,Lung,Male,Middle Aged,Muscle Contraction,Oxygen Consumption,Pulmonary Ventilation,Tidal Volume,methods,physiology
Coca1999	The impact of different echocardiographic diagnostic criteria on the prevalence of left ventricular hypertrophy in essential hypertension: the VITAE study	JOURNAL OF HYPERTENSION	17	10	oct	1471--1480	1999																Background The prevalence of echocardiographic left ventricular hypertrophy in essential hypertension ranges from 12 to 96% depending on the threshold values used to define it, and on the selection bias. Objective To estimate the prevalence of echocardiographic left ventricular hypertrophy by different criteria in essential hypertensives seen in primary care centres. Methods Cross-sectional study…		,Aged,Cross-Sectional Studies,Female,Humans,Hypertension,Hypertrophy,Left Ventricular,Male,Middle Aged,Prevalence,complications,diagnosis,etiology,physiopathology
Dauty1999	Correlations between spring and quadriceps femoris and hamstrings flexibility and strength.	SCIENCE & SPORTS	14	2		71--76	1999																Introduction.- Competitive volleyball requires powerful spring. Methods.- To improve this skill 22 French athletes underwent jump tests aimed at mimicking this movement. Furthermore, quadriceps and hamstrings flexibility and isokinetic strength were assessed, using a Cybex 6000 dynamometer. Results.- Though negatively correlated with age (r = 0.473), spring is positively correlated with knee flex…
Devereux1999	Left ventricular hypertrophy in hypertension: Stimuli, patterns, and consequences	HYPERTENSION RESEARCH-CLINICAL AND EXPERIMENTAL	22	1		1--9	1999																Left ventricular (LV) size in childhood closely parallels body size, whereas in adulthood LV mass is increasingly affected by effects of obesity, hypertension, the level of cardiac volume load, and the level of LV myocardial contractility. Recently, additional independent associations of diabetes, arterial structure and function and as yet unknown genes with higher LV mass have been defined; angi…
Devor1999	Regeneration of new fibers in muscles of old rats reduces contraction-induced injury	JOURNAL OF APPLIED PHYSIOLOGY	87	2		750--756	1999																Skeletal muscles are injured by their own contractions. Compared with muscles in young animals, those in old animals are injured more easily and more severely and regenerate less well afterward. Injection of a myotoxin (bupivacaine) causes complete degeneration of fibers in extensor digitorum longus (EDL) muscles of rats, followed by full regeneration within 60 days. We tested the specific hypoth…
Duarte1999	Exercise-induced signs of muscle overuse in children	INTERNATIONAL JOURNAL OF SPORTS MEDICINE	20	2		103--108	1999																Signs of overuse after intense muscular exertion are well described in adults, while little research has been conducted in children. The aim of the study was to investigate some indirect markers of muscle damage in 13 years old boys following two different protocols of one-leg stepping exercise to exhaustion. This stepping exercise was performed by two experimental groups with different contribut…
Ellis1999	Relation between lesion characteristics and risk with percutaneous intervention in the stent and glycoprotein IIb/IIIa era: An analysis of results from 10,907 lesions and proposal for new classification scheme.	Circulation	100	19	nov	1971--1976	1999																BACKGROUND: The currently used American College of Cardiology/American Heart Association lesion classification scheme dates from an era when balloon angioplasty was the only percutaneous treatment available and major complications occurred in approximately 7% of patients. Major advances in treatment options would suggest that this scheme may be outmoded, but the schemes that have been suggested t…		Adult,Aged,Angioplasty, Balloon, Coronary,Coronary Vessels,Female,Humans,Male,Middle Aged,Platelet Aggregation Inhibitors,Platelet Glycoprotein GPIIb-IIIa Complex,Risk Assessment,Risk Factors,Stents,adverse effects,antagonists & inhibitors,pathology,therapeutic use
Enns1999	Alterations in sarcoplasmic reticulum function in female vastus lateralis with eccentric exercise.	Molecular and cellular biochemistry	202	1-2	dec	19--30	1999																This study examined the alterations in sarcoplasmic reticulum (SR) Ca2+ sequestration function in homogenates during eccentric exercise and recovery and following additional eccentric exercise, and correlated these alterations with changes in force output. Eight healthy, untrained females, aged 20-25 years, cycled for a total of 60 min on an eccentric cycle ergometer (30 min at 66+/-3% VO2 peak a…		Adult,Calcium,Electric Stimulation,Exercise,Female,Humans,Motor Activity,Muscle Contraction,Muscle, Skeletal,Oxygen Consumption,Reaction Time,Sarcoplasmic Reticulum,Time Factors,metabolism,physiology
Eston1999	Effects of cold water immersion on the symptoms of exercise-induced muscle damage.	Journal of sports sciences	17	3	mar	231--238	1999																Cryotherapy is an effective treatment for acute sports injury to soft tissue, although the effect of cryotherapy on exercise-induced muscle damage is unclear. The aim of this study was to assess the effects of cold water immersion on the symptoms of exercise-induced muscle damage following strenuous eccentric exercise. After performing a bout of damage-inducing eccentric exercise (eight sets of f…		Adult,Creatine Kinase,Cryotherapy,Exercise,Female,Humans,Immersion,Soft Tissue Injuries,Treatment Outcome,enzymology,metabolism,therapy
Grigoricheva1999	Left ventricular functional state in patients with essential hypertension and during various types of left ventricular hypertrophy at rest and isometric handgrip exercise	KARDIOLOGIYA	39	7		17--20	1999																Echocardiograms were obtained from 292 patients with essential hypertension aged 30-59 years (mean 48+/-6,4 years). Mean duration of the disease was 7,6+/-5,9 years. Blood pressure in all patients was above 139/89 mm Hg for at least 1 month prior to the study. One hundred thirty four patients (46%) had stage I essential hypertension and 158 patients - stage II essential hypertension with signs of…
Gur1999	H.; Akova	B.; K{\"{u}}{\c{c}}{\"{u}}koglu	S.; Gur	H.; Akova	B.; Kucukoglu	S."	Continuous versus separate isokinetic test protocol: The effect of estradiol on the reproducibility of concentric and eccentric isokinetic measurements in knee muscles	ARCHIVES OF PHYSICAL MEDICINE AND REHABILITATION	80	9	sep		1999
Gur1999a	H.; Akova	B.; P{\"{u}}nd{\"{u}}k	Z.; K{\"{u}}{\c{c}}{\"{u}}koÄŸlu	S."	Effects of age on the reciprocal peak torque ratios during knee muscle contractions in elite soccer players	SCANDINAVIAN JOURNAL OF MEDICINE & SCIENCE IN SPORTS	9	2	apr	81--87	1999																To investigate the effects of age on the reciprocal peak torque ratios during knee muscle contractions, 25 elite male soccer players, aged 22.3 +/- 3.8 yr (18-28), volunteered for the present study. The players were grouped as adult (>21 years, n = 13) and young players (less than or equal to 21 years, n = 12). Maximal concentric (CON) and eccentric (ECC) isokinetic thigh muscle strength was meas…
Guyomar1999	Reliability of single-lead VDD atrial sensing and pacing during exercise.	Pacing and clinical electrophysiology : PACE	22	12	dec	1747--1752	1999																If atrial sensing ability of a single-lead VDD pacemaker is well accepted at rest, the detection quality by atrial floating electrodes remains less recognized during exercise. The aim of this study was to verify, during treadmill test and a continous telemetry, the atrial tracking performance using four different leads technologies. From November 1994 to July 1997, 21 patients (71.3 +/- 6.3 years…		Aged,Aged, 80 and over,Atrioventricular Node,Cardiac Pacing, Artificial,Electrocardiography,Equipment Design,Equipment Failure,Exercise,Exercise Test,Female,Heart Block,Heart Rate,Humans,Male,Middle Aged,Pacemaker, Artificial,Reproducibility of Results,Rest,Telemetry,Time Factors,methods,physiology,physiopathology,therapy
Kaminski1999	Eversion strength analysis of uninjured and functionally unstable ankles	JOURNAL OF ATHLETIC TRAINING	34	3		239--245	1999																Objective: Functional ankle instability (FAI) afflicts many athletes. Several causes of FAI have been implicated, including peroneal muscle weakness. Traditional musculoskeletal rehabilitation programs have focused on concentric muscle strength. The purpose of our study was to compare concentric and eccentric isokinetic and isometric eversion ankle strength measurements between subjects identifie…
Kankaanpaa1999	M.; Taimela	S.; Airaksinen	O.; H{\"{a}}nninen	O."	The efficacy of active rehabilitation in chronic low back pain - Effect on pain intensity, self-experienced disability, and lumbar fatigability	SPINE	24	10	may	1034--1042	1999																Study Design. A randomized study comparing the results of active rehabilitation and passive control treatment in patients with chronic low back pain with follow-up at 6 months and 1 year. Objectives. To study the efficacy of active rehabilitation on pain, self-experienced disability, and lumbar fatigability. Summary of Background Data. Exercises in an outpatient setting are widely used for the tr…
Kellis1999	The effects of fatigue on the resultant joint moment, agonist and antagonist electromyographic activity at different angles during dynamic knee extension efforts	JOURNAL OF ELECTROMYOGRAPHY AND KINESIOLOGY	9	3		191--199	1999																Examination of the effects of fatigue on antagonist function can provide information on the role of antagonists in limiting the resultant joint moment and stabilizing the knee. Therefore, the purpose of this study was to examine the moment, agonist and antagonist electromyographic (EMG) activity levels at different angular positions during an isokinetic muscular endurance knee extension test. Fif…
Kellis1999a	Reliability of isokinetic concentric and eccentric strength in circumpubertal soccer players	PEDIATRIC EXERCISE SCIENCE	11	3		218--228	1999																The reliable examination of isokinetic parameters in young athletes is important for the establishment of appropriate strength testing protocols. The purpose of this study was to examine the reliability of peak moments, non-preferred/preferred leg and reciprocal ratios during isokinetic knee efforts in young soccer players. Thirteen circumpubertal (age = 13.0 +/- 0.4 years) soccer players perform…
Kellis1999b	Co-activation of vastus lateralis and biceps femoris muscles in pubertal children and adults	EUROPEAN JOURNAL OF APPLIED PHYSIOLOGY	79	6		504--511	1999																Determining the mechanisms of co-activation around the knee joint with respect to age and sex is important in terms of our greater understanding of strength development. The purpose of this study was to examine the effects of age, sex and muscle action on moment of force and electromyographic (EMG) activity of the agonist and antagonist muscle groups during isokinetic eccentric and concentric kne…
LaStayo1999	Chronic eccentric exercise: improvements in muscle strength can occur with little demand for oxygen	AMERICAN JOURNAL OF PHYSIOLOGY-REGULATORY INTEGRATIVE AND COMPARATIVE PHYSIOLOGY	276	2		R611--R615	1999																Eccentric contractions, the lengthening of muscle while producing force, are a common part of our everyday movements. This study presents a challenge to the accepted notion that eccentric work causes obligatory muscle injury while demonstrating that an increase in muscle strength, via eccentric work, can occur with little demand for oxygen. Nine healthy subjects, ages 18-34, were randomly placed …
Lee1999	Acute testing of the rate-smoothed pacing algorithm for ventricular rate stabilization.	Pacing and clinical electrophysiology : PACE	22	4 Pt 1	apr	554--561	1999																We evaluated the capability of a new pacemaker-based rate-smoothing algorithm (RSA) to reduce the irregular ventricular response of AF. RSA prevents sudden decreases in rate using a modified physiological band and flywheel feature. Twelve patients (51 +/- 21 years) with hemodynamically tolerated AF of 4 months to 20 years duration were studied. Atrial and ventricular leads were connected to the e…		Adult,Aged,Aged, 80 and over,Algorithms,Atrial Fibrillation,Cardiac Pacing, Artificial,Cohort Studies,Electrocardiography,Equipment Design,Female,Heart Rate,Humans,Male,Middle Aged,Pacemaker, Artificial,Safety,Signal Processing, Computer-Assisted,Ventricular Function,methods,physiology,physiopathology,therapy
Lev1999	Distribution of serum creatine kinase activity in young healthy persons	CLINICA CHIMICA ACTA	279	1-2		107--115	1999																The normal distribution of serum creatine kinase (CK) was determined in 428 men (mean age = 21.5) and 540 women (mean age = 20.2). The bootstrap method was employed to obtain statistical parameters of CK reference range and correlations with physical activity habits, BMI, cigarette smoking and alcohol consumption. CK distribution was non-Gaussian and skewed toward the higher values; 18.9% of the …
Leveritt1999	Acute effects of high-intensity endurance exercise on subsequent resistance activity	JOURNAL OF STRENGTH AND CONDITIONING RESEARCH	13	1		47--51	1999																This study investigated the effect of high-intensity endurance on subsequent isoinertial and isokinetic resistance exercise. One woman and five men (mean +/- SD: age = 20.3 +/- 2.5 years; body mass = 75.1 +/- 10.2 kg; height = 177.8 +/- 10.3 cm) performed isoinertial and isokinetic resistance exercise under control conditions (no experimental intervention) and after an acute bout of high-intensit…
Leveritt1999a	Effects of carbohydrate restriction on strength performance	JOURNAL OF STRENGTH AND CONDITIONING RESEARCH	13	1		52--57	1999																This study investigated the effect of a carbohydrate restriction program on performance in a bout of isoinertial and isokinetic strength exercise. One female and five male subjects (mean +/- SD: age = 20.3 +/- 2.3 years; body mass = 74.6 +/- 11.5 kg; height 177.0 +/- 8.8 cm) performed isoinertial and isokinetic strength exercise under control conditions (no experimental intervention) and after a …
MacLean1999	Eccentric kinetic chain exercise as a conservative means of functionally rehabilitating chronic isolated insufficiency of the posterior cruciate ligament	CLINICAL JOURNAL OF SPORT MEDICINE	9	3		142--150	1999																Objective: To determine the efficacy of a home eccentric kinetic chain exercise program in improving isokinetic strength, knee function, and symtomatology in athletes with isolated posterior cruciate ligament (PCL) injury. Design: Experimental design. Setting: Allan McGavin Sports Medicine Centre, University of British Columbia, Vancouver, British Columbia, Canada. Participants: The study include…
Malm1999	B."	Effects of eccentric exercise on the immune system in men.	Journal of applied physiology (Bethesda, Md. : 1985)	86	2	feb	461--468	1999																The effects of eccentric exercise on changes in numbers of circulating leukocytes, cell activation, cell adhesion, and cellular memory function were investigated in 12 men, aged 22-35 yr. The immunologic effects of postexercise epidermal treatment with monochromatic, infrared light were also evaluated. Blood was drawn before and 6, 24, and 48 h after exercise for phenotyping and analysis of creat…		Adult,Anaerobiosis,Antigens, CD,Bicycling,Exercise,Humans,Immune System,Leukocyte Count,Leukocytes,Lymphocyte Count,Lymphocytes,Male,Monocytes,immunology,physiology
Ostrowski1999	Pro- and anti-inflammatory cytokine balance in strenuous exercise in humans	JOURNAL OF PHYSIOLOGY-LONDON	515	1		287--291	1999																1. The present study investigates to what extent and by which time course prolonged strenuous exercise influences the plasma concentration of pro-inflammatory and inflammation responsive cytokines as well as cytokine inhibitors and anti-inflammatory cytokines. 2. Ten male subjects (median age 27.5 years, range 24-37) completed the? Copenhagen Marathon 1997 (median running time 3:26 (h:min), range…
Park1999	Vision rehabilitation for age-related macular degeneration.	International ophthalmology clinics	39	4		143--162	1999																Though the numbers of patients with ARMD are high, associated referrals for vision rehabilitation are not. Practitioners need to refer patients with age-related maculopathy when medical and surgical treatment are no longer possible, and patients need to be educated to that fact. The impact of improving activities of daily living may be monumental and benefits society as a whole. People who are vi…		Eyeglasses,Humans,Macular Degeneration,Patient Education as Topic,Prescriptions,Quality of Life,Refraction, Ocular,Visual Acuity,Visual Fields,rehabilitation
Pedersen1999	Exercise and immune function: effect of ageing and nutrition.	The Proceedings of the Nutrition Society	58	3	aug	733--742	1999																Strenuous exercise is followed by lymphopenia, neutrophilia, impaired natural immunity, decreased lymphocyte proliferative responses to mitogens, a low level of secretory immunoglobulin A in saliva, but high circulating levels of pro- and anti-inflammatory cytokines. These exercise-induced immune changes may provide the physiological basis of altered resistance to infections. The mechanisms under…		Aging,Diet,Exercise,Humans,Immunity,Nutritional Physiological Phenomena,Physical Endurance,physiology
Prabhakar1999	Non-compressive myelopathy: clinical and radiological study.	Neurology India	47	4	dec	294--299	1999																Fifty seven patients (42 males and 15 females) with non-compressive myelopathy were studied from 1997 to 1999. Acute transverse myelitis (ATM) was the commonest (31) followed by Vit B12 deficiency myelopathy (8), primary progressive multiple sclerosis (5), hereditary spastic paraplegia (3), tropical spastic paraplegia (2), subacute necrotising myelitis (1), radiation myelitis (1), syphilitic myel…		Adolescent,Adult,Aged,Aged, 80 and over,Female,Herpes Zoster,Humans,Male,Middle Aged,Multiple Sclerosis,Myelitis, Transverse,Neurosyphilis,Paraplegia,Radiography,Vitamin B 12 Deficiency,diagnostic imaging
Raty1999	H. P.; Kujala	U.; Videman	T.; Koskinen	S. K.; Karppi	S. L.; Sarna	S."	Associations of isometric and isoinertial trunk muscle strength measurements and lumbar paraspinal muscle cross-sectional areas.	Journal of spinal disorders	12	3	jun		1999
Roth1999	Ultrastructural muscle damage in young vs. older men after high-volume, heavy-resistance strength training	JOURNAL OF APPLIED PHYSIOLOGY	86	6		1833--1840	1999																This study assessed ultrastructural muscle damage in young (20-30 yr old) vs. older (65-75 yr old) men after heavy-resistance strength training (HRST). Seven young and eight older subjects completed 9 wk of unilateral leg extension HRST. Five sets of 5-20 repetitions were performed 3 days/wk with variable resistance designed to subject the muscle to near-maximal loads during every repetition. Bio…
Sayers1999	Adverse events associated with eccentric exercise protocols: six case studies.	Medicine and science in sports and exercise	31	12	dec	1697--1702	1999																PURPOSE: Rhabdomyolysis is a condition characterized by muscle damage and degeneration of muscle cells after strenuous, overexertion exercise. Although the incidence of severe rhabdomyolysis is rare, this condition can be dangerous and even fatal. Eccentric exercise protocols are currently being used to induce and study mild forms of muscle damage. However, serious adverse events can occur in the…		Arm,Creatine Kinase,Exercise,Humans,Male,Middle Aged,Myoglobinuria,Rhabdomyolysis,blood,etiology
Schell1999	Postexercise glucose, insulin, and C-peptide responses to carbohydrate supplementation: Running vs. resistance exercise	JOURNAL OF STRENGTH AND CONDITIONING RESEARCH	13	4		372--380	1999																This study was designed to compare the glucose, insulin, and C-peptide response of 8 men (mean age, 24 +/- 1 year) following 40 minutes of nonactivity (NA) a treadmill run (TR) at 75% (V) over dot O(2)max or resistance exercise (RE) (3 sets x 10 repetitions at 6 stations) at 75% of the one repetition maximum. The subjects were catheterized in an antecubital vein before each trial and 3-ml serum s…
Semark1999	The effect of a prophylactic dose of flurbiprofen on muscle soreness and sprinting performance in trained subjects	JOURNAL OF SPORTS SCIENCES	17	3		197--203	1999																The aim of this study was to examine the effects of a prophylactic dose of a local, transcutaneously administered, non-steroidal anti-inflammatory drug on muscle soreness, muscle damage and sprinting performance in young trained males. Twenty-five subjects aged 19 +/- 3 years, actively participating in rugby union and field hockey, were familiarized with the test procedure and then divided at ran…
Smith1999	Task-oriented" exercise improves hamstring strength and spastic reflexes in chronic stroke patients."	Stroke	30	10	oct	2112--2118	1999																BACKGROUND AND PURPOSE: Despite the belief that after cerebral infarction only limited functional gains are possible beyond the subacute period, we tested the hypothesis that a 12-week program of task-oriented" treadmill exercise would increase muscle strength and decrease spastic reflexes in chronic hemiparetic patients. METHODS: Fourteen subjects	aged 66+/-3 (mean+/-SEM) years	with residual gait deviations due to remote stroke (>6 months)	underwent repeated measures of reflexive and volitional (concentric and eccentric) torque with use of isokinetic dynamometry on the hamstring musculature bilaterally. Torque output was measured at 4 angular velocities (30(o)	60(o)
Staples1999	Effects of hyperbaric oxygen on a human model of injury	AMERICAN JOURNAL OF SPORTS MEDICINE	27	5		600--605	1999																To determine whether intermittent exposures to hyperbaric oxygen enhance recovery from delayed-onset muscle soreness of the quadriceps, we conducted a randomized, controlled, double-blinded, prospective study using 66 untrained men between the ages of 18 and 35 years. After the induction of muscle soreness, these subjects were treated in a hyperbaric chamber over a 5-day period in two phases, wit…
Svantesson1999	Development of fatigue during repeated eccentric-concentric muscle contractions of planter flexors in patients with stroke	ARCHIVES OF PHYSICAL MEDICINE AND REHABILITATION	80	10		1247--1252	1999																Objective: To better understand the mechanisms behind fatigue in muscles affected by a neuromuscular disease. Design: Patients recruited by convenience compared to age-matched healthy subjects from a population study. Setting: University hospital laboratory. Methods: Repetitive eccentric-concentric plantar flexions at 60 degrees/sec were performed on a dynamometer until exhaustion. The mean power…
Taivassalo1999	Gene shifting: a novel therapy for mitochondrial myopathy.	Human molecular genetics	8	6	jun	1047--1052	1999																Mutations in mitochondrial DNA (mtDNA) are the most frequent causes of mitochondrial myopathy in adults. In the majority of cases mutant and wild-type mtDNAs coexist, a condition referred to as mtDNA heteroplasmy; however, the relative frequency of each species varies widely in different cells and tissues. Nearly complete segregation of mutant and wild-type mtDNAs has been observed in the skeleta…		Creatine Kinase,DNA, Mitochondrial,Exercise Therapy,Gene Expression Regulation,Genotype,Humans,Male,Middle Aged,Mitochondrial Myopathies,Muscle Contraction,Muscle, Skeletal,Mutation,Phenotype,RNA, Transfer, Leu,enzymology,genetics,metabolism,pathology,therapy
Tamulevicius1999	Low-frequency fatigue in eccentric exercises of adult and elderly men's skeletal muscle	JOURNAL OF AGING AND PHYSICAL ACTIVITY	7	3		261--262	1999
Thompson1999	Cardiovascular responses to submaximal concentric and eccentric isokinetic exercise in older adults	JOURNAL OF AGING AND PHYSICAL ACTIVITY	7	1		20--31	1999																Our purpose was to describe heart rate (HR), mean arterial blood pressure (MAP), and perceived exertion (RPE) responses to submaximal isokinetic concentric (CON) and eccentric (ECC) exercise at the same absolute torque output in older adults. Peak torques for ECC and CON knee extension were determined in healthy older males (n = 13) and females (n = 7). Subjects then performed separate, randomly …
Tollback1999	A.; Eriksson	S.; Wredenberg	A.; Jenner	G.; Vargas	R.; Borg	K.; Ansved	T."	Effects of high resistance training in patients with myotonic dystrophy.	Scandinavian journal of rehabilitation medicine	31	1		9--16	1999
Abboud2000	Lower limb muscle dysfunction may contribute to foot ulceration in diabetic patients.	Clinical biomechanics (Bristol, Avon)	15	1	jan	37--45	2000																OBJECTIVES: To investigate the relationship between in-shoe plantar foot pressure and the co-ordinated activity of five lower limb muscles of diabetic patients, who are known to have a higher risk of foot morbidity. DESIGN: A portable six channel electromyographic system has been designed, developed and synchronised in real time with a 16 channel piezoelectric transducer in-shoe pressure measurin…		Adult,Biomechanical Phenomena,Case-Control Studies,Diabetic Foot,Electromyography,Female,Foot Ulcer,Humans,Male,Middle Aged,Monitoring, Ambulatory,Muscle Contraction,Muscle, Skeletal,Pressure,Statistics, Nonparametric,Transducers,Walking,etiology,instrumentation,physiology,physiopathology
Alfredson2000	Chronic Achilles tendinosis: recommendations for treatment and prevention.	Sports medicine (Auckland, N.Z.)	29	2	feb	135--146	2000																Chronic Achilles tendinosis is a condition with an unknown aetiology and pathogenesis that is often, but not always, associated with pain during loading of the Achilles tendon. Histologically, there are no inflammatory cells, but increased amounts of interfibrillar glycosaminoglycans and changes in the collagen fibre structure and arrangement are seen. In situ microdialysis has confirmed the abse…		Achilles Tendon,Biomechanical Phenomena,Chronic Disease,Humans,Running,Sports,Tendinopathy,etiology,physiopathology,surgery,therapy
Arnett2000	Age-related variations of serum CK and CK MB response in females.	Canadian journal of applied physiology = Revue canadienne de physiologie appliquee	25	6	dec	419--429	2000																The objective was to determine whether serum creatine kinase (CK) and serum CK MB activity following exercise-induced muscle damage activity differs among females of varying menarchial status and to determine whether there is a relationship between serum estradiol (E2) concentration, CK, and CK MB activity. Fifteen menarchial (M), 15 premenarchial (P), and 10 postmenopausal (PM) females participa…		Adult,Aging,Analysis of Variance,Body Composition,Body Mass Index,Child,Creatine Kinase,Creatine Kinase, MB Form,Estradiol,Female,Follow-Up Studies,Humans,Isoenzymes,Menarche,Middle Aged,Muscle Contraction,Muscle, Skeletal,Physical Exertion,Postmenopause,Sexual Maturation,blood,enzymology,physiology
Bellew2000	Concentric versus eccentric strength of the quadriceps femoris in elderly and young women	JOURNAL OF STRENGTH AND CONDITIONING RESEARCH	14	4		419--425	2000																Decreased isometric and concentric strength in the aging has been associated with muscle atrophy, deterioration of mechanical properties, and motor unit loss. However, recent evidence suggests a preservation of eccentric strength. The purpose of this study, therefore, was to examine isokinetic concentric and eccentric quadriceps strength between elderly and young women. Nine younger (24.1 +/- 1.6…
Bisciotti2000	Analysis of musculo-tendinous unity elastic characteristics and equilibrium capacity of two different athletic groups.	MEDICINA DELLO SPORT	53	2		125--135	2000																The elastic characteristics of the musculo-tendinous unity constitute an important maker in the field of the performance control. The elastic characteristics of the muscle could be referred to as a global type" elasticity or to a specific elasticity of the Serial Elastic Component (SEC). In fact in a movement which produces a stretching-shortening phase the mechanism of storage and release of ela…	weight and height were respectively 20.2+/-2.4 (average +/- SD) years	70.1+/-6.2 kg and 183.7+/-4.2 cm	the second group was composed of 7 sprinters of national level as well (SG) whose age	weight and height were respectively 21.8+/-2.5 years
Carluccio2000	Prognostic value of left ventricular hypertrophy and geometry in patients with a first, uncomplicated myocardial infarction.	International journal of cardiology	74	2-3	jul	177--183	2000																BACKGROUND: The prognostic impact of left ventricular (LV) geometry on cardiovascular risk for patients with a first, uncomplicated acute myocardial infarction (AMI), and echocardiographic ejection fraction > or =50% has not been well described. METHODS AND RESULTS: Accordingly, 111 AMI consecutive patients (mean age 59.3+/-10 years) performed echocardiographic examination at predischarge. LV mas…		Aged,Analysis of Variance,Cardiac Catheterization,Echocardiography, Doppler,Exercise Test,Female,Follow-Up Studies,Humans,Hypertrophy, Left Ventricular,Male,Middle Aged,Myocardial Infarction,Probability,Prognosis,Proportional Hazards Models,Sensitivity and Specificity,Statistics, Nonparametric,Stroke Volume,complications,diagnosis,diagnostic imaging,etiology,therapy
Carter2000	Oxygen uptake kinetics in treadmill running and cycle ergometry: a comparison	JOURNAL OF APPLIED PHYSIOLOGY	89	3		899--907	2000																The purpose of the present study was to comprehensively examine oxygen consumption ((V)over dot O-2,) kinetics during running and cycling through mathematical modeling of the breath-by-breath gas exchange responses to moderate and heavy exercise. After determination of the lactate threshold (LT) and maximal oxygen consumption ((V)over dotO(2max)) in both cycling and running exercise, seven subjec…	50	and 75%Delta (Delta being the difference between LT and ire
Connelly2000	Motor skill learning of concentric and eccentric isokinetic movements in older adults.	Experimental aging research	26	3		209--228	2000																Neuromuscular adaptation at the onset of resisted exercise can be observed as increases in torque and surface electromyography. The effect of learning the motor task has been hypothesized to contribute to these early increases, especially for older people. Thus, the purpose of this study was to investigate the facilitatory effects of practice on motor performance in older adults during short-term…		Aged,Aged, 80 and over,Aging,Female,Humans,Learning,Male,Motor Skills,Muscle Contraction,physiology
Connelly2000a	Effects of isokinetic strength training on concentric and eccentric torque development in the ankle dorsiflexors of older adults.	The journals of gerontology. Series A, Biological sciences and medical sciences	55	10	oct	B465--72	2000																This study quantifies concentric and eccentric dorsiflexor muscle torque at various movement velocities and determines the neuromuscular effects from short-term practice of repeated maximal voluntary contractions using an isokinetic resisted exercise program in older adults. Twenty-eight subjects (76.3+/-4.6 years) trained concentric and eccentric dorsiflexion 3 days per week for 2 weeks at 30 de…		Aged,Aged, 80 and over,Ankle,Electromyography,Female,Humans,Leg,Male,Muscle Contraction,Muscle, Skeletal,Physical Education and Training,Torque,physiology
DelAguila2000	Muscle damage impairs insulin stimulation of IRS-1, PI 3-kinase, and Akt-kinase in human skeletal muscle	AMERICAN JOURNAL OF PHYSIOLOGY-ENDOCRINOLOGY AND METABOLISM	279	1		E206--E212	2000																Physiological stress associated with muscle damage results in systemic insulin resistance. However, the mechanisms responsible for the insulin resistance are not known; therefore, the present study was conducted to elucidate the molecular mechanisms associated with insulin resistance after muscle damage. Muscle biopsies were obtained before (base) and at 1 h during a hyperinsulinemic-euglycemic c…
Dolezal2000	Muscle damage and vesting metabolic rate after acute resistance exercise with an eccentric overload	MEDICINE AND SCIENCE IN SPORTS AND EXERCISE	32	7		1202--1207	2000																Purpose: The purpose of this investigation was to determine whether muscle damage caused from acute resistance exercise with an eccentric overload would influence resting metabolic rate (RMR) up to 72 h postexercise in resistance-trained (RT) and untrained (UT) subjects. Methods: Nine RT and 9 UT male subjects (mean +/- SD; age = 20.7 +/- 2.1 yr; body mass = 79.0 +/- 1.4 kg; height = 178.3 +/- 3.…
Dolny2000	Comparison of power output generated on the Wingate cycle ergometer and on a new, closed-chain lower-extremity dynamometer	JOURNAL OF STRENGTH AND CONDITIONING RESEARCH	14	1		87--91	2000																Ten trained male subjects (age range, 24 +/- 3 years) performed the 30-second Wingate anaerobic cycle test (WIN) and a 30-second maximal effort test on the semirecumbent, lower-extremity Omnikinetic dynamometer (OmK). The OmK uses a bilateral, concentric, and eccentric stair-stepping motion. WIN resistance (N) was 0.90 x subject's body weight in kilograms, whereas OmK resistance (pounds) was set …
Dore2000	Testing peak cycling performance: effects of braking force during growth	MEDICINE AND SCIENCE IN SPORTS AND EXERCISE	32	2		493--498	2000																The purpose of this study was to investigate the relationship between cycling peak power (CPP; flywheel inertia included) and the applied braking force (F-B) on a friction-loaded cycle ergometer in male children, adolescents, and adults. A total of 520 male subjects aged 8-20 yr performed three brief maximal sprints against three F-B: 0.245, 0.491, and 0.736 N.kg(-1) body mass (BM) (corresponding…
Dore2000a	Testing peak cycling performance: effects of braking force during growth.	Medicine and science in sports and exercise	32	2	feb	493--498	2000																The purpose of this study was to investigate the relationship between cycling peak power (CPP; flywheel inertia included) and the applied braking force (F(B)) on a friction-loaded cycle ergometer in male children, adolescents, and adults. A total of 520 male subjects aged 8-20 yr performed three brief maximal sprints against three F(B): 0.245, 0.491, and 0.736 N x kg(-1) body mass (BM) (correspon…		Adolescent,Adult,Age Factors,Bicycling,Biomechanical Phenomena,Body Mass Index,Child,Exercise Test,Exercise Tolerance,Humans,Male,Weight-Bearing,physiology
Dore2000b	Dimensional changes cannot account for all differences in short-term cycling power during growth	INTERNATIONAL JOURNAL OF SPORTS MEDICINE	21	5	jul	360--365	2000																The purpose of this study was to determine to what extent anthropometric characteristics account for cycling peak power during growth. Five hundred and six male subjects aged 7.5-18 years performed three brief maximal sprints on a friction-loaded cycle ergometer. Cycling peak power (CPP) was calculated including the flywheel inertia of the device. Fat-free mass (FFM) and lean leg volume (LLV) wer…	using an allometric model	showed that a large part of the variance of CPP was explained by LLV (88.2 %	p < 0.001). However	age and time to reach peak power also contributed significantly (similar to 3%
Evans2000	Vitamin E, vitamin C, and exercise.	The American journal of clinical nutrition	72	2 Suppl	aug	647S--52S	2000																Exercise increases the generation of oxygen free radicals and lipid peroxidation. Strenuous exercise in a person who is unconditioned or unaccustomed to exercise will induce oxidative damage and result in muscle injury. However, aerobic exercise training strengthens the antioxidant defense system by increasing superoxide dismutase. Vitamin C and, especially, vitamin E are shown to decrease the ex…		Adult,Age Factors,Aged,Antioxidants,Ascorbic Acid,Creatine Kinase,Cytokines,Dietary Supplements,Exercise,Female,Humans,Male,Middle Aged,Muscle, Skeletal,Neutrophils,Oxygen Consumption,Reactive Oxygen Species,Vitamin E,biosynthesis,blood,chemistry,metabolism,physiology,standards
Gosselin2000	Attenuation of force deficit after lengthening contractions in soleus muscle from trained rats	Journal of Applied Physiology	88	4		1254--1258	2000	Dept. Phys. Ther., Exercise, N., Stt. Univ. of New York at Buffalo, Buffalo, NY 14214, United States		https://www.scopus.com/inward/record.uri?eid=2-s2.0-0034049511&doi=10.1152%2Fjappl.2000.88.4.1254&partnerID=40&md5=0539d7431bd6ab7eb501f2576ec0862e												Cited By :23 Export Date: 12 October 2021	The purposes of this study were 1) to determine the extent to which endurance training reduces the functional deficit induced by lengthening contractions in the soleus (Sol) muscle and 2) to determine whether young and old rats training at a comparable relative exercise intensity would demonstrate a similar protective effect from lengthening-contraction-induced injury. Young (3-mo-old) and old (2…		Aging,Eccentric contraction,Fischer 344 rat,Stretch
Hiemstra2000	Knee strength deficits after hamstring tendon and patellar tendon anterior cruciate ligament reconstruction	MEDICINE AND SCIENCE IN SPORTS AND EXERCISE	32	8		1472--1479	2000																Purpose: The purpose of this study was to examine the strength of the knee flexors and knee extensors after two surgical techniques of ACL reconstruction and compare them to an age and activity level matched control group. Methods: Twenty-four subjects who had undergone ACL reconstruction greater than 1 yr previously were placed into one of two groups according to autograft donor site: patellar t…
Hole2000	Dynamic control and conventional strength ratios of the quadriceps and hamstrings in subjects with anterior cruciate ligament deficiency	ERGONOMICS	43	4th International Conference on Sport	Leisure and Ergonomics		1603--1609	2000																The hamstrings:quadriceps muscle strength ratio has been used as an indicator of normal balance between the knee flexors and extensors. A more functional approach to this strength ratio would be to compare opposite muscle actions of antagonistic muscle groups. The dynamic strength control ratio (DSCR) should give a more appropriate measure relating to knee function. There is a lack of normative d…
Horstmann2000	New aspects in rehabilitation of osteoarthritic and endoprosthesis patients	MEDIZINISCHE WELT	51	6		193--197	2000																Deficits remaining after rehabilitation with respect to strength, strength endurance, gait patterns and electrical control in patients with arthritis and prosthesis of the hip ore described in derail. In brief, a training program of muscle strength, strength endurance and improvement of aerobic capacity appears meaningful. Training effects con be demonstrated up to two years after progressive reh…
Hortobagyi2000	Favorable neuromuscular and cardiovascular responses to 7 days of exercise with an eccentric overload in elderly women	JOURNALS OF GERONTOLOGY SERIES A-BIOLOGICAL SCIENCES AND MEDICAL SCIENCES	55	8	aug	B401--B410	2000																The metabolic, cardiovascular, and neural cost of eccentric muscle contraction is less than that of concentric contraction, but the strength and neural adaptations in eccentric contractions are significantly greater following resistive exercise. We thus compared the short-term effects of exercise with an eccentric overload (n = 10) with those of exercise with a standard load distribution (n = 10)…		,Age Factors,Aged,Cardiovascular Physiological Phenomena,Electromyography,Exercise,Female,Humans,Muscles,Nervous System Physiological Phenomena,Reproducibility of Results,Time Factors,Weight-Bearing,physiology
Kay2000	Different neuromuscular recruitment patterns during eccentric, concentric and isometric contractions	JOURNAL OF ELECTROMYOGRAPHY AND KINESIOLOGY	10	6		425--431	2000																Aim. The purpose of this study was to determine the neuromuscular fatigue profiles during 100 s isometric (ISO), concentric (CON), and eccentric (ECC) activity. Methods. Twelve subjects (age 25.1+/-3.7 years, mass 70.1+/-8.2 kg, mean+/-SD) performed ISO, CON and ECC maximal voluntary contractions and 100 s endurance trials on an isokinetic dynamometer. Raw EMG data were recorded throughout each t…
Kellis2000	Prediction of knee extensor and flexor isokinetic strength in young male soccer players	JOURNAL OF ORTHOPAEDIC & SPORTS PHYSICAL THERAPY	30	11		693--701	2000																Study Design: Single group, cross-sectional study. Objectives: To measure various anthropometric and demographic variables in young male soccer players and to use these measurements to develop equations with which to predict the isokinetic, concentric, and eccentric moment of force. Background: The development of equations that can predict isokinetic muscle strength from commonly measured subject…
Kinoshita2000	Physiological profile of middle-aged and older climbers who ascended Gasherbrum II, an 8035-m Himalayan peak.	The journals of gerontology. Series A, Biological sciences and medical sciences	55	11	nov	M630--3	2000																BACKGROUND: The purpose of this study was to investigate the physiological characteristics of a group of middle-aged and older Japanese climbers who ascended Gasherbrum II, an 8035-m peak in the Karakoram Range of the Himalayas. METHODS: Body composition, cardiac structure, and respiratory gas exchange during exercise were estimated in eight climbers with differing levels of experience (seven men…		Aged,Aging,Altitude,Female,Humans,Male,Oxygen Consumption,Respiration,Sports Medicine,Ventricular Function, Left,physiology
Krishnathasan2000	Eccentric strength training prescription for older adults	Topics in Geriatric Rehabilitation	15	3		29--40	2000	Schools Kinesiology and Phys. Ther., Faculty of Health Sciences, University of Western Ontario, London, Ont., Canada		https://www.scopus.com/inward/record.uri?eid=2-s2.0-0034012515&doi=10.1097%2F00013614-200003000-00006&partnerID=40&md5=5f202f4c4b61001a33a526ab2ad25211												Cited By :16 Export Date: 12 October 2021	This article describes changes in muscle fiber size and type, motor unit remodeling, altered recruitment patterns, and a sedentary lifestyle, which are often causes of muscle weakness in many aging adults. While some age- related losses of function appear unavoidable, it is also apparent that older persons can capitalize on their relatively higher eccentric strength reserve and use it advantageou…		Aging,Eccentric,Exercise,Muscle strength,Sarcopenia,Training
Lan2000	Tai Chi Chuan to improve muscular strength and endurance in elderly individuals: a pilot study.	Archives of physical medicine and rehabilitation	81	5	may	604--607	2000																OBJECTIVE: To evaluate the training effect of a Tai Chi Chuan (TCC) program on knee extensor muscular strength and endurance in elderly individuals. DESIGN: Before-after trial. SETTING: Community setting. PARTICIPANTS: Forty-one community dwelling subjects aged 61.1 +/- 9.8 years undertook a TCC program. Nine dropped out during the study. Pretraining and posttraining measurements were obtained fr…		Aged,Female,Humans,Isometric Contraction,Knee,Male,Martial Arts,Middle Aged,Physical Endurance,Pilot Projects,Treatment Outcome,physiology
McBride2000	Increased depolarization, prolonged recovery and reduced adaptation of the resting membrane potential in aged rat skeletal muscles following eccentric contractions	MECHANISMS OF AGEING AND DEVELOPMENT	115	3		127--138	2000																Previously it was shown in young-adult muscles that eccentric contractions (EC) produce a significant (24 h) depolarization of the resting membrane potential (RMP), and that in-vitro (Gd3+) and in-vivo (streptomycin) blockade of stretch activated ion channels (SAC) result in a partial repolarization of the RMP. The portion of the depolarization not restored by SAC blockade is believed to be from …
Mikesky2000	Relationship between quadriceps strength and rate of loading during gait in women	JOURNAL OF ORTHOPAEDIC RESEARCH	18	2		171--175	2000																One function of skeletal muscle is to serve as the body's shock absorbers and thus dampen rates of loading during activity. The aim of this cross-sectional study was to determine the significance of muscle strength on rates of loading during gait. Thirty-seven women (mean age: 34.5 +/- 8.2 years) were solicited by advertisement and placed into one of two groups-strength-trained or sedentary-on th…
Moller2000	The test-retest reliability of concentric and eccentric muscle action during plantar flexion of the ankle joint in a closed kinetic chain	ISOKINETICS AND EXERCISE SCIENCE	8	4		223--227	2000																Maximum concentric and eccentric isokinetic plantar flexion peak torque values were evaluated in a closed kinetic chain in eight volunteers from a high-level junior soccer team, with a median age of 17 (range 16-18) years. An isokinetic dynamometer was used and the reproducibility of a previously unevaluated position of the subject was assessed. The test-retest interval was 48 hours. The reproduc…
Montain2000	Impact of muscle injury and accompanying inflammatory response on thermoregulation during exercise in the heat.	Journal of applied physiology (Bethesda, Md. : 1985)	89	3	sep	1123--1130	2000																This study examined whether muscle injury and the accompanying inflammatory responses alter thermoregulation during subsequent exercise-heat stress. Sixteen subjects performed 50 min of treadmill exercise (45-50% maximal O(2) consumption) in a hot room (40 degrees C, 20% relative humidity) before and at select times after eccentric upper body (UBE) and/or eccentric lower body (LBE) exercise. In e…		Acclimatization,Adolescent,Adult,Aged,Aged, 80 and over,Body Temperature,Body Temperature Regulation,Creatine Kinase,Exercise,Female,Hot Temperature,Humans,Interleukin-6,Male,Middle Aged,Muscle, Skeletal,Myositis,Pain,Stress, Physiological,Sweating,Wounds and Injuries,blood,complications,etiology,injuries,metabolism,physiology,physiopathology
Mouraux2000	The effect of submaximal eccentric isokinetic training on strength and cross sectional area of the human achilles tendon	ISOKINETICS AND EXERCISE SCIENCE	8	3		161--167	2000																This study was designed to investigate the effects of six weeks submaximal eccentric training on concentric and eccentric isokinetic peak torque and cross sectional area (CSA) (muscle and tendon) of calf muscle. Six men and four women volunteered as subjects for this study. Peak torque values for plantar flexion were determined at 30 degrees /a, 60 degrees /s and 90 degrees /s (concentric and ecc…
Okamoto2000	Relationship between the intensity of muscle contraction and muscle oxygenation of the M. rectus femoris during dynamic knee extension	JAPANESE JOURNAL OF PHYSICAL FITNESS AND SPORTS MEDICINE	49	1		203--210	2000																This study investigated the relationship between the intensity of muscle contraction and muscle oxygenation during dynamic knee extension. Six healthy male subjects (age 24.6+/-1.2 years) per formed knee extension (concentric: 1 s/eccentric: 1s) to exhaustion at 3 different intensities, 30%, 20% and 10% of maximum voluntary contractile strength (MVC). A near-infrared spectroscopy (NIRS) probe and…
Overend2000	Cardiovascular stress associated with concentric and eccentric isokinetic exercise in young and older adults.	The journals of gerontology. Series A, Biological sciences and medical sciences	55	4	apr	B177--82	2000																Heart rate (HR), mean arterial blood pressure (MAP), and rate-pressure product (RPP) responses to submaximal isokinetic concentric (CON) and eccentric (ECC) knee extension exercise were compared at the same absolute torque output in 20 young (mean+/-SD=23.2+/-1.7 years) and 20 older (mean+/-SD=75.2+/-4.6 years) adults. After determination of peak CON and ECC torques, subjects performed separate, …		Adult,Aged,Blood Pressure,Exercise,Female,Heart Rate,Humans,Male,Muscle Contraction,Myocardium,Oxygen Consumption,metabolism
Pedersen2000	Cytokines in aging and exercise	INTERNATIONAL JOURNAL OF SPORTS MEDICINE	21	4th Symposium of the International-Society-of-Exercise-and-Immunology		S4--S9	2000																Aging is associated with increased inflammatory activity. Increased plasma levels of tumour necrosis factor (TNF)-alpha were found in centenarians aged 100 years and in individuals aged 80-81 years when compared to a young control group. Plasma levels of TNF-a were linearly correlated to plasma levels of interleukin (IL)-6, TNF-receptors and C-reactive protein. High levels of TNF-a were directly …
Pincivero2000	Quadriceps-hamstring EMG activity during functional, closed kinetic chain exercise to fatigue	EUROPEAN JOURNAL OF APPLIED PHYSIOLOGY	81	6		504--509	2000																It has been hypothesized that the ability of the neuromuscular system to co-contract muscles for joint stabilization may be impaired during the development of fatigue. The purpose of this study was to examine muscle activation of the quadriceps and hamstring muscles during a prolonged closed kinetic chain exercise, the forward lunge. Eight males and two females [mean (SD) age 26.0 (2.3) years, he…
Porter2000	Resistance training recommendations for older adults	TOPICS IN GERIATRIC REHABILITATION	15	3		60--69	2000																Resistance training is now recognized as an important component of regularly attained physical activity, particularly for older adults. As such, specific recommendations have been made for optimal benefits. Training should ultimately include 8 to 10 exercises for the major muscle groups and he performed at a moderate to high intensity level fur at least one of the sets, 2 to 3 days per week. Stre…
Poulis2000	Torque characteristics of the ankle plantarflexors and dorsiflexors during eccentric and concentric contraction in healthy young males	ISOKINETICS AND EXERCISE SCIENCE	8	4		195--202	2000																The torque characteristics were determined for the ankle dorsiflexors and plantarflexors during concentric and eccentric contractions, at 45 degrees /s with the knee flexed 90 degrees, in 37 young healthy males aged 21 to 24 years. Mean maximum torque during concentric and eccentric contraction was 32.8 +/- 5.5 Nm and 57.8 +/- 14.3 Nm (ratio 0.57) for the dorsiflexors, and 86.3 +/- 26.8 Nm and 86…
Roth2000	High-volume, heavy-resistance strength training and muscle damage in young and older women	JOURNAL OF APPLIED PHYSIOLOGY	88	3		1112--1118	2000																To determine possible age differences in muscle damage response to strength training, ultrastructural muscle damage was assessed in seven 20- to 30-yr-old and six 65- to 75-yr-old previously sedentary women after heavy-resistance strength training (HRST). Subjects performed unilateral knee-extension exercise 3 days/wk for 9 wk. Bilateral muscle biopsies from the vastus lateralis were assessed for…
Rusanenko2000	High-strength titanium-free maraging steel for large machine parts	PHYSICS OF METALS AND METALLOGRAPHY	90	4		411--417	2000																A relationship between the changes in the structure and mechanical properties of titanium-free Fe15% Ni-Co-Mo-V-based maraging steels was established. The strengthening of these maraging steels upon martensite aging was shown to be caused by the precipitation of intermetallics of Ni3V and Fe2Mo types. The titanium-free iron-nickel-vanadium maraging steels are remarkable for their combination of h…
Sacheck2000	The effect of diet on vitamin E intake and oxidative stress in response to acute exercise in female athletes	EUROPEAN JOURNAL OF APPLIED PHYSIOLOGY	83	1		40--46	2000																Vitamin E is the major lipid-soluble antioxidant found in foods, and its bioavailability is affected by the presence of dietary fats. Athletes often consume lowfat diets and may be more susceptible to the oxidative stress produced by exercise due to the low availability of vitamin E, In this study, the effects of a low-fat diet on vitamin E intake and oxidative stress markers were assessed in col…
Sam2000	Desmin knockout muscles generate lower stress and are less vulnerable to injury compared with wild-type muscles	AMERICAN JOURNAL OF PHYSIOLOGY-CELL PHYSIOLOGY	279	4		C1116--C1122	2000																The functional role of the skeletal muscle intermediate filament system was investigated by measuring the magnitude of muscle force loss after cyclic eccentric contraction (EC) in normal and desmin null mouse extensor digitorum longus muscles. Isometric stress generated was significantly greater in wildtype (313 +/- 8 kPa) compared with knockout muscles (276 +/- 13 kPa) before EC (P< 0.05), but 1…
Schwane2000	Plasma creatine kinase responses of 18- to 30-yr-old African-American men to eccentric exercise.	Medicine and science in sports and exercise	32	2	feb	370--378	2000																PURPOSE: The primary aim was to describe the response of plasma creatine kinase (CK) activity in a sample of African-American men after a bout of eccentric exercise. The study also described signal intensity changes detected by MR in the musculature of the right lower leg. METHODS: Subjects were 20 male volunteers of African descent (age = 24 +/- 4 [mean +/- SD] yr). Each walked backward for 60 m…	the plasma CK response was similar to responses of comparison Caucasian subjects. All subjects reported delayed muscle soreness; there was no association between soreness and plasma CK. Every subject showed MRI evidence of injury to plantar flexor muscles postexercise but varying in degree and time course. Plasma CK activity correlated to MRI signal intensity (rho = 0.445). CONCLUSION: Results su…		Adolescent,Adult,African Continental Ancestry Group,Creatine Kinase,European Continental Ancestry Group,Exercise,Exercise Tolerance,Humans,Magnetic Resonance Imaging,Male,Muscle, Skeletal,metabolism,pathology,physiology
Seger2000	Muscle strength and electromyogram in boys and girls followed through puberty.	European journal of applied physiology	81	1-2	jan	54--61	2000																The main purpose of this study was to investigate the changes in anthropometric measures and muscle strength that occur during puberty in children from the age of 11 to 16 years. Special attention was paid to possible gender- and muscle action-type-specific alterations in torque/velocity and EMG/velocity characteristics. Sixteen children participated in the study (9 boys and 7 girls). Eccentric a…		Adolescent,Aging,Anthropometry,Child,Electromyography,Female,Humans,Male,Muscle, Skeletal,Puberty,Time Factors,Torque,physiology
Skurvydas2000	Changes in height of jump, maximal voluntary contraction force and low-frequency fatigue after 100 intermittent or continuous jumps with maximal intensity	ACTA PHYSIOLOGICA SCANDINAVICA	169	1		55--62	2000																Healthy untrained males (age 25.4 +/- 1.7 years, n = 12) gave their informed consent to take part in all experiments within the study. After 100 intermittent (every 20 s) drop jumps from the height of 0.4 m, jumps with counter-movement to 90 degrees angle in the knee and immediate maximal rebound (eccentric-concentric exercise; E-C) and 100 continuous jumps (five bouts of 20 jumps with counter-mo…
Smith2000	Cytokines and cell adhesion molecules associated with high-intensity eccentric exercise	EUROPEAN JOURNAL OF APPLIED PHYSIOLOGY	82	1-2		61--67	2000																Unaccustomed, eccentrically biased exercise induces trauma to muscle and/or connective tissue. Tissue damage activates an acute inflammatory response. Inflammation requires the effective interaction of different physiological and biological systems. Much of this is coordinated by the de novo synthesis of families of protein molecules, cytokines. The purpose of the present paper was to determine c…
Soderman2000	Bone mass and muscle strength in young female soccer players	CALCIFIED TISSUE INTERNATIONAL	67	4		297--303	2000																In this cross-sectional study, bone mass and muscle strength of the thigh were investigated in 51 female soccer players, age 16.3 +/- 0.3 years, who had been playing soccer for 8.1 +/- 2.1 years and were at the time of the study in soccer training for 5.0 +/- 1.7 hours/week. They were compared with 41 nonactive females, age 16.2 +/- 1.3 years. The groups were matched according to age, weight, and…
Spina2000	Adaptations in beta-adrenergic cardiovascular responses to training in older women.	Journal of applied physiology (Bethesda, Md. : 1985)	89	6	dec	2300--2305	2000																To determine whether endurance exercise training can alter the beta-adrenergic-stimulated inotropic response in older women, we studied 10 postmenopausal healthy women (65.4 +/- 0.9 yr old) who exercised for 11 mo. Left ventricular (LV) function was evaluated with two-dimensional echocardiography during infusion of isoproterenol after atropine. Maximal O(2) consumption increased 23% in response t…		Adaptation, Physiological,Adrenergic beta-Agonists,Aged,Aging,Atropine,Blood Pressure,Cardiovascular Physiological Phenomena,Echocardiography,Female,Heart,Heart Rate,Humans,Isoproterenol,Middle Aged,Muscarinic Antagonists,Myocardial Contraction,Oxygen Consumption,Physical Education and Training,Physical Endurance,Receptors, Adrenergic, beta,Ventricular Function, Left,drug effects,pharmacology,phy…
Tis2000	Effects of magnets on concentric and eccentric isokinetic force production of the quadriceps group	ISOKINETICS AND EXERCISE SCIENCE	8	4		217--221	2000																The purpose of this study was to determine the effects of magnets on concentric and eccentric isokinetic peak and average force production of the dominant knee extensor musculature. All subjects were randomly assessed via isokinetic dynamometry (KinCom 500H, Chattecx Corp.) for concentric and eccentric peak and average force production of the quadriceps in the conditions of magnet, placebo magnet…
Wang2000	Advances in application and future prospects for superconducting bulk materials	RARE METAL MATERIALS AND ENGINEERING	29	5		293--297	2000																Progresses and directions of HTS applications world wide are reviewed in this paper, especially with respects to:transmission cables, transformers, fault current limiters(FCL), current leads, motors, flywheel power storage systems, magnetic resonance imagine (MRI), and magnetic levitation trains (Maglev). Prepared and developed in our country are materials for power cables, current leads, FCL, MR…
Weiss2000	Gross measures of exercise-induced muscular hypertrophy	JOURNAL OF ORTHOPAEDIC & SPORTS PHYSICAL THERAPY	30	3		143--148	2000																Study Design: Pretest-posttest, single factor design. Objectives: To compare several indices that might be used to depict muscle size. Background: The particular strategy used during heavy-resistance training may determine the magnitude of hypertrophic adaptations. At the same time, assorted measures supposedly reflecting muscle size may provide different results. Methods and Measures: Four group…
Willett2000	Response to stimulation-evoked eccentric muscle contractions in hypertensive rats	MEDICINE AND SCIENCE IN SPORTS AND EXERCISE	32	8		1390--1398	2000																Purpose: The purpose of this study was to determine whether the functional deficits observed in the skeletal muscles of adult, spontaneously hypertensive rats (SHR) arise because of an inability of injured muscles to regenerate normally in the hypertensive environment, Methods: Force decline and recovery were evaluated in SHR tibialis anterior (TA) at various times after a series of 192 eccentric…
Yoon2000	Comparison of eccentric and concentric isokinetic exercise testing after anterior cruciate ligament reconstruction	YONSEI MEDICAL JOURNAL	41	5		584--592	2000																Evaluation of muscle function can be helpful in rehabilitation programs with knee injuries. The purposes of this study were to evaluate muscle performance and functional level through eccentric and concentric isokinetic testing after anterior cruciate ligament reconstruction, and to determine whether eccentric and concentric isokinetic values were correlated with functional level using the Modifi…
Baldwin2001	Nonsteroidal anti-inflammatory therapy after eccentric exercise in healthy older individuals.	The journals of gerontology. Series A, Biological sciences and medical sciences	56	8	aug	M510--3	2001																BACKGROUND: Aging is associated with greater susceptibility to muscle injury and soreness after exercise. Although elderly persons regularly consume nonsteroidal anti-inflammatory drugs (NSAIDs), it is not clear that NSAIDs alleviate muscle dysfunction and/or inflammation following injurious exercise. METHODS: In this double-blind crossover study, 10 men and 5 women (aged 60 +/- 2 years, mean +/-…		Aged,Anti-Inflammatory Agents, Non-Steroidal,Cross-Over Studies,Double-Blind Method,Exercise,Female,Humans,Isometric Contraction,Magnetic Resonance Imaging,Male,Middle Aged,Muscle Contraction,Muscle Weakness,Muscle, Skeletal,Naproxen,Pain,Pain Measurement,Probability,Reference Values,Risk Assessment,Sensitivity and Specificity,administration & dosage,drug effects,physiology,physiopathology,preven…
Bassa2001	The effect of age on isokinetic concentric and eccentric moment of knee extensors	ISOKINETICS AND EXERCISE SCIENCE	9	4		155--161	2001																The aim of the present study was to examine the concentric and eccentric isokinetic moment of knee extensors in 108 boys aged 6 to 12 years and in 15 young adults. Participants performed isokinetic concentric and eccentric knee extensions at different angular velocities, 45degrees, 90degrees and 180degrees.s(-1). The Ancova designs, using lean mass as covariate, revealed a significant age effect.…
Brooks2001	Conditioning of skeletal muscles in adult and old mice for protection from contraction-induced injury	JOURNALS OF GERONTOLOGY SERIES A-BIOLOGICAL SCIENCES AND MEDICAL SCIENCES	56	4		B163--B171	2001																The purpose of this study was to design a conditioning program that protected muscles in both adult and old mice from a protocol of contractions that previously caused a significant number of damaged fibers and a deficit in force, Hind-limb dorsiflexor muscles of adult (7 months) and old (22 months) female B6D2F1 mice were exposed once a week to a protocol of repeated forced stretches while maxim…
Caruso2001	An isokinetic investigation of contractile mode's effect on the elbow flexors	JOURNAL OF STRENGTH AND CONDITIONING RESEARCH	15	1		69--74	2001																Healthy, sedentary, college-age subjects (n = 16) performed concentric or eccentric maximal unilateral isokinetic (1.08 rad.s(-1)) elbow flexor contractions (4 sets of 12 repetitions) to fatigue as physiological data were concurrently collected. Net caloric expenditure was determined using indirect calorimetry, whereas the electromyogram examined root mean square (RMS) and mean power frequency (M…
Chen2001	Effects of a 7-day eccentric training period on muscle damage and inflammation	MEDICINE AND SCIENCE IN SPORTS AND EXERCISE	33	10		1732--1738	2001																Purpose: This study examined the effects of a 7-d repeated maximal isokinetic eccentric training period on the indicators of muscle damage and inflammatory response. Methods: Twenty-two college-age males were randomly assigned to eccentric training (ET) (N = 12) and control groups (CON) (N = 10). The initial exercise was 30 repetitions of maximal voluntary isokinetic eccentric contraction (ECC1) …	as shown by the ET group's performance for 6 consecutive days after ECC1."
Childs2001	Supplementation with vitamin C and N-acetyl-cysteine increases oxidative stress in humans after an acute muscle injury induced by eccentric exercise.	Free radical biology & medicine	31	6	sep	745--753	2001																There has been no investigation to determine if the widely used over-the-counter, water-soluble antioxidants vitamin C and N-acetyl-cysteine (NAC) could act as pro-oxidants in humans during inflammatory conditions. We induced an acute-phase inflammatory response by an eccentric arm muscle injury. The inflammation was characterized by edema, swelling, pain, and increases in plasma inflammatory ind…		Acetylcysteine,Adult,Antioxidants,Ascorbic Acid,Bleomycin,Creatine Kinase,Dinoprost,Double-Blind Method,Exercise,F2-Isoprostanes,Glutathione Peroxidase,Humans,Interleukin-6,Iron,L-Lactate Dehydrogenase,Lipid Peroxidation,Lipid Peroxides,Male,Muscle, Skeletal,Myoglobin,Myositis,Oxidative Stress,Pain,Peroxidase,Placebos,Superoxide Dismutase,administration & dosage,adverse effects,analogs & derivati…
Damiano2001	Deficits in eccentric versus concentric torque in children with spastic cerebral palsy	MEDICINE AND SCIENCE IN SPORTS AND EXERCISE	33	1		117--122	2001																Purpose: The purposes of this study were to determine whether ambulatory children with spastic cerebral palsy (CP) had abnormal isokinetic eccentric peak torque values at the knee and ankle, and to gain further insights on the influence of spasticity on voluntary force production in this population. Methods: Twenty-four children with spastic CP (mean = 11.1 +/- 2.6 yr) and twenty children of comp…
Dolny2001	Validity of lower extremity strength and power utilizing a new closed chain dynamometer	MEDICINE AND SCIENCE IN SPORTS AND EXERCISE	33	1		171--175	2001																Purpose: The purpose of this study was to compare selected variables measured on a traditional isokinetic dynamometer (Cybex II) with a new lower extremity, closed chain dynamometer (Omnikinetic, OmK). Methods: Twelve subjects (6 male, 6 female, age = 28 +/- 5 yr, mean +/- SD) performed Cybex II knee flexion and extension at 1.05, 3.14, and 5.23 rad.s(-1). A maximal effort of 10 repetitions of lo…
Dore2001	Anaerobic cycling performance characteristics in prepubescent, adolescent and young adult females	EUROPEAN JOURNAL OF APPLIED PHYSIOLOGY	84	5	may	476--481	2001																The purpose of this study was to determine whether the relationships between short-term power and body dimensions in young females were similar whatever the age of the individuals. A cohort of 189 prepubescent (mean age 9.5 years), adolescent (mean age 14.4 years) and young adult (mean age 18.2 years) females performed three all-out sprints on a friction-loaded cycle ergometer against three braki…		,Adolescent,Aging,Anaerobiosis,Bicycling,Body Constitution,Body Weight,Child,Female,Humans,Leg,Organ Size,Puberty,Thinness,anatomy & histology,physiology
Durstine2001	Effects of short-duration and long-duration exercise on lipoprotein(a)	MEDICINE AND SCIENCE IN SPORTS AND EXERCISE	33	9		1511--1516	2001																Purpose: Most studies that use either a single exercise session, exercise training, or a cross-sectional design have failed to find a relationship between exercise and plasma lipoprotein(a) [Lp(a)] concentrations. However, a few studies investigating the effects of longer and/or more strenuous exercise have shown elevated Lp(a) concentrations, possibly as an acute-phase reactant to muscle damage.…
Evans2001	Protein nutrition and resistance exercise.	Canadian journal of applied physiology = Revue canadienne de physiologie appliquee	26 Suppl			S141--52	2001																Strength conditioning will result in an increase in muscle size and this increase in size is largely the result of increased contractile proteins. The mechanisms by which the mechanical events stimulate an increase in RNA synthesis and subsequent protein synthesis are not well understood. Lifting weight requires that a muscle shorten as it produces force (concentric contraction). Lowering the wei…		Aging,Animals,Dietary Proteins,Exercise,Humans,Insulin,Muscle Contraction,Muscle, Skeletal,Physical Endurance,physiology
Godard2001	Concentric and eccentric neuromuscular drive with a 12-week knee-extensor progressive resistance-training program in older men	Journal of Aging and Physical Activity	9	4		438--451	2001	Human Performance Laboratory, Ball State University, Muncie, IN 47306, United States		https://www.scopus.com/inward/record.uri?eid=2-s2.0-0034775671&doi=10.1123%2Fjapa.9.4.438&partnerID=40&md5=6b038088b52b923ceee43fca0e5e8c52												Cited By :2 Export Date: 12 October 2021	This investigation examined alterations in neuromuscular drive for dynamic and static muscle contractions, muscle strength, and cross-sectional area (CSA) with a 12-week progressive resistance-training program (PRT). Nine healthy men (70.0 Â± 1.7 years) were evaluated for maximal and submaximal neuromuscular drive (integrated electromyography [IEMG]), whole-muscle strength, isokinetic power, and …		Cross-sectional area,Electromyography,Muscle power,Sokinetic
Harrison2001	Treatment of exercise-induced muscle injury via hyperbaric oxygen therapy.	Medicine and science in sports and exercise	33	1	jan	36--42	2001																PURPOSE: This study examined the role of hyperbaric oxygen therapy (HBO) in the treatment of exercise-induced muscle injury. METHODS: 21 college-aged male volunteers were assigned to three groups: control, immediate HBO (iHBO), and delayed HBO (dHBO). All subjects performed 6 sets (10 repetitions per set) of eccentric repetitions with a load equivalent to 120% of their concentric maximum. HBO tre…		Adult,Creatine Kinase,Exercise,Humans,Hyperbaric Oxygenation,Isometric Contraction,Magnetic Resonance Imaging,Male,Muscle, Skeletal,blood,injuries,pathology,physiopathology
Hermann2001	Effects of eccentric exercise on trunk extensor torque and lumbar paraspinal EMG.	Medicine and science in sports and exercise	33	6	jun	971--977	2001																PURPOSE: Little is known about the effects of eccentric contractions on the function of the lumbar paraspinal muscles. The purpose of this study was to determine the effects of a single bout of eccentric contractions using the trunk extensor muscles on torque and lumbar paraspinal electromyographic (EMG) parameters. METHODS: Twenty healthy men between the ages of 18 and 49 yr participated in the …		Adolescent,Adult,Biomechanical Phenomena,Electromyography,Exercise,Humans,Lumbosacral Region,Male,Middle Aged,Muscle Contraction,Muscle Fatigue,Muscle, Skeletal,Torque,physiology
Hickner2001	Relationship between fat-to-fat-free mass ratio and decrements in leg strength after downhill running	JOURNAL OF APPLIED PHYSIOLOGY	90	4		1334--1341	2001																The purpose of this study was to determine whether greater body fat mass (FM) relative to lean mass would result in more severe muscle damage and greater decrements in leg strength after downhill running. The relationship between the FM-to-fat-free mass ratio (FM/FFM) and the strength decline resulting from downhill running (-11% grade) was investigated in 24 male runners [age 23.4 +/- 0.7 (SE) y…
Holder-Powell2001	Do knee injuries have long-term consequences for isometric and dynamic muscle strength?	European journal of applied physiology	85	3-4	aug	310--316	2001																To ascertain whether decrements in knee extensor muscle strength persist years after a traumatic ligamentous or meniscal knee injury, with reference to (1) the type of muscle activity, (2) the dominance of injury, and (3) the time since injury, 36 subjects with previous unilateral knee injuries were assessed. Peak voluntary quadriceps muscle strength was measured using the KinCom 500H dynamometer…		Adolescent,Adult,Female,Humans,Isometric Contraction,Knee Injuries,Male,Middle Aged,Muscle Contraction,Recovery of Function,Treatment Outcome,physiology,physiopathology,rehabilitation
Horstmann2001	Metabolic reaction after concentric and eccentric endurance-exercise of the knee and ankle.	Medicine and science in sports and exercise	33	5	may	791--795	2001																PURPOSE: Power training plays an essential part in many sport disciplines. The importance of eccentric power training remains a matter of controversial discussion. The objective of this study was therefore to investigate the difference in metabolic reaction between eccentric and concentric stress in comparable work. METHODS: Sixty-four men between 22 and 60 yr of age performed maximum isokinetic …		Adaptation, Physiological,Adult,Ammonia,Humans,Lactic Acid,Male,Middle Aged,Muscle Fatigue,Weight Lifting,blood,metabolism,physiology
Hortobagyi2001	Effects of standard and eccentric overload strength training in young women	MEDICINE AND SCIENCE IN SPORTS AND EXERCISE	33	7	jul	1206--1212	2001																Purpose: According to the force-velocity relationship of human skeletal muscle, the maximal load one can lift is limited by the concentric movement phase. and the eccentric phase is always underloaded. In the present study, we hypothesized that acute exercise training using an eccentric overload compared with standard loading would lend to greater neuromuscular and strength adaptations. Methods: …		,Adaptation,Adult,Electromyography,Exercise,Female,Humans,Isometric Contraction,Leg,Muscle,Nervous System Physiological Phenomena,Physical Education and Training,Physiological,Reproducibility of Results,Skeletal,Weight Lifting,methods,physiology
Hortobagyi2001a	Low- or high-intensity strength training partially restores impaired quadriceps force accuracy and steadiness in aged adults	JOURNALS OF GERONTOLOGY SERIES A-BIOLOGICAL SCIENCES AND MEDICAL SCIENCES	56	1	jan	B38--B47	2001																Because many daily tasks are executed at only a fraction of maximal strength, an understanding of submaximal force control may be important for improving function in aged adults. We compared the effects of low- and high-intensity (LI and HI, respectively) strength training on maximal and explosive strength and on the accuracy (force error) and steadiness (variability) of submaximal quadriceps for…		,80 and over,Adult,Age Distribution,Aged,Aging,Biomechanical Phenomena,Exercise,Female,Humans,Leg,Life Style,Male,Muscle,Random Allocation,Skeletal,Time Factors,physiology
Jacobs2001	Circuit training provides cardiorespiratory and strength benefits in persons with paraplegia.	Medicine and science in sports and exercise	33	5	may	711--717	2001																PURPOSE: This study tested the safety and the effects of circuit resistance training (CRT) on peak upper extremity cardiorespiratory endurance and muscle strength in chronic survivors of paraplegia due to spinal cord injury. METHODS: Ten men with chronic neurologically complete paraplegia at the T5-L1 levels participated in the study. Subjects completed 12 wk of CRT, using a series of alternating…		Adult,Cardiovascular Physiological Phenomena,Humans,Male,Middle Aged,Muscle, Skeletal,Paraplegia,Physical Endurance,Respiratory Function Tests,Spinal Cord Injuries,Weight Lifting,complications,physiology,rehabilitation
Jadelis2001	Strength, balance, and the modifying effects of obesity and knee pain: results from the Observational Arthritis Study in Seniors (oasis).	Journal of the American Geriatrics Society	49	7	jul	884--891	2001																OBJECTIVE: To examine the relationship between muscular strength and dynamic balance in a sample of older adults with knee pain and to determine the role that obesity and severity of knee pain play in the ability to maintain balance. DESIGN: Cross-sectional study designed to examine the association between strength and balance in a cohort of older adults with chronic knee pain. SETTING: A univers…		Activities of Daily Living,Aged,Body Mass Index,Chronic Disease,Cross-Sectional Studies,Female,Geriatric Assessment,Humans,Isometric Contraction,Longitudinal Studies,Male,Multivariate Analysis,Muscle Weakness,Obesity,Osteoarthritis, Knee,Pain,Pain Measurement,Postural Balance,Range of Motion, Articular,Regression Analysis,Risk Factors,Sensation Disorders,Severity of Illness Index,Surveys and Ques…
Jeon2001	Facilitation of quadriceps activation following a concentrically controlled knee flexion movement: The influence of transition rate	JOURNAL OF ORTHOPAEDIC & SPORTS PHYSICAL THERAPY	31	3		122--129	2001																Study Design: Single group repeated measures design. Objective: To determine ii the rate of transition between knee flexion and extension influences the subsequent concentric activation of the quadriceps and knee extension torque during reciprocal movements. Background: Preloading a muscle by stretching, a prior isometric or eccentric muscle action, or a prior movement controlled concentrically b…
Kaufman2001	Exercise-induced neuromuscular dysfunction under reflex conditions	EUROPEAN JOURNAL OF APPLIED PHYSIOLOGY	84	6		510--520	2001																The purpose of this research was to describe further the effects of exercise-induced muscle damage on reflex sensitivity. The subjects were eight physically active, but untrained males, between the ages of is and 29 years. The effects of eccentric and concentric exercise on patellar tendon reflex responses were determined. The 8 week experiment consisted of two, 5 day, test protocols with a 6 wee…
Kellis2001	Bilateral isokinetic concentric and eccentric strength profiles of the knee extensors and flexors in young soccer players	ISOKINETICS AND EXERCISE SCIENCE	9	1		31--39	2001																Isokinetic dynamometers are extensively used to monitor strength development in young soccer players. The purpose of this study was to examine the effects of age, velocity and leg of preference on the peak moments in young soccer players. One hundred and fifty eight soccer players (age = 13.2 +/- 2.1 years; height = 1.6 +/- 1.4: body mass = 51.6 +/- 14.89 kg) performed maximum knee extension and …
Kilmer2001	Response to high-intensity eccentric muscle contractions in persons with myopathic disease.	Muscle & nerve	24	9	sep	1181--1187	2001																Although the response to intense eccentric muscle contractions is well described in normal subjects, concern exists about possible untoward effects in persons with myopathic diseases. We investigated 14 subjects with slowly progressive muscular dystrophies including myotonic muscular dystrophy (n = 9), facioscapulohumeral dystrophy (n = 2), limb-girdle syndrome (n = 2), and Becker muscular dystro…		Adult,Creatine Kinase,Elbow Joint,Exercise Therapy,Female,Humans,Male,Middle Aged,Muscle Contraction,Muscle Weakness,Muscular Dystrophies,Muscular Dystrophy, Duchenne,Torque,blood,physiology,physiopathology,therapy
Kraemer2001	Influence of compression therapy on symptoms following soft tissue injury from maximal eccentric exercise	JOURNAL OF ORTHOPAEDIC & SPORTS PHYSICAL THERAPY	31	6		282--290	2001																Study Design: A between groups design was used to compare recovery following eccentric muscle damage under 2 experimental conditions. Objective: To determine if a compression sleeve donned immediately alter maximal eccentric exercise would enhance recovery of physical function and decrease symptoms of soreness. Background: Prior investigations using ice, intermittent compression, or exercise have…
Kuchenmeister2001	Effect of exercise on sarcoplasmic reticulum Ca2+ transport in muscle of mouse lines long-term selected for different performance traits	ARCHIV FUR TIERZUCHT-ARCHIVES OF ANIMAL BREEDING	44	4		441--450	2001																Mouse lines used were long-term selected for high (DU-hTP) or low treadmill performance (DU-ITP), or high locomotor open field activity (DU-hOF). The control line DU-Ks was maintained unselected. For each line 30 mice were used at 42 days of age. All lines were split into three groups: the first group was investigated without running exercise, the second had to run 500 m, and the third had to run…
Mafi2001	Superior short-term results with eccentric calf muscle training compared to concentric training in a randomized prospective multicenter study on patients with chronic Achilles tendinosis.	Knee surgery, sports traumatology, arthroscopy : official journal of the ESSKA	9	1		42--47	2001																In a previous uncontrolled pilot study we demonstrated very good clinical results with eccentric calf muscle training on patients with painful chronic Achilles tendinosis located at the 2-6 cm level in the tendon. In the present prospective multicenter study (Sundsvall and Ume{\aa}) patients with painful chronic Achilles tendinosis at the 2-6 cm level in the tendon were randomized to treatment wi…		Achilles Tendon,Adult,Chronic Disease,Exercise Therapy,Female,Humans,Leg,Male,Middle Aged,Muscle, Skeletal,Pain,Pain Management,Physical Therapy Modalities,Prospective Studies,Tendinopathy,Treatment Outcome,Weight-Bearing,etiology,pathology,physiology,therapy
Matheson2001	Electromyographic activity and applied load during seated quadriceps exercises.	Medicine and science in sports and exercise	33	10	oct	1713--1725	2001																PURPOSE: The aim of this study was to quantify and compare mean quadriceps muscle activity and applied load for eight seated quadriceps exercises using four types of resistance. METHODS: Using surface electromyography (EMG), the right rectus femoris (RF), vastus lateralis (VL), and vastus medialis oblique (VMO) muscles of 52 university students aged 23.5 +/- 3.4 yr (35 female and 17 male subjects…		Adult,Analysis of Variance,Biomechanical Phenomena,Electromyography,Ergometry,Exercise Therapy,Female,Humans,Leg,Male,Muscle Weakness,Muscle, Skeletal,Posture,Weight-Bearing,instrumentation,methods,physiology,therapy
McGibbon2001	Mechanical energy transfer during gait in relation to strength impairment and pathology in elderly women.	Clinical biomechanics (Bristol, Avon)	16	4	may	324--333	2001																OBJECTIVE: To examine the relationships among strength impairment, pathology and the mechanical energy transfers across the leg and low-back joints in a sample of frail elderly women with functional limitations. BACKGROUND: Past studies suggest mechanical energy analyses may be useful for identifying compensatory strategies used by elders during gait, but also suggest that age and strength are no…		Adaptation, Physiological,Aged,Aged, 80 and over,Aging,Analysis of Variance,Biomechanical Phenomena,Disabled Persons,Energy Metabolism,Female,Gait,Humans,Middle Aged,Muscle, Skeletal,Stress, Mechanical,physiology,physiopathology
Ohberg2001	Good clinical results but persisting side-to-side differences in calf muscle strength after surgical treatment of chronic Achilles tendinosis: a 5-year follow-up.	Scandinavian journal of medicine & science in sports	11	4	aug	207--212	2001																We have prospectively studied calf muscle strength (isokinetic concentric and eccentric muscle strength at 90 degrees/s and 225 degrees/s of angular velocity in 24 patients (17 males and 7 females, mean age 43.0 years) surgically treated for chronic Achilles tendinosis (at the 2-6 cm level in the tendon). The mean follow-up time was 5 years (range 31-82 months). Surgery was followed by immobiliza…		Achilles Tendon,Adult,Ankle,Athletic Injuries,Female,Follow-Up Studies,Humans,Isometric Contraction,Leg,Male,Middle Aged,Muscle Contraction,Muscle, Skeletal,Patient Satisfaction,Prospective Studies,Range of Motion, Articular,Recovery of Function,Tendinopathy,Torque,Treatment Outcome,injuries,physiology,physiopathology,rehabilitation,surgery
Pacileo2001	Left ventricular remodeling and mechanics after successful repair of aortic coarctation	AMERICAN JOURNAL OF CARDIOLOGY	87	6		748--752	2001																Forty normotensive patients (mean age 12.3 +/- 6.5 years) followed up after a successful repair of aortic coarctation (mean age at coarctectomy 5.1 +/- 4.8 yrs) were studied by echo-Doppler to (1) evaluate left ventricular (LV) remodeling and endocardial and midwall mechanics, and (2) identify factors that might predispose to persistent abnormalities. Sex- and age-specific cutoff levels for LV ma…
Pavlovskaya2001	Visual search in peripheral vision: learning effects and set-size dependence.	Spatial vision	14	2	jun	151--173	2001																Feature search for a light bar with one orientation (or color) embedded in an array of bars with a very different orientation (or color) is quick, easy and independent of the number of array elements. In contrast, search for a conjunction target has a linear response time dependence on the number of distractors. Training can improve performance of both these tasks. We report that these properties…		Adult,Color Perception,Humans,Learning,Middle Aged,Orientation,Vision, Ocular,Visual Perception,physiology
Ploutz-Snyder2001	Resistance training reduces susceptibility to eccentric exercise-induced muscle dysfunction in older women.	The journals of gerontology. Series A, Biological sciences and medical sciences	56	9	sep	B384--90	2001																This study evaluated the effect of age on susceptibility to muscular weakness and damage caused by eccentric (ECC) exercise and determined whether this susceptibility was altered by resistance training. Young and older women performed concentric (CON) and ECC one repetition maximum (1 RM) strength tests of the quadriceps femoris. Older women also performed knee extension training for 12 weeks. An…		Adult,Aged,Aging,Exercise,Female,Humans,Magnetic Resonance Imaging,Muscle Contraction,Physical Education and Training,physiology
Rawson2001	The effects of creatine supplementation on exercise-induced muscle damage.	Journal of strength and conditioning research	15	2	may	178--184	2001																This investigation evaluated the effects of oral creatine (Cr) supplementation on markers of exercise-induced muscle damage following high-force eccentric exercise in subjects randomly administered Cr or placebo (P) in a double-blind fashion. When injected, exogenous phosphocreatine has been shown to stabilize the muscle membrane in cardiac tissue and enhance recovery of strength and power follow…		Adult,Creatine,Dietary Supplements,Exercise,Humans,Male,Muscle, Skeletal,blood,drug effects,pathology,pharmacology
Rowlands2001	Effect of stride length manipulation on symptoms of exercise-induced muscle damage and the repeated bout effect	JOURNAL OF SPORTS SCIENCES	19	5		333--340	2001																This study assessed the effects of stride length on symptoms of exercise-induced muscle damage after downhill running and whether the extent of the symptoms sustained in a repeated bout of downhill running are influenced by stride length manipulation in the first bout. Eighteen males aged 21.1 +/- 0.6 years (mean +/- s) were allocated to one of three groups for bout one: preferred stride frequenc…
Sacheck2001	Role of vitamin E and oxidative stress in exercise	NUTRITION	17	10		809--814	2001																Reactive oxygen species (ROS) play an important role as mediators of skeletal muscle damage and inflammation after strenuous exercise. These ROS arise largely from increases in mitochondrial oxygen consumption and electron transport flux. Bouts of intense exercise are associated with increases in lipid peroxidation, generating malondialdehyde and F-2 alpha-isoprostanes, and the release of muscle …
Sacheck2001a	The effect of eccentric exercise on acute-phase response oxidative stress and cytokines in young and elderly men	FASEB JOURNAL	15	4		A417--A417	2001
Sandler2001	An analysis of the effect of lower extremity strength on impact severity during a backward fall.	Journal of biomechanical engineering	123	6	dec	590--598	2001																At least 280 000 hip fractures occur annually in the U.S. at an estimated cost of $9 billion. While over 90 percent of these are caused by falls, only about 2 percent of all falls result in hip fracture. Evidence suggests that the most important determinants of hip fracture risk during a fall are the body's impact velocity and configuration. Accordingly, protective responses for reducing impact v…	and thereby increased impact severity However	even with reductions of 80 percent in available torques	KEv was attenuated by 50 percent. This indicates the importance of both technique and strength in reducing impact severity. These results provide motivation for attempts to reduce elderly individuals' risk for fall-related injury through the combination of instruction in safe falling techniques and exercises that enhance lower extremity strength."
Seiple2001	Duration thresholds for target detection and identification in the peripheral visual field.	Optometry and vision science : official publication of the American Academy of Optometry	78	3	mar	169--176	2001																PURPOSE: In the current study, we measured threshold duration required to perform the tasks of letter identification, letter detection, grating orientation discrimination, and symmetry detection of targets presented as a function of retinal eccentricity. METHODS: Targets were presented in the nasal visual field on the horizontal meridian at eccentricities ranging from 0 degree to 22 degrees. Thre…		Adult,Form Perception,Humans,Middle Aged,Sensory Thresholds,Time Factors,Visual Fields,physiology
Silbernagel2001	Eccentric overload training for patients with chronic Achilles tendon pain--a randomised controlled study with reliability testing of the evaluation methods.	Scandinavian journal of medicine & science in sports	11	4	aug	197--206	2001																The purpose was to examine the reliability of measurement techniques and evaluate the effect of a treatment protocol including eccentric overload for patients with chronic pain from the Achilles tendon. Thirty-two patients with proximal achillodynia (44 involved Achilles tendons) participated in tests for reliability measures. No significant differences and strong (r=0.56-0.72) or very strong (r=…		Achilles Tendon,Adult,Ankle,Athletic Injuries,Exercise Therapy,Female,Follow-Up Studies,Humans,Male,Middle Aged,Outcome and Process Assessment, Health Care,Pain,Pain Management,Pain Measurement,Palpation,Patient Satisfaction,Range of Motion, Articular,Reproducibility of Results,Tendon Injuries,Walking,complications,diagnosis,etiology,injuries,methods,physiopathology,therapy
Svernlov2001	B.; Adolfsson	L."	Non-operative treatment regime including eccentric training for lateral humeral epicondylalgia.	Scandinavian journal of medicine & science in sports	11	6	dec	328--334	2001																In a pilot study 38 patients with lateral humeral epicondylalgia were randomly allocated to two treatment groups. Group S (stretching) was treated with a contract-relax-stretching program while group E (eccentric exercise) underwent an eccentric exercise program. Both groups also received forearm bands and wrist support nightly. The programs were carried out daily at home during 12 weeks. Evaluat…		Adult,Aged,Exercise Therapy,Female,Follow-Up Studies,Hand Strength,Humans,Male,Middle Aged,Pain Measurement,Pilot Projects,Prospective Studies,Range of Motion, Articular,Tennis Elbow,Treatment Outcome,physiology,rehabilitation
Trappe2001	Skeletal muscle PGF(2)(alpha) and PGE(2) in response to eccentric resistance exercise: influence of ibuprofen acetaminophen.	The Journal of clinical endocrinology and metabolism	86	10	oct	5067--5070	2001																PGs have been shown to modulate skeletal muscle protein metabolism as well as inflammation and pain. In nonskeletal muscle tissues, the over the counter analgesic drugs ibuprofen and acetaminophen function through suppression of PG synthesis. We previously reported that ibuprofen and acetaminophen inhibit the normal increase in skeletal muscle protein synthesis after high intensity eccentric resi…		Acetaminophen,Adult,Analgesics, Non-Narcotic,Anti-Inflammatory Agents, Non-Steroidal,Dinoprost,Dinoprostone,Double-Blind Method,Exercise,Humans,Ibuprofen,Male,Muscle, Skeletal,biosynthesis,drug effects,metabolism,pharmacology
Vandervoort2001	Resistance exercise throughout life	Orthopaedic Physical Therapy Clinics of North America	10	2		227--240	2001	School of Physical Therapy, University of Western Ontario, Elborn College, 1201 Western Road, London, Ont. N6G 1H1, Canada		https://www.scopus.com/inward/record.uri?eid=2-s2.0-0034957913&partnerID=40&md5=05ad534c7cfa2250f6f197f82d2a41e1												Cited By :1 Export Date: 12 October 2021	Suggestions for resistance exercises that involve concentric and eccentric phases are provided in Table 3. The initial phase of a program should involve comprehensive testing and evaluation, then the specific goals and needs of an older adult can be addressed to determine the choice of exercises. For functional benefits, the recommendations should mimic activity types that are present in daily li…
Vandervoort2001a	Functional and metabolic consequences of sarcopenia	CANADIAN JOURNAL OF APPLIED PHYSIOLOGY-REVUE CANADIENNE DE PHYSIOLOGIE APPLIQUEE	26	Annual Meeting Canadian-Society-for-Exercise-Physiology	feb	90--101	2001																Sarcopenia associated with the normal aging process is often combined with the detrimental effects of a sedentary lifestyle in older adults, leading to a significant reduction in reserve capacity of the neuromuscular system. A clear example of the aging effect is the pattern of reduction in muscle strength after the sixth decade for both isometric and concentric contractions. However older adults…		,Aging,Animals,Humans,Isometric Contraction,Muscle,Muscle Proteins,Skeletal,Weight Lifting,anatomy & histology,biosynthesis,cytology,metabolism,physiology
Willems2001	Force deficits after repeated stretches of activated skeletal muscles in female and male rats	ACTA PHYSIOLOGICA SCANDINAVICA	172	1		63--67	2001																Force deficits after stretches of activated plantar flexor muscles were measured in six male Sprague-Dawley rats (285 +/- 10 g, age 62 +/- 4 days, mean +/- SE) and compared with six age-matched (193 +/- 6 g, age 67 +/- 3 days) and six weight-matched female rats (273 +/- 7 g, age 141 +/- 9 days). Twenty stretches, imposed on isometric contractions at 90 degrees (0.2 ms pulse duration, 80 Hz, 5.4 +…
Yashiro2001	Effect of muscle contraction type and speed on tissue oxygen dynamics in the M. vastus medialis during repeated knee extension exercise	JAPANESE JOURNAL OF PHYSICAL FITNESS AND SPORTS MEDICINE	50	5		625--632	2001																The purpose of this study was to analyze the relationship between activity pattern and temporal changes in the oxygen dynamics of human femoral medial vastus muscles. Oxygen dynamics were evaluated from the surface of the body by near-infrared spectroscopy (NIRS). Arterial occlusion tests were performed in the femoral region at a cuff pressure of 300 mmHg. Exercise type and speed were controlled …
Bassa2002	Coactivation of knee muscles during isokinetic concentric and eccentric knee extensions and flexions in prepubertal gymnasts	ISOKINETICS AND EXERCISE SCIENCE	10	3		137--144	2002																Determining the activation of antagonist muscles around the knee joint in athletic children can provide useful information for the better understanding of the mechanisms responsible for strength production in athletic populations during developmental ages. The purpose of the present study was to examine possible differences on a) concentric and eccentric isokinetic torque scores of knee muscles a…
Bassa2002a	Concentric and eccentric isokinetic knee torque in pre-pubeiscent male gymnasts	JOURNAL OF HUMAN MOVEMENT STUDIES	42	3		213--227	2002																The primary purpose of this study was to investigate the association between long-term elite gymnastic training and isometric and isokinetic concentric and eccentric torques of the lower limbs in pre-pubertal boys. A secondary purpose was to describe the torque-velocity relationships and the reciprocal knee strength ratios found in the two groups. Twelve pre-pubertal gymnasts, aged 10.81+/-0.60 y…
Byrne2002	The effect of exercise-induced muscle damage on isometric and dynamic knee extensor strength and vertical jump performance.	Journal of sports sciences	20	5	may	417--425	2002																In this study, we assessed the effect of exercise-induced muscle damage on knee extensor muscle strength during isometric, concentric and eccentric actions at 1.57 rad x s(-1) and vertical jump performance under conditions of squat jump, countermovement jump and drop jump. The eight participants (5 males, 3 females) were aged 29.5+/-7.1 years (mean +/- s). These variables, together with plasma cr…		Adult,Creatine Kinase,Exercise,Female,Humans,Isometric Contraction,Knee Injuries,Knee Joint,Male,Movement,Muscle, Skeletal,Recovery of Function,Task Performance and Analysis,injuries,metabolism,physiology,physiopathology
Cleary2002	Temporal pattern of the repeated bout effect of eccentric exercise on delayed-onset muscle soreness	JOURNAL OF ATHLETIC TRAINING	37	1		32--36	2002																Objective: To determine the temporal pattern of the repeated bout effect of eccentric exercise on perceived pain and muscular tenderness associated with delayed-onset muscle soreness (DOMS). Design and Setting: Subjects completed 2 identical eccentric exercise bouts separated by 6, 7, 8, or 9 weeks. The experiment was conducted in a biokinetics research laboratory. Subjects: Sixteen male and 15 f…
Cowan2002	Physical therapy alters recruitment of the vasti in patellofemoral pain syndrome.	Medicine and science in sports and exercise	34	12	dec	1879--1885	2002																PURPOSE: To investigate the effect of physical therapy treatment on the timing of electromyographic (EMG) activity of the vasti in individuals with patellofemoral pain syndrome (PFPS). METHODS: Sixty-five (42 female, 23 male) participants aged 40 yr or less (29.2 +/- 7.8 yr) diagnosed with PFPS. Participants were randomly allocated into physical therapy treatment (McConnell-based) or placebo grou…		Adult,Cohort Studies,Electromyography,Exercise Therapy,Female,Femur,Follow-Up Studies,Humans,Joint Instability,Knee Joint,Locomotion,Male,Muscle Contraction,Observer Variation,Pain,Pain Measurement,Patella,Predictive Value of Tests,Statistics as Topic,Syndrome,Time Factors,Treatment Outcome,complications,physiology,physiopathology
Cowan2002a	Therapeutic patellar taping changes the timing of vasti muscle activation in people with patellofemoral pain syndrome.	Clinical journal of sport medicine : official journal of the Canadian Academy of Sport Medicine	12	6	nov	339--347	2002																OBJECTIVE: To examine the effect of the application of tape over the patella on the onset of electromyographic (EMG) activity of vastus medialis obliquus (VMO) relative to vastus lateralis (VL) in participants with and without patellofemoral pain syndrome (PFPS). DESIGN: Randomised within subject. SETTINGS: University laboratory. PARTICIPANTS: Ten participants with PFPS and 12 asymptomatic contro…		Adolescent,Adult,Analysis of Variance,Arthralgia,Bandages,Electromyography,Female,Femur,Follow-Up Studies,Humans,Knee Joint,Male,Middle Aged,Muscle Contraction,Muscle, Skeletal,Orthotic Devices,Pain Measurement,Patella,Range of Motion, Articular,Reference Values,Sensitivity and Specificity,Severity of Illness Index,Treatment Outcome,diagnosis,physiology,physiopathology,rehabilitation
Evans2002	Effects of exercise on senescent muscle.	Clinical orthopaedics and related research		403 Suppl	oct	S211--20	2002																Strength conditioning will result in an increase in muscle size and this increase in size is largely the result of increased contractile proteins. The mechanisms by which the mechanical events stimulate an increase in ribonucleic acid synthesis and subsequent protein synthesis are not well understood. Lifting weight requires that a muscle shorten as it produces force (concentric contraction). Low…		Aging,Animals,Contractile Proteins,Dietary Proteins,Exercise,HIV Infections,Humans,Insulin,Motor Activity,Muscle Contraction,Muscle Proteins,Muscle, Skeletal,Muscular Atrophy,Nutritional Requirements,Physical Conditioning, Animal,Physical Endurance,Physical Fitness,administration & dosage,metabolism,pathology,physiology,physiopathology
Fluckey2002	A rat resistance exercise regimen attenuates losses of musculoskeletal mass during hindlimb suspension	ACTA PHYSIOLOGICA SCANDINAVICA	176	4		293--300	2002																Exposure to microgravity and/or spaceflight causes dramatic losses in both muscle and bone mass. In normal gravity, resistance exercise has been effectively used to increase muscle and bone mass. We tested a novel form of resistance exercise training using flywheel technology as a countermeasure to offset the loss of musculoskeletal mass during 4 weeks of adult rat hindlimb suspension (HS), an un…
Forestier2002	Alteration of the position sense at the ankle induced by muscular fatigue in humans	Medicine and Science in Sports and Exercise	34	1		117--122	2002																Purpose: The purpose of this study was to investigate how an isometric exhaustion test affects the position sense at the ankle using an active matching task. Methods: Eight male subjects with a mean age 24.6 yr participated in the study. Subjects' ability to match the right ankle with the position of the left reference ankle position - determined using signed and absolute errors and variability -…	results showed that errors were significantly greater than the normal functioning range for 20Â° dorsiflexion and 10Â° plantarflexion positioning. Conclusions: The acuity of the position sense at the ankle is reduced subsequent to a fatigue protocol. The influence and the potential deleterious effects of muscular fatigue on position sense are discussed."		Fatigue-ankle,Kinesthesis,Proprioception
Gur2002	Hakan; Cakin	Nilg{\"{u}}n; Akova	Bedrettin; Okay	Ertan; K{\"{u}}{\c{c}}{\"{u}}koÄŸlu	Sel{\c{c}}uk; Gur	H.; Cakin	Nilg{\"{u}}n; Akova	Bedrettin; Okay	Ertan; Kucukoglu	S."	Concentric versus combined concentric-eccentric isokinetic training: Effects on functional capacity and symptoms in patients with osteoarthrosis of the knee		83	3	mar	308--316	2002
Haykowsky2002	Resistance training and cardiac hypertrophy - Unravelling the training effect	SPORTS MEDICINE	32	13		837--849	2002																Resistance training (RT) is a popular method of conditioning to enhance sport performance as well as an effective form of exercise to attenuate the age-mediated decline in muscle strength and mass. Although the benefits of RT on skeletal muscle morphology and function are well established, its effect on left ventricular (LV) morphology remains equivocal. Some investigations have found that RT is …
Heitkamp2002	Gain in thigh muscle strength after balance training in male and female judokas	ISOKINETICS AND EXERCISE SCIENCE	10	4		199--202	2002																In a previous study, balance training yielded a gain in strength in middle-aged men and women [6]. However, whether such training can yield positive results in highly conditioned athletes has not been addressed. A group of 10 male and 10 female judokas volunteered for a 6-week balance training on rolling boards, pegtops, soft mats and large rubber balls 3 times per week. Pre- and post training of…
Hoit2002	Naturally occurring variation in cardiovascular traits among inbred mouse strains	GENOMICS	79	5		679--685	2002																The objective of this study was to characterize genetic variation in complex cardiovascular traits in two commonly used inbred mouse strains. We performed echocardiography, graded treadmill exercise, tail cuff plethysmography, and telemetry (heart rate, activity, temperature) in age- (similar to 9 weeks) and sex-matched A/J and C57BL/6J (136) inbred mice. B6 mice had significantly larger end-dias…	that is, eccentric, physiologic hypertrophy, slower heart rates, and increased exercise endurance. This systematic characterization of functionally related cardiovascular traits in A/J and C57BL/6J mice revealed numerous differences whose genetic bases can be dissected with recombinant inbred, recombinant congenic, and chromosome substitution strains.
Hortobagyi2002	Muscle adaptations to 7 days of exercise in young and older humans: Eccentric overload versus standard resistive training	JOURNAL OF AGING AND PHYSICAL ACTIVITY	10	3		290--305	2002	Biomechanics Laboratory, Greenville, NC 27858, United States		https://www.scopus.com/inward/record.uri?eid=2-s2.0-0036071313&doi=10.1123%2Fjapa.10.3.290&partnerID=40&md5=89fade4cf0e328d81d76524c4ccaa735												From Duplicate 1 (Muscle adaptations to 7 days of exercise in young and older humans: Eccentric overload versus standard resistive training - Hortob{\'{a}}gyi, T; Money, J; Zheng, D; Dudek, R; Fraser, D; Dohm, L) Cited By :6 Export Date: 12 October 2021	This study compared muscle adaptations after 7 days of exercise with eccentric-overload (EO) or standard (ST) resistive training in young (20 years) and older (69 years) adults. Young EO and ST gained 103 and 30 N, respectively, and older EO and ST gained 63 and 25 N of strength, respectively (all p <.05). Types I and IIa MHC mRNA levels were not altered, but Type IIx levels decreased 31% and 63%…		,Aging,Skeletal muscle,Strength training
Hughes2002	Impact of endurance concentric contraction training on acute force deficit following in vitro lengthening contractions	European Journal of Applied Physiology	87	3		283--289	2002	Department of Physical Therapy, Exercise and Nutrition Sciences, University at Buffalo, State University of New York, Buffalo, NY 14214, United States		https://www.scopus.com/inward/record.uri?eid=2-s2.0-0036652088&doi=10.1007%2Fs00421-002-0635-z&partnerID=40&md5=2cbe008cde02ec1302cb7e9b7094e648												Cited By :2 Export Date: 12 October 2021	The purposes of this study were to (1) determine whether endurance training employing solely concentric contractions would reduce force deficit following lengthening contractions, and (2) to determine if aged skeletal muscle would respond similarly from training, compared with young animals. Young (3-month) and old (23-month) male Fischer 344 rats were randomly assigned to either a control or an …		Eccentric contractions,Exercise,Muscle injury
Iki2002	Greater trunk muscle torque reduces postmenopausal bone loss at the spine independently of age, body size, and vitamin D receptor genotype in Japanese women.	Calcified tissue international	71	4	oct	300--307	2002																Bone mineral density (BMD) is affected by muscle strength. Recently, vitamin D receptor (VDR) genotype was reported to affect muscle strength as well as BMD in Caucasian women. The aim of this study was to evaluate independent effects of muscle strength of the trunk on BMD at the spine and its change over time in Japanese women. We followed 119 healthy postmenopausal women for 4 years and determi…		Absorptiometry, Photon,Age Factors,Body Constitution,Bone Density,Confounding Factors, Epidemiologic,DNA,Female,Genotype,Humans,Isometric Contraction,Japan,Longitudinal Studies,Lumbar Vertebrae,Lumbosacral Region,Middle Aged,Muscle Contraction,Muscle, Skeletal,Osteoporosis, Postmenopausal,Polymerase Chain Reaction,Polymorphism, Restriction Fragment Length,Receptors, Calcitriol,Torque,analysis,dia…
Jacobs2002	Circuit resistance training in persons with complete paraplegia.	Journal of rehabilitation research and development	39	1		21--28	2002																BACKGROUND/OBJECTIVE: We assessed the metabolic and heart rate (HR) responses to a single session of circuit resistance training (CRT) in six subjects with complete paraplegia (T5-T12 levels) in order to determine the caloric cost of the exercise. METHODS: Subjects underwent isoinertial weight training exercises with interspersed periods of high-cadence, low-resistance arm ergometry (AE). Followi…		Adult,Energy Metabolism,Exercise Test,Heart Rate,Humans,Male,Middle Aged,Oxygen Consumption,Paraplegia,Prospective Studies,Respiratory Function Tests,Sensitivity and Specificity,Spinal Cord Injuries,Thoracic Vertebrae,diagnosis,injuries,methods,physiology,rehabilitation
Khan2002	Low vision rehabilitation in patients with age-related macular degeneration at a tertiary eye care centre in southern India.	Clinical & experimental ophthalmology	30	6	dec	404--410	2002																PURPOSE: To evaluate the specific needs and types of low vision devices (LVDs) in patients with age-related macular degeneration (AMD) so as to use the residual vision effectively. METHODS: One hundred consecutive patients with diagnosis of AMD were evaluated to ascertain the degree of visual disability. Different LVDs were used to suit the specific needs of individual patients. The distribution …		Aged,Aged, 80 and over,Female,Health Services Needs and Demand,Humans,India,Macular Degeneration,Male,Middle Aged,Ophthalmology,Sensory Aids,Vision, Low,Visual Acuity,Visually Impaired Persons,complications,etiology,instrumentation,rehabilitation,statistics & numerical data
Krishnathasan2002	Ankle plantar flexion strength in resistance and endurance trained middle-aged adults.	Canadian journal of applied physiology = Revue canadienne de physiologie appliquee	27	5	oct	479--490	2002																Maximum concentric (CONC) and eccentric (ECC) strength of the ankle plantar flexor muscles were compared between middle-aged adults who regularly participated in resistance exercise training versus those who participated in weight-bearing endurance exercise. A total of 40 men and women with a mean age of 48.9 years (SD = 5.3) were tested for CONC and ECC plantar flexor (PF) strength, using an iso…		Adult,Ankle,Exercise,Female,Humans,Male,Middle Aged,Muscle, Skeletal,Physical Endurance,physiology
Lindstedt2002	Chronic eccentric exercise as a countermeasure for high-fall risk elderly individuals	FASEB JOURNAL	16	4		A449--A449	2002
Lund2002	Volume estimation of extensor muscles of the lower leg based on MR imaging	EUROPEAN RADIOLOGY	12	12		2982--2987	2002																Magnetic resonance imaging can be used to measure the muscle volume of a given muscle or muscle group. The purpose of this study was to determine both the intra- and inter-observer variation of the manually outlined volume of the extensor muscles (tibialis anterior, extensor digitorum longus and extensor hallucis longus), to estimate the minimum number of slices needed for these calculations and …
Maria2002	Comparison of peak muscle power between Brazilian and French girls	AMERICAN JOURNAL OF HUMAN BIOLOGY	14	3		364--371	2002																This study examined the muscle power of Brazilian circumpubertal girls and extended the analysis to a cross-cultural dimension. A total of 462 children, 123 Brazilian girls and 339 French girls, 9-18 years, participated in this investigation. Anthropometric data included body mass (BM), height, skinfold thicknesses, and estimated lean log volume (LLV). All subjects completed a physical activity q…
Mattacola2002	Strength, functional outcome, and postural stability after anterior cruciate ligament reconstruction	JOURNAL OF ATHLETIC TRAINING	37	3		262--268	2002																Objective: To compare postural stability, single-leg hop, and isokinetic strength measurements in subjects after anterior cruciate ligament (ACL) reconstruction with an age- and activity-matched control group. Design and Setting: Subjects reported to a sports medicine/athletic training research laboratory for testing. Subjects reported for one testing session for a total test time of 1 hour. Subj…
McArdle2002	Exercise and skeletal muscle ageing: cellular and molecular mechanisms	AGEING RESEARCH REVIEWS	1	1		79--93	2002																As we age, our skeletal muscle becomes smaller and weaker. In addition, the remaining muscle is more susceptible to damage, particularly following exercise, recovery from damage is severely impaired and muscle is unable to adapt rapidly following sequential periods of exercise. The mechanisms by which skeletal muscle damage occurs are poorly understood and the role that an increased production of…
McGibbon2002	Compensatory gait mechanics in patients with unilateral knee arthritis	JOURNAL OF RHEUMATOLOGY	29	11		2410--2419	2002																Objective. Few studies exist on gait adaptation caused by knee osteoarthritis (OA), and those have only explored adaptations of the kinematics and kinetics of the knee joint itself. We characterize ankle, knee, hip, and low back mechanical energy expenditures (MEE) and compensations (MEC) during gait in patients with knee OA. Methods. Thirteen elderly patients with unilateral knee OA and 10 match…
Messier2002	Declines in strength and balance in older adults with chronic knee pain: a 30-month longitudinal, observational study.	Arthritis and rheumatism	47	2	apr	141--148	2002																OBJECTIVES: To document changes in lower extremity strength and balance over a 30-month period in older adults with chronic knee pain, and to identify relationships among these variables that may prove useful in designing a subsequent clinical intervention trial. METHODS: This longitudinal, 30-month, observational study was designed to examine the association of physical, psychological, social, a…		Aged,Aged, 80 and over,Ankle,Chronic Disease,Disease Progression,Female,Humans,Knee,Likelihood Functions,Longitudinal Studies,Male,Muscle, Skeletal,Osteoarthritis, Knee,Pain,Postural Balance,physiology,physiopathology
Meyers2002	Efficacy of stairclimber versus cycle ergometry in postoperative anterior cruciate ligament rehabilitation	CLINICAL JOURNAL OF SPORT MEDICINE	12	2		85--94	2002																Objective: To examine the effective use of stairclimbing as an alternative to cycling for knee rehabilitation in an actual injured sport population. Design: Repeated-measures multivariate analyses with data collected during anterior cruciate ligament (ACL) rehabilitation. Setting: Clinical rehabilitation setting following ACL reconstruction. Participants: 46 athletes with ACL reconstruction (32 m…
Minder2002	Interferential therapy: lack of effect upon experimentally induced delayed onset muscle soreness.	Clinical physiology and functional imaging	22	5	sep	339--347	2002																This study was designed to assess the analgesic effects of interferential therapy (IFT) on experimentally induced muscular pain under randomized, double-blind, placebo-controlled conditions. After ethical approval and written consent were obtained, 40 healthy human volunteers (20 males: 20 females) aged 18-25 years were recruited and randomly assigned to one of four experimental groups (n = 10 pe…		Adolescent,Adult,Double-Blind Method,Elbow Joint,Electric Stimulation Therapy,Exercise,Female,Humans,Isometric Contraction,Male,Muscle, Skeletal,Pain Management,Pain Measurement,Pain Threshold,Posture,Torque,physiology
Nash2002	A comparison of 2 circuit exercise training techniques for eliciting matched metabolic responses in persons with paraplegia.	Archives of physical medicine and rehabilitation	83	2	feb	201--209	2002																OBJECTIVE: To test whether acute metabolic (VO(2)), chronotropic (heart rate), and perceptual (rating of perceived exertion; RPE) responses to exercise by persons with paraplegia differ when the exercise is on a multistation isoinertial exercise system (MultiGym) or on a customized system of Thera-Band resistance bands (ElasticGym). DESIGN: Within-subjects comparison of 2 treatments. SETTING: Aca…		Adult,Analysis of Variance,Exercise,Female,Heart Rate,Humans,Male,Middle Aged,Oxygen Consumption,Paraplegia,Physical Exertion,Sports Equipment,physiology,rehabilitation
Nemet2002	Effect of intense exercise on inflammatory cytokines and growth mediators in adolescent boys	PEDIATRICS	110	4		681--689	2002																Objective. Exercise can enhance growth and development in children, but recent investigations have revealed an intriguing paradox. Namely, the early (4-5 weeks) response to training programs in children lead to a catabolic, growth hormone (GH)-resistant state rather than the expected anabolic activation of the GH-->insulin-like growth factor-I (IGF-I) axis. This paradox led us to hypothesize that…
Plotnikoff2002	Test-retest reliability of glenohumeral internal and external rotator strength	CLINICAL JOURNAL OF SPORT MEDICINE	12	6		367--372	2002																Objective: To establish test-retest reliability for a strength testing protocol of the glenohumeral internal and external rotator muscles using a KinCom (Chattanooga Group, Hixson, TN) isokinetic dynamometer. Design: Prospective test-retest reliability study. Setting: Rehabilitation research laboratory. Participants: Fourteen volunteers between the ages of 27 and 35 years participated in the stud…
Pringle2002	Oxygen uptake kinetics during horizontal and uphill treadmill running in humans	EUROPEAN JOURNAL OF APPLIED PHYSIOLOGY	88	1-2		163--169	2002																The aim of this study was to examine the effect of increasing the ratio of concentric to eccentric muscle activation on oxygen uptake (V(O2)) kinetics during treadmill running. Nine subjects [2 women; mean (SD) age 29 (7) years, height 1.77 (0.07) in, body mass 73.0 (7.5) kg] completed incremental treadmill tests to exhaustion at 0% and 10% gradients to establish the gradient-specific ventilatory…
Ratel2002	Effects of age and recovery duration on peak power output during repeated cycling sprints.	International journal of sports medicine	23	6	aug	397--402	2002																The aim of the present study was to investigate the effects of age and recovery duration on the time course of cycling peak power and blood lactate concentration ([La]) during repeated bouts of short-term high-intensity exercise. Eleven prepubescent boys (9.6 +/- 0.7 yr), nine pubescent boys (15.0 +/- 0.7 yr) and ten men (20.4 +/- 0.8 yr) performed ten consecutive 10 s cycling sprints separated b…		Adolescent,Adult,Aging,Bicycling,Child,Fatigue,Humans,Lactic Acid,Male,Oxygen Consumption,Physical Exertion,blood,metabolism,physiology
Reijneveld2002	Response to exercise of patients with idiopathic hyper-CK-emia	MUSCLE & NERVE	26	6		832--837	2002																Patients with an idiopathic increase in serum creatine kinase (CK) levels (hyper-CK-emia) have a benign prognosis, but symptoms may be disabling in daily life. Previous studies have suggested that physical exercise increases the severity of complaints in these patients. We studied whether maximal and submaximal bouts of exercise on a cycle ergometer are harmful for patients with idiopathic hyper-…
Schulze2002	Resistance training preserves skeletal muscle function during unloading in humans.	Medicine and science in sports and exercise	34	2	feb	303--313	2002																PURPOSE: The intent of this investigation was to design and evaluate a low-volume, high-intensity resistance-training program to preserve knee extensor (KE) and plantar flexor (PF) size as measured by cross-sectional area (CSA), strength, and neuromuscular function (IEMG) with unloading. METHODS: Thirty-two men (age = 30 +/- 3 yr; weight = 80 +/- 4 kg; height = 181 +/- 2 cm) participated. Sixteen…		Adult,Anthropometry,Electromyography,Energy Intake,Exercise,Hindlimb Suspension,Humans,Knee,Male,Middle Aged,Muscle Contraction,Muscle, Skeletal,Physical Education and Training,Torque,methods,physiology
Sharwood2002	Changes in oxygen consumption during and after a downhill run in masters long-distance runners.	Clinical journal of sport medicine : official journal of the Canadian Academy of Sport Medicine	12	5	sep	308--312	2002																OBJECTIVE: To determine whether oxygen consumption during submaximal running increases in proportion to years of accumulated training and racing in masters runners after a bout of downhill running. SETTING: University of Cape Town, Sports Science Institute of South Africa. PARTICIPANTS: Seventeen male masters distance runners (45-55 years) with a range of training (3,536 km to 79,320 km) and raci…		Age Factors,Aging,Altitude,Analysis of Variance,Energy Metabolism,Exercise Test,Heart Rate,Humans,Male,Middle Aged,Muscle, Skeletal,Oxygen Consumption,Physical Endurance,Recruitment, Neurophysiological,Running,Sensitivity and Specificity,Time Factors,injuries,metabolism,physiology
Signorile2002	A comparative electromyographical investigation of muscle utilization patterns using various hand positions during the lat pull-down.	Journal of strength and conditioning research	16	4	nov	539--546	2002																This study aimed at investigating the effects of different hand positions on the electromyographic (EMG) activity of shoulder muscles during the performance of the lat pull-down exercise. Ten healthy men performed 3 repetitions of the lat pull-down exercise using their experimentally determined 10RM (repetition maximum) weight. Four different common variations of the lat pull-down were used: clos…		Adolescent,Adult,Analysis of Variance,Arm,Cohort Studies,Electromyography,Exercise,Hand,Humans,Male,Middle Aged,Muscle Contraction,Pectoralis Muscles,Posture,Sensitivity and Specificity,Weight Lifting,physiology
Sjodahl2002	C.; Jarnlo	G. B.; S{\"{o}}derberg	B.; Persson	B. M.; Sjodahl	C.; Jarnlo	G. B.; Soderberg	B.; Persson	B. M."	Kinematic and kinetic gait analysis in the sagittal plane of trans-femoral amputees before and after special gait re-education	PROSTHETICS AND ORTHOTICS INTERNATIONAL	26	2	aug	101--112	2002
Sullivan2002	An experimental investigation of the relation between catastrophizing and activity intolerance.	Pain	100	1-2	nov	47--53	2002																The present study examined the value of a measure of catastrophizing as a predictor of activity intolerance in response to delayed onset muscle soreness (DOMS). A sample of 50 (17 men, 33 women) sedentary undergraduates participated in an exercise protocol designed to induce muscle soreness and were asked to return 2 days later to perform the same physical maneuvers. Participants performed five s…		Adolescent,Adult,Affect,Disability Evaluation,Exercise,Female,Humans,Male,Middle Aged,Negativism,Pain,Physical Endurance,psychology
Toft2002	Cytokine response to eccentric exercise in young and elderly humans.	American journal of physiology. Cell physiology	283	1	jul	C289--95	2002																To examine the plasma interleukin (IL)-6 response in elderly (E) and young (Y) humans, 10 E and 10 Y subjects completed 60 min of eccentric lower limb exercise at the same relative oxygen uptake. Plasma IL-6 was measured before, immediately after, and 5 days into recovery from exercise, as were the biochemical markers of muscle damage, creatine kinase (CK), and myoglobin. In both groups, IL-6 inc…		Adult,Aged,Aging,Bicycling,Biomarkers,Creatine Kinase,Cytokines,Exercise,Humans,Interleukin-6,Leukocyte Count,Lymphocyte Count,Muscle, Skeletal,Myoglobin,Neutrophils,Organ Size,Physical Exertion,Workload,anatomy & histology,blood,cytology,physiology
Trappe2002	Effect of ibuprofen and acetaminophen on postexercise muscle protein synthesis.	American journal of physiology. Endocrinology and metabolism	282	3	mar	E551--6	2002																We examined the effect of two commonly consumed over-the-counter analgesics, ibuprofen and acetaminophen, on muscle protein synthesis and soreness after high-intensity eccentric resistance exercise. Twenty-four males (25 +/- 3 yr, 180 +/- 6 cm, 81 +/- 6 kg, and 17 +/- 8% body fat) were assigned to one of three groups that received either the maximal over-the-counter dose of ibuprofen (IBU; 1,200 …		Acetaminophen,Adult,Anti-Inflammatory Agents, Non-Steroidal,Creatine Kinase,Deuterium,Double-Blind Method,Exercise,Humans,Ibuprofen,Kinetics,Male,Muscle Proteins,Muscle, Skeletal,Phenylalanine,Placebos,administration & dosage,biosynthesis,blood,drug effects,metabolism,pharmacology,physiology
Trappe2002a	Titin and nebulin content in human skeletal muscle following eccentric resistance exercise.	Muscle & nerve	25	2	feb	289--292	2002																We measured titin and nebulin content in muscle biopsies from the vastus lateralis before and 24 h after one bout of high-intensity eccentric knee extensor resistance exercise in seven men (26 +/- 3 years). Titin and nebulin content were significantly (P < 0.05) reduced after exercise by 30 and 15%, respectively. These results suggest that the structural components of the myofibrillar apparatus a…		Adult,Connectin,Humans,Male,Muscle Proteins,Muscle, Skeletal,Protein Kinases,Weight Lifting,metabolism,physiology
Vandervoort2002	Aging of the human neuromuscular system.	Muscle & nerve	25	1	jan	17--25	2002																Loss of cells from the motor system occurs during the normal aging process, leading to reduction in the complement of motor neurons and muscle fibers. The latter age-related decrease in muscle mass has been termed sarcopenia" and is often combined with the detrimental effects of a sedentary lifestyle in older adults	leading to a significant reduction in reserve capacity of the neuromuscular system	which is the primary subject of this review. Clear evidence of this aging effect is seen when voluntary or stimulated muscle strength is compared across the adult lifespan	with a steady decline of approximately 1-2% per year occurring after the sixth decade. Interestingly	when compared with isometric contractions
Willems2002	Proprioception and muscle strength in subjects with a history of ankle sprains and chronic instability	JOURNAL OF ATHLETIC TRAINING	37	4		487--493	2002																Objective: To examine if patients with chronic ankle instability or a history of ankle sprains without chronic instability have worse proprioception or less invertor and evertor muscle strength. Design and Setting: We assessed proprioception and muscle strength on the Biodex isokinetic dynamometer in the laboratory of the Department of Sports Medicine, University Hospital Ghent. Subjects: Subject…
Wu2002	Improvement of isokinetic knee extensor strength and reduction of postural sway in the elderly from long-term Tai Chi exercise.	Archives of physical medicine and rehabilitation	83	10	oct	1364--1369	2002																OBJECTIVES: To compare isokinetic strength of leg muscles and foot center of pressure (COP) as a measure of sway between long-term Tai Chi practitioners and controls. DESIGN: Cross-sectional study. SETTING: Community setting. PARTICIPANTS: Twenty subjects in the Tai Chi group and 19 subjects in the control group (age, >55 y). INTERVENTION: Subjects in Tai Chi group had practiced Tai Chi for a min…		Aged,Cross-Sectional Studies,Female,Humans,Knee Joint,Male,Middle Aged,Muscle, Skeletal,Posture,Tai Ji,physiology
Yates2002	Effects of osteopathic manipulative treatment and concentric and eccentric maximal-effort exercise on women with multiple sclerosis: a pilot study.	The Journal of the American Osteopathic Association	102	5	may	267--275	2002																The research objectives of this study were to evaluate the effects of osteopathic manipulative treatment (OMT) combined with maximal-effort exercise (MEE) on strength, coordination, endurance, and fatigue in female patients with multiple sclerosis (MS). Seven female subjects with MS participated in the 12-week study, which included intervention with OMT and MEE twice per week. Standardized tests …		Adult,Aged,Exercise,Exercise Tolerance,Female,Follow-Up Studies,Humans,Manipulation, Osteopathic,Middle Aged,Multiple Sclerosis,Muscle Fatigue,Physical Exertion,Pilot Projects,Prospective Studies,Sensitivity and Specificity,Severity of Illness Index,Treatment Outcome,diagnosis,methods,therapy
Alfredson2003	Chronic midportion Achilles tendinopathy: an update on research and treatment.	Clinics in sports medicine	22	4	oct	727--741	2003																Chronic painful midportion Achilles tendinosis has been known as a difficult condition to treat, and surgical treatment was often needed. In recent scientific studies, however, treatment with painful eccentric calf muscle training has shown very good short-term clinical results and significantly reduced the need for surgical treatment. Also, very recently, a new method consisting of sclerosing of…		Achilles Tendon,Adult,Athletic Injuries,Chronic Disease,Humans,Middle Aged,Pain,Physical Therapy Modalities,Tendinopathy,complications,etiology,methods,physiopathology,surgery,therapy
Alfredson2003a	Intratendinous glutamate levels and eccentric training in chronic Achilles tendinosis: a prospective study using microdialysis technique.	Knee surgery, sports traumatology, arthroscopy : official journal of the ESSKA	11	3	may	196--199	2003																Microdialysis has shown intratendinous glutamate levels to be significantly higher in Achilles tendons with painful tendinosis than in normal pain-free tendons, and treatment with eccentric training has shown good clinical results with diminished tendon pain during activity. In six patients with chronic painful Achilles tendinosis we performed microdialysis for 2 h, before and after the 12-week e…		Achilles Tendon,Chronic Disease,Female,Glutamic Acid,Humans,Male,Microdialysis,Middle Aged,Pain Measurement,Physical Education and Training,Prospective Studies,Tendinopathy,Treatment Outcome,Weight-Bearing,analysis,metabolism,rehabilitation
Alkner2003	Hans E.; Kozlovskaya	Inessa; Sayenko	Dimitri; Tesch	Per A."	Effects of strength training, using a gravity-independent exercise system, performed during 110 days of simulated space station confinement.	European journal of applied physiology	90	1-2	sep	44--49	2003																The efficacy of a resistance exercise paradigm, using a gravity-independent flywheel principle, was examined in four men subjected to 110 days of confinement (simulation of flight of international crew on space station; SFINCSS-99). Subjects performed six upper- and lower-body exercises (calf raise, squat, back extension, seated row, lateral shoulder raise, biceps curl) 2-3 times weekly during th…
Anderson2003	A comparison of eccentric isokinetic torque production and velocity of knee flexion angle during step down in patellofemoral pain syndrome patients and unaffected subjects.	Clinical biomechanics (Bristol, Avon)	18	6	jul	500--504	2003																OBJECTIVE: To determine knee angular velocity changes during stair descent and slow velocity eccentric isokinetic quadriceps contraction, in normal controls and patellofemoral pain syndrome patients. DESIGN: Isokinetic and kinematic analysis of the performance of patellofemoral pain syndrome patients and matched normal controls. BACKGROUND: In the presence of increased patellofemoral joint stress…		Aged,Biomechanical Phenomena,Female,Humans,Knee Joint,Middle Aged,Movement,Muscle Contraction,Muscle, Skeletal,physiology
Andersson2003	Adults with cerebral palsy: walking ability after progressive strength training.	Developmental medicine and child neurology	45	4	apr	220--228	2003																The purpose of this study was to evaluate effects of a progressive strength training programme on walking ability in adults with cerebral palsy. Ten individuals with spastic diplegia (seven males, three females; mean age 31, range 23-44 years) participated twice a week over 10 weeks. Seven individuals with spastic diplegia (four males, three females; mean age 33, range 25-47 years) who did not re…		Adult,Cerebral Palsy,Female,Humans,Isometric Contraction,Male,Middle Aged,Movement Disorders,Muscle Spasticity,Muscle, Skeletal,Range of Motion, Articular,Severity of Illness Index,Supine Position,Teaching,Walking,complications,diagnosis,etiology,methods,physiology,physiopathology,therapy
Bajaj2003	Prophylactic tolperisone for post-exercise muscle soreness causes reduced isometric force--a double-blind randomized crossover control study.	European journal of pain (London, England)	7	5		407--418	2003																The role of tolperisone hydrochloride, a centrally acting muscle relaxant in relieving painful muscle spasm is recently being discussed. The present study hypothesizes that the prophylactic use of tolperisone hydrochloride may effectively relieve post-exercise muscle soreness, based on the spasm theory of exercise pain. Twenty male volunteers, aged 25.2 +/- 0.82 years (mean +/- SEM) participated …		Adult,Cross-Over Studies,Double-Blind Method,Electromyography,Exercise,Humans,Isometric Contraction,Male,Muscle Relaxants, Central,Muscle, Skeletal,Pain,Pain Measurement,Physical Exertion,Range of Motion, Articular,Recovery of Function,Spasm,Tolperisone,Treatment Outcome,adverse effects,drug effects,drug therapy,etiology,pharmacology,physiology,physiopathology,prevention & control
Baum2003	T.; Essfeld	D."	Reduction of blood pressure response during strength training through intermittent muscle relaxations.	International journal of sports medicine	24	6	aug	441--445	2003																The increase in blood pressure during training is a disadvantage of strength training in the elderly. To reduce this effect it is generally recommended to apply lower levels of relative muscle strength with longer contraction durations or higher number of repetitions (continuous mode (CM), e. g. 50% of maximal strength, 10 to 15 repetitions without pauses). Alternatively, higher contraction force…		Adult,Aged,Blood Pressure,Exercise,Humans,Male,Middle Aged,Muscle Relaxation,Time Factors,Weight Lifting
Birtles2003	Effect of eccentric exercise on patients with chronic exertional compartment syndrome.	European journal of applied physiology	88	6	feb	565--571	2003																There are a number of similarities between chronic exertional compartment syndrome (CECS) and the effects of high force eccentric contractions in healthy controls. We hypothesised that CECS patients would be particularly susceptible to pain, fatigue and swelling after eccentric exercise. Ten CECS patients [aged 30.3 (8.0) years, mean (SD)], 7 males) and 14 healthy controls [aged 32.3 (9.0) years,…		Adult,Ankle,Anterior Compartment Syndrome,Chronic Disease,Exercise,Exercise Test,Female,Humans,Isometric Contraction,Male,Muscle, Skeletal,Pain,Physical Exertion,Reference Values,Reproducibility of Results,Sensitivity and Specificity,Stress, Mechanical,Ultrasonography,anatomy & histology,complications,diagnostic imaging,etiology,physiopathology
Chan2003	Kinematic and electromyographic analysis of the push movement in tai chi.	British journal of sports medicine	37	4	aug	339--344	2003																BACKGROUND: Tai chi is a form of exercise derived from the martial art folk traditions of China. The force used in tai chi includes different principles of mechanical advantage. No studies on the kinematic features of tai chi exercise have been published. OBJECTIVE: To analyse the kinematics and electromyographic characteristics of tai chi. METHODS: An experienced tai chi master was asked to perf…		Electromyography,Gravitation,Humans,Male,Middle Aged,Movement,Muscle Contraction,Muscle, Skeletal,Posture,Range of Motion, Articular,Tai Ji,Videotape Recording,methods,physiology
Cohen2003	Modified astigmatism dial diagram for locating eccentric fixation in patients with central scotoma.	European journal of ophthalmology	13	3	apr	276--280	2003																PURPOSE: Patients with central scotoma often develop eccentric fixation on a preferred retinal locus (PRL). Identifying the PRL is one of the first steps in low vision rehabilitation training. We present our evaluation of a simple test designed to locate the eccentric fixation in eyes with central scotoma. METHODS: This was a prospective case series of consecutive patients with age-related macula…		Aged,Aged, 80 and over,Astigmatism,Diagnostic Techniques, Ophthalmological,Female,Fixation, Ocular,Humans,Macular Degeneration,Male,Middle Aged,Ophthalmoscopy,Prospective Studies,Scotoma,Vision Disparity,Visual Field Tests,complications,diagnosis,etiology
Dauty2003	Reproducibility of concentric and eccentric isokinetic strength of the shoulder rotators in normal subjects 40 to 55 years old	ISOKINETICS AND EXERCISE SCIENCE	11	2		95--100	2003																The purpose of this study was to define the test-retest reproducibility of concentric and eccentric isokinetic measurements of shoulder rotators. It was carried out at a 26 day +/-4 interval. Fourteen healthy volunteer subjects (7 men and 7 women), aged between 40 and 55 years (47.5 +/- 5.6 years), were included. Evaluation was carried out with a Cybex Norm dynamometer and the reliability was cal…
Deighan2003	Reliability of isokinetic concentric and eccentric knee and elbow extension and flexion in 9/10 year old boys	ISOKINETICS AND EXERCISE SCIENCE	11	2		109--115	2003																The aim of this study was to determine the reliability of measures of concentric and eccentric extension and flexion peak moment of the knee and elbow of prepubertal boys. Twenty boys volunteered for the study. Ten performed the knee test and ten performed the elbow test. All subjects were permitted a separate day familiarisation session and were later tested on two separate occasions, exactly I …
Delbaere2003	Age-related changes in concentric and eccentric muscle strength in the lower and upper extremity: A cross-sectional study	ISOKINETICS AND EXERCISE SCIENCE	11	3		145--151	2003																Objective: To determine the influence of ageing on lean muscle area and isometric and concentric and eccentric muscle strength in the upper and lower extremity in a cross-sectional study design. Subjects and methods: Lean muscle area and maximal muscle strength (isometric and isokinetic, 60degrees and 120degrees/s) of both upper and lower extremity were assessed of 45 men and 56 women (20 to 89 y…
DesteCroix2003	Assessment and interpretation of isokinetic muscle strength during growth and maturation	SPORTS MEDICINE	33	10		727--743	2003																The majority of strength studies examining changes during growth and maturation have investigated isometric actions, which tell us little about the muscle under dynamic conditions. There are numerous methodological issues in the isokinetic testing of paediatric populations that require,further investigation. However, several studies have indicated that children can be reliably assessed isokinetic…
Dore2003	Measurement error in short-term power testing in young people	JOURNAL OF SPORTS SCIENCES	21	2		135--142	2003																The aim of this study was to examine the consistency or reproducibility of measuring cycling peak power in children and adults. Twenty-seven pre-pubertal girls and boys and 27 female and male physical education students (age 9.8+/-0.5 and 24.4+/-4.3 years, respectively; mean+/-s) participated in the study. All participants performed five tests over 15 days and underwent a habituation session befo…
Dover2003	Reliability of joint position sense and force-reproduction measures during internal and external rotation of the shoulder	JOURNAL OF ATHLETIC TRAINING	38	4		304--310	2003																Objective: To determine the reliability of 2 common measures of proprioception. Design and Setting: Joint position sense (JPS) and force reproduction (FR) were measured in the dominant shoulder using internal- rotation (IR) and externalrotation (ER) target angles on 2 consecutive days. Subjects: Thirty-one healthy subjects (age 22.0 +/- 2.8 years, height = 171.8 +/- 9.2 cm, mass = 69.5 +/- 15.9 k…
Durand2003	Hormonal responses from concentric and eccentric muscle contractions	MEDICINE AND SCIENCE IN SPORTS AND EXERCISE	35	6		937--943	2003																Intense resistance exercise can acutely increase testosterone (T), free testosterone (FT), and growth hormone (GH) concentrations. but there are few investigations concerning acute endocrine responses to concentric (CON) and eccentric (ECC) contractile actions. Purpose: The purpose of the study was to compare acute anabolic hormonal responses to bouts of dynamic CON and ECC contractions from mult…
Dvir2003	Trunk extension effort in patients with chronic low back dysfunction.	Spine	28	7	apr	685--692	2003																STUDY DESIGN: Single-session measurement was performed. OBJECTIVE: To measure trunk extension strength and assess trunk extension effort in patients with chronic low back dysfunction using a novel test protocol and the DEC parameter. SUMMARY OF BACKGROUND DATA: In normal subjects, the DEC parameter effectively and reproducibly differentiates between maximal effort and feigned weakness of the trun…		Abdomen,Adult,Aged,Back Injuries,Biomechanical Phenomena,Chronic Disease,Exercise Test,Female,Humans,Isometric Contraction,Low Back Pain,Male,Middle Aged,Muscle Contraction,Muscle, Skeletal,Physical Exertion,Range of Motion, Articular,Stress, Mechanical,Thorax,physiology,physiopathology
Fahlstrom2003	Martin; Jonsson	Per; Lorentzon	Ronny; Alfredson	H{\aa}kan"	Chronic Achilles tendon pain treated with eccentric calf-muscle training.	Knee surgery, sports traumatology, arthroscopy : official journal of the ESSKA	11	5	sep	327--333	2003																Injuries involving the Achilles tendon and manifested as chronic tendon pain are common, especially among recreational athletes. In a pilot study on a small group of patients with chronic painful mid-portion Achilles tendinosis, eccentric calf-muscle training was shown to give good clinical results. The aim of this prospective study was to investigate if the previously achieved good clinical resu…
Farthing2003	The effects of eccentric and concentric training at different velocities on muscle hypertrophy	EUROPEAN JOURNAL OF APPLIED PHYSIOLOGY	89	6		578--586	2003																The purpose of this study was to examine the effect of isokinetic eccentric (ECC) and concentric (CON) training at two velocities [fast, 180degrees s(-1) (3.14 rad s(-1)) and slow, 30degrees s(-1) (0.52 rad s(-1))] on muscle hypertrophy. Twenty-four untrained volunteers (age 1836 years) participated in fast- (n = 13) or slow- (n = 11) velocity training, where they trained one arm eccentrically fo…
Frontera2003	Strength training in older women: Early and late changes in whole muscle and single cells	MUSCLE & NERVE	28	5		601--608	2003																In order to examine the relative contribution of neural- and muscle-based adaptation to strength training, we studied early (2 weeks) and later (12 weeks) effects of strength training on muscle size and strength and type I single-fiber size and contractility in 14 elderly women (aged 68-79 years) and seven young controls. Older subjects were randomized to training (n = 7) or control (n = 7) group…
Futter2003	Do pre-operative abdominal exercises prevent post-operative donor site complications for women undergoing DIEP flap breast reconstruction? A two-centre, prospective randomised controlled trial.	British journal of plastic surgery	56	7	oct	674--683	2003																The deep inferior epigastric perforator (DIEP) flap is the gold standard for breast reconstruction using abdominal tissue. Unlike the transverse rectus abdominis myocutaneous (TRAM) flap, no rectus abdominis muscle is removed with the flap, but intra-muscular scarring can still cause post-operative complications. Strong abdominal muscles have been advocated as a prerequisite for surgery, but with…		Abdominal Muscles,Adult,Chi-Square Distribution,Cicatrix,Exercise,Female,Follow-Up Studies,Humans,Isometric Contraction,Length of Stay,Mammaplasty,Middle Aged,Muscle Tonus,Pain, Postoperative,Postoperative Complications,Prospective Studies,Surgical Flaps,methods,pathology,physiology,prevention & control,surgery
Galie2003	Effects of the oral endothelin-receptor antagonist bosentan on echocardiographic and doppler measures in patients with pulmonary arterial hypertension.	Journal of the American College of Cardiology	41	8	apr	1380--1386	2003																OBJECTIVES: The purpose of this study was to investigate the effects of bosentan (125 or 250 mg twice daily) on echocardiographic and Doppler variables in 85 patients with World Health Organization class III or IV pulmonary arterial hypertension (PAH). BACKGROUND: Bosentan, an orally active dual endothelin-receptor antagonist, improves symptoms, exercise capacity, and hemodynamics in patients wit…		Administration, Oral,Adult,Aged,Antihypertensive Agents,Bosentan,Echocardiography, Doppler,Female,Humans,Hypertension, Pulmonary,Hypertrophy, Left Ventricular,Hypertrophy, Right Ventricular,Male,Middle Aged,Sulfonamides,Ventricular Function, Left,Ventricular Function, Right,administration & dosage,chemically induced,diagnostic imaging,drug effects,drug therapy,pathology,pharmacology,physiopatholo…
Gerodimos2003	Isokinetic peak torque and hamstring/quadriceps ratios in young basketball players. Effects of age, velocity, and contraction mode.	The Journal of sports medicine and physical fitness	43	4	dec	444--452	2003																AIM: The purpose of this study was to provide an extensive isokinetic profile, including peak torque and functional" and "conventional" muscle group ratios	of basketball players throughout the developmental years 12-17. Furthermore	we investigated the effects of age and angular velocity on peak torque and reciprocal muscle group ratios	and observed the force-velocity pattern. METHODS: Basketball players (n=180) 12 to 17 years. were divided according to their age in 6 equal (n=30) groups aged 12	13
Gleeson2003	Effects of prior concentric training on eccentric exercise induced muscle damage	BRITISH JOURNAL OF SPORTS MEDICINE	37	2		119--125	2003																Background: Exercise induced muscle damage (EIMD) from strenuous unaccustomed eccentric exercise is well documented. So too is the observation that a prior bout of eccentric exercise reduces the severity of symptoms of EIMD. This has been attributed to an increase in sarcomeres in series. Recent studies have suggested that prior concentric training increases the susceptibility of muscle to EIMD f…
Gur2003	Hakan; Cakin	Nilg{\"{u}}n; Gur	H.; Cakin	Nilg{\"{u}}n"	Muscle mass, isokinetic torque, and functional capacity in women with osteoarthritis of the knee	ARCHIVES OF PHYSICAL MEDICINE AND REHABILITATION	84	10	oct	1534--1541	2003																Objectives: To investigate the relations between cross-sectional area and concentric and eccentric torques in the quadriceps and hamstring muscles and to determine how functional capacity relates to pain, muscle mass, and concentric and eccentric knee torques in women who have bilateral osteoarthritis (OA) of the knee. Design: Randomized, descriptive study. Setting: A university exercise physiolo…
Hilliard-Robertson2003	Strength gains following different combined concentric and eccentric exercise regimens.	Aviation, space, and environmental medicine	74	4	apr	342--347	2003																BACKGROUND: Loss of muscle strength and cross-sectional area is a well-recognized consequence of spaceflight. Existing countermeasures have not been fully effective in preventing muscle weakness and atrophy in microgravity. Resistance exercise programs that consist of both eccentric and concentric actions have resulted in strength and muscle mass gains in ground-based studies. HYPOTHESES: 1) A co…		Adult,Exercise,Female,Humans,Male,Middle Aged,Muscle Weakness,Muscle, Skeletal,Muscular Atrophy,Prospective Studies,physiology,prevention & control
Hortobagyi2003	The positives of negatives: Clinical implications of eccentric resistance exercise in old adults	JOURNALS OF GERONTOLOGY SERIES A-BIOLOGICAL SCIENCES AND MEDICAL SCIENCES	58	5	may	417--418	2003																		,80 and over,Aged,Exercise,Female,Humans,Male,Muscle,Skeletal,physiology
Hruda2003	Training for muscle power in older adults: effects on functional abilities.	Canadian journal of applied physiology = Revue canadienne de physiologie appliquee	28	2	apr	178--189	2003																The purpose of this study was to determine the influence of simple, progressive lower body exercise training, focusing on strength and power, on functional abilities in frail older adults. Twenty-five residents of a long-term care facility (75-94 yrs) participated in this randomized controlled trial of 10-wks duration. The exercise group (Ex, n = 18) underwent simple, progressive lower body resis…		Activities of Daily Living,Aged,Aged, 80 and over,Exercise Therapy,Female,Frail Elderly,Humans,Leg,Male,Muscle, Skeletal,Physical Fitness,Walking,physiology
Koh2003	Passive stretches protect skeletal muscle of adult and old mice from lengthening contraction-induced injury	JOURNALS OF GERONTOLOGY SERIES A-BIOLOGICAL SCIENCES AND MEDICAL SCIENCES	58	7		592--597	2003																We tested the hypothesis that a single bout of training with passive stretches or isometric contractions protects the extensor digitorum longus muscle in old mice from contraction-induced injury. Lengthening contractions produced similar decreases in force (similar to70%-80%) and numbers of overtly injured fibers (similar to15%-20%) in adult and old mice, but twofold greater inflammatory cell acc…
Krishnan2003	Impaired substrate oxidation in healthy elderly men after eccentric exercise.	Journal of applied physiology (Bethesda, Md. : 1985)	94	2	feb	716--723	2003																The metabolic response to eccentric exercise in healthy older adults is unknown. Therefore, substrate metabolism was examined in the basal state and after sustained hyperglycemia (180 min, 10 mM) in eight healthy, sedentary older [66 +/- 2 yr; body mass index (BMI) of 25.5 +/- 1.2 kg/m] and nine younger (23 +/- 1 yr; BMI of 23.6 +/- 1.7 kg/m) men, under control conditions and 48 h after eccentric…		Abdomen,Adipose Tissue,Adult,Aged,Aging,Carbohydrate Metabolism,Dose-Response Relationship, Drug,Exercise,Glucose,Humans,Hyperglycemia,Lipid Metabolism,Male,Middle Aged,Oxidation-Reduction,Pulmonary Gas Exchange,Reference Values,administration & dosage,chemically induced,metabolism,pathology,physiology
LaStayo2003	The positive effects of negative work: increased muscle strength and decreased fall risk in a frail elderly population.	The journals of gerontology. Series A, Biological sciences and medical sciences	58	5	may	M419--24	2003																BACKGROUND: The objective of this study was to determine if a chronic eccentric training intervention, i.e., negative work, could limit or even reverse sarcopenia and its related impairments and functional limitations. Is high-force eccentric training tolerable by elderly people and will it result in improved muscle size, strength, balance, and fall risk? METHODS: 21 frail elderly subjects (mean …	balance	stair descending abilities	and fall risk were assessed prior to and following this intervention. RESULTS: All ECC subjects who started the negative work intervention completed the study and reported the training to be relatively effortless; they experienced minimal and transient muscle soreness. Both groups experienced a significant increase in muscle fiber cross-sectional area (ECC=60%	TRAD=41%). Only the ECC group experienced significant improvements in strength (60%)
Leferink2003	Functional outcome in patients with thoracolumbar burst fractures treated with dorsal instrumentation and transpedicular cancellous bone grafting	EUROPEAN SPINE JOURNAL	12	3		261--267	2003																The aim of the study was to develop an insight into the impairments in spinal fracture patients, operatively treated with an internal fixator, and also into their ability to participate in daily living, return to work and quality of life as defined by the World Health Organization. Nineteen patients operated for a type A fracture of the thoracolumbar spine (T9-L4) between 1993 and 1998 in the Uni…
Mayer2003	Strength training in elderly and chronic diseases	DEUTSCHE ZEITSCHRIFT FUR SPORTMEDIZIN	54	3		88--94	2003																Epidemiological data show a marked increase in the proportion of elderly and incapacitated people in the general population. For this reason, along with the prevention of cardiovascular diseases, maintenance or recovery of performance capacity of the muscular system is of central importance, particularly with respect to self-reliance and independence in daily living. Yet the application of streng…
McLester2003	A series of studies - A practical protocol for testing muscular endurance recovery	JOURNAL OF STRENGTH AND CONDITIONING RESEARCH	17	2		259--273	2003																The purpose of this series of studies was to use a practical measure to examine the course of muscular endurance recovery after 3 sets to failure in 10 men (ages 18 to 30 years) and then compare those results with 10 men (ages 18 to 30 years) who performed 7 sets and 10 older men (ages 50 to 65 years) who performed 3 sets. Recovery as indicated by number of repetitions performed was observed at 2…
Meyer2003	Eccentric exercise in coronary patients: central hemodynamic and metabolic responses.	Medicine and science in sports and exercise	35	7	jul	1076--1082	2003																PURPOSE: With lengthening (eccentric) muscle contractions, the magnitude of locomotor-muscle mass and strength increase has been demonstrated to be greater compared with shortening (concentric) muscle contractions. In healthy subjects, energy demand and heart rate responses with eccentric exercise are small relative to the amount of muscle force produced. Thus, eccentric exercise may be an attrac…		Adult,Aged,Coronary Artery Disease,Exercise Therapy,Female,Heart Rate,Hemodynamics,Humans,Lactic Acid,Male,Middle Aged,Muscle Contraction,Muscle, Skeletal,Oxygen Consumption,Ventricular Dysfunction, Left,Weight Lifting,blood,physiology,rehabilitation
Nilsson2003	Patients with AMD and a large absolute central scotoma can be trained successfully to use eccentric viewing, as demonstrated in a scanning laser ophthalmoscope.	Vision research	43	16	jul	1777--1787	2003																Twenty patients with age-related macular degeneration, an absolute central scotoma and a mean visual acuity of 0.04 (20/475) were studied. A scanning laser ophthalmoscope (SLO) was used for microperimetry and determination of preferred retinal locus, often located to the left of the retinal lesion (corresponding to a location to the left of the visual field scotoma), which is considered unfavorab…		Aged,Female,Humans,Macular Degeneration,Male,Middle Aged,Ophthalmoscopes,Reading,Retina,Scotoma,Vision, Low,Visual Acuity,complications,physiology,rehabilitation
Peng2003	Changes and significance of subtype function of beta-adrenoreceptors in left ventricular remodeling of hypertension	JAPANESE HEART JOURNAL	44	6	nov	933--942	2003																Changes in the density of myocardium and blood lymphocyte beta-adrenoceptors (beta-AR) in left ventricular (LV) geometry have been found in patients with essential hypertension (EH). However, it is not known whether intrinsic beta-AR subtype function changes during left ventricular remodeling of hypertension. The purpose of this study was to further investigate the changes and clinical significan…		,Adrenergic,Adult,Aged,Doppler,Echocardiography,Heart Rate,Humans,Hypertension,Left,Male,Middle Aged,Myocardium,Receptors,Stroke Volume,Ventricular Function,Ventricular Remodeling,beta,diagnostic imaging,metabolism,physiology,physiopathology
Phillips2003	A dietary supplement attenuates IL-6 and CRP after eccentric exercise in untrained males.	Medicine and science in sports and exercise	35	12	dec	2032--2037	2003																PURPOSE: This study investigated the effects of a dietary supplement on exercise-induced markers of cell damage and the inflammatory mediators C-reactive protein (CRP) and interleukin-6 (IL-6). METHODS: The supplement contained mixed tocopherols, flavonoids, and docosahexaenoate. Forty healthy, nonsmoking, untrained males (aged 18-35 yr) were randomly assigned to receive either the supplement (N …		Adult,C-Reactive Protein,Dietary Supplements,Docosahexaenoic Acids,Double-Blind Method,Exercise,Flavonoids,Humans,Inflammation,Interleukin-6,Male,Muscle, Skeletal,Pain Measurement,Placebos,Range of Motion, Articular,Tocopherols,blood,drug effects,pathology,pharmacology,physiology,prevention & control
Poulis2003	Functional and isokinetic assessment of hands with early stage of Rheumatoid Arthritis	ISOKINETICS AND EXERCISE SCIENCE	11	4		225--230	2003																The objective of this study was twofold: to explore the effect of RA on hand grip strength at early stage of diagnosed RA and to support the application of isokinetic evaluation in the assessment of RA. Twenty women, age 48 +/- 5 years, participated in this study: 10 with early stage RA and 10 healthy controls. The evaluation tests were included the Health Assessment Questionnaire (HAQ), Moberg p…
Rahnama2003	Muscle fatigue induced by exercise simulating the work rate of competitive soccer	JOURNAL OF SPORTS SCIENCES	21	11		933--942	2003																Fatigue represents a reduction in the capability of muscle to generate force. The aim of the present study was to establish the effects of exercise that simulates the work rate of competitive soccer players on the strength of the knee extensors and knee flexors. Thirteen amateur soccer players (age 23.3+/-3.9 years, height 1.78+/-0.05 m, body mass 74.8+/-3.6 kg; mean+/- s ) were tested during the…
Rooyackers2003	Eccentric exercise training in patients with chronic obstructive pulmonary disease.	International journal of rehabilitation research. Internationale Zeitschrift fur Rehabilitationsforschung. Revue internationale de recherches de readaptation	26	1	mar	47--49	2003																The oxygen cost of eccentric exercise is lower than that of concentric exercise at similar work-loads. In this study, the response to eccentric cycle exercise training (EET) in addition to general exercise training (GET) on exercise performance and quality of life was investigated in 24 patients with severe chronic obstructive pulmonary disease (COPD). All patients had a normal resting PaO2 and a…		Exercise Therapy,Female,Humans,Male,Middle Aged,Pulmonary Disease, Chronic Obstructive,Statistics, Nonparametric,methods,rehabilitation
Sacheck2003	Effect of vitamin E and eccentric exercise on selected biomarkers of oxidative stress in young and elderly men.	Free radical biology & medicine	34	12	jun	1575--1588	2003																Muscle damage resulting from eccentric exercise provides a useful model of oxyradical-induced injury and can be used to examine age-related responses to oxidative stress. Sixteen young (26.4 +/- 3.3 years) and 16 older (71.1 +/- 4.0 years) healthy men were randomly assigned to 1000 IU/d vitamin E or placebo for 12 weeks and ran downhill for 45 min at 75% VO(2)max, once before and following supple…		8-Hydroxy-2'-Deoxyguanosine,Adult,Aged,Aged, 80 and over,Aging,Antioxidants,Biomarkers,Creatine Kinase,Deoxyguanosine,Dietary Supplements,Double-Blind Method,Exercise,F2-Isoprostanes,Humans,Lipid Peroxidation,Male,Malondialdehyde,Muscle, Skeletal,Oxidation-Reduction,Oxidative Stress,Vitamin E,analogs & derivatives,analysis,blood,drug effects,metabolism,pharmacology,physiology
Sayers2003	Short-term immobilization after eccentric exercise. Part II: Creatine kinase and myoglobin	MEDICINE AND SCIENCE IN SPORTS AND EXERCISE	35	5		762--768	2003																Purpose: Although creatine kinase (CK) is commonly used as a marker of muscle damage, there is large variability in the response to exercise. We previously found short-term immobilization blunted the rise in plasma CK after eccentric exercise, suggesting subsequent movement of damaged muscle may contribute to variability. We hypothesized that immobilization decreases lymphatic transport of CK fro…
Sayers2003a	Short-term immobilization after eccentric exercise. Part I: Contractile properties	MEDICINE AND SCIENCE IN SPORTS AND EXERCISE	35	5		753--761	2003																Purpose: The purpose of this study was to examine the compound muscle action potential (M-wave) and evoked contractile properties of immobilized muscle after high-force eccentric exercise. We believed that changes in these variables would contribute to the enhanced recovery of maximal voluntary force observed after short-term immobilization of damaged muscle. We hypothesized that immobilization a…
Scott2003	Effects of delayed onset muscle soreness on selected physiological responses to submaximal running	JOURNAL OF STRENGTH AND CONDITIONING RESEARCH	17	4		652--658	2003																This study examined the effects of delayed-onset muscle soreness (DOMS) on selected physiological responses to submaximal exercise. Seven male and four female subjects (Ss) aged 21-37 years completed two submaximal running sessions at an individualized pace corresponding to a blood lactate concentration (bLa) of approximately 2.5 mmol x L-1. Following the first session (T1), Ss performed a series…
Sommerhalder2003	Evelyne; Bagnoud	Marc; Leonards	Ute; Safran	Avinoam B.; Pelizzone	Marco"	Simulation of artificial vision: I. Eccentric reading of isolated words, and perceptual learning.	Vision research	43	3	feb	269--283	2003
Takarada2003	Evaluation of muscle damage after a rugby match with special reference to tackle plays	BRITISH JOURNAL OF SPORTS MEDICINE	37	5		416--419	2003																Objective: To investigate blood indices of muscle damage after a competitive rugby match. Methods: Fifteen elite amateur rugby players volunteered to participate (mean (SE) age 26.6 (0.7) years, height 179.8 (1.0) cm, weight 87.4 (2.2) kg, and VO(2)MAX 58.5 (1.2) ml/kg/min). The study was conducted after two competitive matches during the 1999-2000 season. Plasma concentrations of lactate, potass…
Tokmakidis2003	The effects of ibuprofen on delayed muscle soreness and muscular performance after eccentric exercise	JOURNAL OF STRENGTH AND CONDITIONING RESEARCH	17	1		53--59	2003																The purpose of this study was to examine the effects of ibuprofen on delayed onset muscle soreness (DOMS), indirect markers of muscle damage and muscular performance. Nineteen subjects (their mean [+/- SD] age, height, and weight was 24.6 +/- 3.9 years, 176.2 +/- 11.1 cm, 77.3 +/- 18.7 kg) performed the eccentric leg curl exercise to induce muscle soreness in the hamstrings. Nine subjects took an…
Yanagisawa2003	Evaluations of cooling exercised muscle with MR imaging and P-31 MR spectroscopy	MEDICINE AND SCIENCE IN SPORTS AND EXERCISE	35	9		1517--1523	2003																YANAGISAWA, O., M. NIITSU, H. TAKAHASHI, K. GOTO, and Y. ITA1 Evaluations of Cooling Exercised Muscle with MR Imaging and P-31 MR Spectroscopy. Med. Sci. Sports Exerc., Vol. 35. No. 9, pp. 1517-1523, 2003. Purpose: To investigate the effects of cooling human skeletal muscle after strenuous exercise Using P-31 MR spectroscopy and MR imaging. Methods: 14 male subjects (mean age +/- SD. 23.8 +/- 2.3…
Yilmaz2003	Banu"	Efficacy of dynamic lumbar stabilization exercise in lumbar microdiscectomy.	Journal of rehabilitation medicine	35	4	jul	163--167	2003																OBJECTIVE: The aim of this study was to determine the efficacy of dynamic lumbar stabilization exercises in patients with lumbar microdiscectomy. DESIGN: A prospective, randomized, controlled study. SUBJECTS: Forty-two patients who were diagnosed as having lumbar disc herniation and had been operated on using the microdiscectomy method were divided randomly into 3 groups. METHODS: Dynamic lumbar …		Adult,Diskectomy,Exercise Therapy,Female,Humans,Intervertebral Disc Displacement,Lumbar Vertebrae,Male,Middle Aged,Prospective Studies,rehabilitation,surgery
Alkner2004	Per A."	Knee extensor and plantar flexor muscle size and function following 90 days of bed rest with or without resistance exercise.	European journal of applied physiology	93	3	dec	294--305	2004																Skeletal muscle atrophy and strength loss induced by short-term simulated spaceflight are offset or attenuated by resistance exercise (RE). This study compared the effects of plantar flexor and knee extensor RE on muscle size and function in 17 healthy men (aged 26-41years) subjected to 90 days 6 degrees head-down-tilt bed rest with (BRE; n = 8) or without (BR; n = 9) RE. The RE program consisted…		Adult,Exercise,Humans,Leg,Male,Muscle, Skeletal,Weightlessness Simulation,anatomy & histology,physiology
Baudry2004	Postactivation potentiation in human muscle is not related to the type of maximal conditioning contraction.	Muscle & nerve	30	3	sep	328--336	2004																The mechanical performance of a muscle can be enhanced by preceding contractile activity, such as occurs with postactivation potentiation. To investigate whether the type of contraction influences the extent of potentiation, the effects of 6-s maximal isometric (ISO), concentric (CON), and eccentric (ECC) maximal voluntary contractions (MVC) on the muscle twitch were compared in the tibialis ante…		Action Potentials,Adult,Analysis of Variance,Electric Stimulation,Female,Humans,Male,Middle Aged,Muscle Contraction,Muscle, Skeletal,methods,physiology
Beck2004	Mechanomyographic amplitude and mean power frequency versus torque relationships during isokinetic and isometric muscle actions of the biceps brachii	JOURNAL OF ELECTROMYOGRAPHY AND KINESIOLOGY	14	5		555--564	2004																The purpose of this investigation was to determine the mechanomyographic (MMG) amplitude and mean power frequency (MPF) versus torque (or force) relationships during isokinetic and isometric muscle actions of the biceps brachii. Ten adults (mean +/- SD age = 21.6 +/- 1.7 years) performed submaximal to maximal isokinetic and isometric muscle actions of the dominant forearm flexors. Following deter…
Beck2004a	Mechanomyographic and electromyographic time and frequency domain responses during submaximal to maximal isokinetic muscle actions of the biceps brachii	EUROPEAN JOURNAL OF APPLIED PHYSIOLOGY	92	3		352--359	2004																The purpose of this investigation was to determine the mechanomyographic (MMG) and electromyographic (EMG) amplitude and mean power frequency (MPF) versus torque relationships during isokinetic muscle actions of the biceps brachii. Twelve adults [mean (SD) age, 22.2 (2.7) years] performed submaximal to maximal isokinetic muscle actions of the dominant forearm flexors. Following determination of i…
Boyle2004	The effects of yoga training and a single bout of yoga on delayed onset muscle soreness in the lower extremity.	Journal of strength and conditioning research	18	4	nov	723--729	2004																The purpose of this study was to determine the effects of yoga training and a single bout of yoga on the intensity of delayed onset muscle soreness (DOMS). 24 yoga-trained (YT; n = 12) and non-yoga-trained (CON; n = 12), matched women volunteers were administered a DOMS-inducing bench-stepping exercise. Muscle soreness was assessed at baseline, 24, 48, 72, 96, and 120 hours after bench-stepping u…		Adult,Analysis of Variance,Female,Humans,Lower Extremity,Middle Aged,Muscles,Pain,Pain Measurement,Time Factors,Yoga,etiology,physiology,physiopathology,prevention & control
BrockSymons2004	Effects of deep heat as a preventative mechanism on delayed onset muscle soreness.	Journal of strength and conditioning research	18	1	feb	155--161	2004																The effects of increased muscle temperature via continuous ultrasound prior to a maximal bout of eccentric exercise were investigated on the symptoms of delayed onset muscle soreness (DOMS) of the elbow flexors. Perceived muscle soreness, upper arm circumferences, range of motion (ROM), and isometric and isokinetic strength were measured over 7 days on 14 college-aged men (n = 6) and women (n = 8…		Adult,Analysis of Variance,Elbow Joint,Exercise,Female,Humans,Male,Muscle Contraction,Muscular Diseases,Pain,Range of Motion, Articular,Ultrasonic Therapy,etiology,prevention & control
Brostrom2004	Plantar- and dorsiflexor strength in prepubertal girls with juvenile idiopathic arthritis	ARCHIVES OF PHYSICAL MEDICINE AND REHABILITATION	85	3rd International Conference on Strength Training		1224--1230	2004																Objective: To compare lower-leg strength of young girls with polyarticular juvenile idiopathic arthritis (JIA) with that of healthy, age-matched controls. Design: Isometric and isokinetic strength tests of the plantar- and dorsiflexors. All strength measures were made at an ankle angle of 90degrees. Isokinetic plantar- and dorsiflexor measures were made at 15degrees/s during shortening (concentri…
Caserotti2004	Age-related changes in muscle power generation during concentric-alone and coupled eccentric-concentric muscle contractions and performance of functional motor tasks	JOURNAL OF AGING AND PHYSICAL ACTIVITY	12	3		326--328	2004
Coburn2004	Mechanomyographic responses of the vastus medialis to isometric and eccentric muscle actions	MEDICINE AND SCIENCE IN SPORTS AND EXERCISE	36	11		1916--1922	2004																Purpose: The mechanomyographic (MMG) signal may be used to examine the motor control strategies used to modulate torque during various types of muscle actions. Therefore, the purpose of this study was to examine the MMG amplitude and mean power frequency (MPF) versus torque relationships during isometric and eccentric isokinetic muscle actions. Methods: Eleven adults (mean age +/- SD = 20.8 +/- 1…
Conrady2004	Prevalence and determinants of left ventricular hypertrophy and remodelling patterns in hypertensive patients: the St. Petersburg study.	Blood pressure	13	2		101--109	2004																OBJECTIVE: The primary aim of the present study was to determine the prevalence of left ventricular hypertrophy (LVH) in hypertensive patients with the use of different threshold values and also to assess the distribution of left ventricular (LV) geometry patterns verified by two different methods of relative wall thickness (RWT) calculation. The secondary aim was to evaluate the impact of differ…	to our opinion	can overestimate the prevalence of structural LV remodelling	while implementation of sex-specific criteria for the definition of LVH increases the sensitivity of the method. In any way	eccentric LVH is as common for hypertension as a concentric LVH
Cordova2004	Protection against muscle damage in competitive sports players: the effect of the immunomodulator AM3	JOURNAL OF SPORTS SCIENCES	22	9		827--833	2004																Strenuous physical exercise of the limb muscles commonly results in damage, especially when that exercise is intense, prolonged and includes eccentric contractions. Many factors contribute to exercise-induced muscle injury and the mechanism is likely to differ with the type of exercise. Competitive sports players are highly susceptible to this type of injury. AM3 is an orally administered immunom…
Dobridge2004	The effects of estrogen on indices of skeletal muscle tissue damage after eccentric exercise in postmenopausal women.	Fiziologiia cheloveka	30	4		98--102	2004																This study examined if estrogen (E) usage (in the form of hormone replacement therapy [HRT]) has a protective effect on skeletal muscle damage in postmenopausal women. Nine postmenopausal women (age 55.2 +/- 9.9 [mean +/- SD]) performed two exercise sessions at 70% of their maximal heart rate on HRT (E-HI) and without HRT (E-LO; following a 28-45 day HRT washout). All subjects followed a conditio…		Creatine Kinase,Estrogen Replacement Therapy,Estrogens,Exercise,Female,Heart Rate,Humans,Middle Aged,Muscle Contraction,Muscle, Skeletal,Pain,Postmenopause,administration & dosage,blood,drug effects,etiology,methods,physiology,physiopathology,therapeutic use
Dufour2004	Eccentric cycle exercise: Training application of specific circulatory adjustments	MEDICINE AND SCIENCE IN SPORTS AND EXERCISE	36	11		1900--1906	2004																Purpose: Despite identical oxygen uptake (VO2), enhanced heart rate (HR) and cardiac output (0) responses have been reported in eccentric (ECC) versus concentric (CON) cycle exercise. The aim of this study was to describe the specific circulatory adjustments (HR and stroke volume (SV)) to incremental ECC cycle exercise in order to: 1) determine the HR values leading to identical VO2 in ECC and CO…
Evans2004	Protein nutrition, exercise and aging.	Journal of the American College of Nutrition	23	6 Suppl	dec	601S--609S	2004																Aging is associated with remarkable changes in body composition. Loss of skeletal muscle, a process called sarcopenia, is a prominent feature of these changes. In addition, gains in total body fat and visceral fat content continue into late life. The cause of sarcopenia is likely a result of a number of changes that also occur with aging. These include reduced levels of physical activity, changin…		Aging,Body Composition,Dietary Proteins,Exercise,Female,Humans,Insulin,Male,Muscle, Skeletal,Nutrition Policy,Nutritional Requirements,Physical Endurance,administration & dosage,metabolism,physiology
Grobler2004	Skeletal muscle pathology in endurance athletes with acquired training intolerance	BRITISH JOURNAL OF SPORTS MEDICINE	38	6		697--703	2004																Background: It is well established that prolonged, exhaustive endurance exercise is capable of inducing skeletal muscle damage and temporary impairment of muscle function. Although skeletal muscle has a remarkable capacity for repair and adaptation, this may be limited, ultimately resulting in an accumulation of chronic skeletal muscle pathology. Case studies have alluded to an association betwee…
Hamada2004	Senescence of human skeletal muscle impairs the local inflammatory cytokine response to acute eccentric exercise	FASEB JOURNAL	18	14		264--+	2004																The impact of aging on the cytokine response of human skeletal muscle to exercise-induced injury remains poorly understood. We enrolled physically active, young (23-35 years old, n = 15) and old (66-78 years old, n = 15) men to perform 45 min of downhill running (16% descent) at 75% VO2max. Biopsies of vastus lateralis were obtained 24 h before and 72 h after acute eccentric exercise. Transcripts…
Harrison2004	Effects of muscle damage on stretch-shortening cycle function and muscle stiffness control.	Journal of strength and conditioning research	18	4	nov	771--776	2004																This experiment examined the effect of eccentric contraction-induced muscle damage on the stretch-shortening cycle and vertical leg spring stiffness during jumping activities. Ten moderately active male and female adult volunteers participated in this study (aged 23 +/- 2.3 years). Temporary muscle damage to the knee extensors was administered by a bout of eccentric contractions on an isokinetic …		Adolescent,Adult,Analysis of Variance,Female,Humans,Leg Injuries,Male,Muscle Contraction,Muscle, Skeletal,Stress, Mechanical,injuries,physiology,physiopathology
Hartzband2004	Posterolateral minimal incision for total hip replacement: technique and early results.	The Orthopedic clinics of North America	35	2	apr	119--129	2004																There presently exists in the arthroplasty community a new and heightened level of interest in minimally invasive techniques for total joint replacement. Several investigators have published their personal experience with differing techniques, all concluding that there are multiple advantages to this concept for total hip arthroplasty. The author's perception is that the advantages of minimally i…		Activities of Daily Living,Adult,Aged,Aged, 80 and over,Arthroplasty, Replacement, Hip,Female,Femur,Follow-Up Studies,Hip Joint,Humans,Length of Stay,Male,Middle Aged,Minimally Invasive Surgical Procedures,Physical Therapy Modalities,Postoperative Complications,Treatment Outcome,adverse effects,anatomy & histology,instrumentation,methods,surgery
Hassan2004	Assessing fixation stability in patients with age-related maculopathy pre and post eccentric viewing training	INVESTIGATIVE OPHTHALMOLOGY & VISUAL SCIENCE	45 MA - 5	Annual Meeting of the Association-for-Research-in-Vision-and-Ophthalmology		U654--U654	2004
Hayes2004	The relationships between local muscular endurance and kinematic changes during a run to exhaustion at vVo(2)max	JOURNAL OF STRENGTH AND CONDITIONING RESEARCH	18	4		898--903	2004																A recent study suggested that runners who maintain a stable running style are able to run for longer at v(V)over dotO(2)max velocity (vVo(2)max). This may be because of the capacity of various muscle groups to maintain their functions despite the onset of fatigue. The purpose of this study was to examine the relationship between local muscular endurance of both the hip and knee extensor and flexo…
Hortobagyi2004	Aberrations in the control of quadriceps muscle force in patients with knee osteoarthritis	ARTHRITIS & RHEUMATISM-ARTHRITIS CARE & RESEARCH	51	4	aug	562--569	2004																Objective. To characterize the distribution of error in knee joint proprioception, quadriceps force accuracy and steadiness, and muscle strength in patients with knee osteoarthritis (OA). Special attention was paid to eccentric strength. Methods. We compared knee OA patients (n = 20: 15 women, 5 men) with age- and sex-matched, symptom-free adults. Knee pain and mobility were assessed with standar…		,Adult,Aged,Female,Humans,Knee,Male,Middle Aged,Motor Activity,Muscle,Muscle Contraction,Osteoarthritis,Pain,Proprioception,Skeletal,Thigh,physiopathology,rehabilitation
Huggett2004	Comparison of heart-rate and blood-pressure increases during isokinetic eccentric versus isometric exercise in older adults.	Journal of aging and physical activity	12	2	apr	157--169	2004																The authors compared heart-rate and blood-pressure responses to typical isometric (ISO) and isokinetic (90 degrees /s) eccentric (ECC) resistance-training protocols in older adults. Twenty healthy older adults (74 +/- 5 years old) performed randomly ordered ISO and isokinetic ECC exercise (3 sets of 10 repetitions) at a target intensity of 100 % of their peak ISO torque value. Heart rate and syst…		Aged,Blood Pressure,Exercise,Heart Rate,Humans,Isometric Contraction,physiology
Itoh2004	A proposed experimental model of myofascial trigger points in human muscle after slow eccentric exercise.	Acupuncture in medicine : journal of the British Medical Acupuncture Society	22	1	mar	2--3	2004																BACKGROUND: The purpose of this study was to develop an experimental model of myofascial trigger points to investigate their pathophysiology. METHODS: Fifteen healthy volunteers who gave informed consent underwent repetitive eccentric exercise of the third finger of one hand (0.1 Hz repetitions, three sets at five minute intervals) until exhaustion. Physical examination, pressure pain threshold, …		Adult,Electric Stimulation,Electromyography,Exercise,Fascia,Female,Fingers,Humans,Male,Middle Aged,Muscle Contraction,Muscle, Skeletal,Myofascial Pain Syndromes,Pain,Pain Threshold,Physical Exertion,Reference Values,Sensitivity and Specificity,Time Factors,etiology,innervation,methods,physiology,physiopathology
JimenezLopez-Guarch2004	[Efficacy of oral sildenafil as rescue therapy in patients with severe pulmonary arterial hypertension chronically treated with prostacyclin. Long-term results].	Revista espanola de cardiologia	57	10	oct	946--951	2004																INTRODUCTION AND OBJECTIVE: Prostacyclin therapy is an effective treatment for severe pulmonary hypertension. Sildenafil, a selective phosphodiesterase type 5 inhibitor, induces selective vasodilatation of the pulmonary vessels. A synergistic effect has been described for these two drugs. The aim of this study was to evaluate the efficacy and safety of sildenafil as rescue therapy in patients wit…		Administration, Oral,Adult,Antihypertensive Agents,Data Interpretation, Statistical,Drug Therapy, Combination,Echocardiography,Epoprostenol,Female,Follow-Up Studies,Humans,Hypertension, Pulmonary,Male,Middle Aged,Phosphodiesterase Inhibitors,Piperazines,Purines,Safety,Sildenafil Citrate,Sulfones,Time Factors,Treatment Outcome,Vasodilator Agents,administration & dosage,adverse effects,diagnosis,dr…
Kasikcioglu2004	Angiotensin-converting enzyme gene polymorphism, left ventricular remodeling, and exercise capacity in strength-trained athletes	HEART AND VESSELS	19	6		287--293	2004																The mechanisms that regulate the development of human physiological cardiac hypertrophy remain poorly understood. The renin-angiotensin system, which is modulated by genetic polymorphism, plays an important role in the regulation of vascular tone and myocardial hypertrophy. Although a few studies have analyzed the association of angiotensin-converting enzyme (ACE) polymorphism and left ventricula…
Kim2004	Exercise training and supplementation with carnitine and antioxidants increases carnitine stores, triglyceride utilization, and endurance in exercising rats	JOURNAL OF NUTRITIONAL SCIENCE AND VITAMINOLOGY	50	5		335--343	2004																This study evaluated the effects of supplementation of carnitine and antioxidants on lipids, carnitine concentrations, and exercise endurance time in both trained and untrained rats as compared to non-supplemented rats. Thirty-two male SD rats, age 7 wk were divided into four groups according to exercise training and modified AIN-76 diets: NTNS (non-trained non-supplemented), NTS (non-trained sup…
Kraemer2004	Ghrelin and other glucoregulatory hormone responses to eccentric and concentric muscle contractions	ENDOCRINE	24	Experimental Biology 2002 Annual Meeting		93--98	2004																Objective: Heavy resistance exercise increases growth hormone (GH) and blood glucose levels. Ghrelin is an endogenous ligand for the GH secretagory receptor that stimulates growth hormone release. Circulating ghrelin levels are suppressed by insulin and glucose. The study was conducted to determine effects of concentric (CON) and eccentric (ECC) muscle actions at the same absolute workload on cir…
Mackey2004	Skeletal muscle collagen content in humans after high-force eccentric contractions	JOURNAL OF APPLIED PHYSIOLOGY	97	1		197--203	2004																The purpose of this study was to investigate the effects of high-force eccentric muscle contractions on collagen remodeling and on circulating levels of matrix metalloproteinases (MMP) and tissue inhibitors of metalloproteinases (TIMP) in humans. Nine volunteers [5 men and 4 women, mean age 23 (SD 4) yr] each performed a bout of 100 maximum voluntary eccentric contractions of the knee extensors. …
Maitra2004	Upper extremity movement pattern of a common drinking task in well elderly women: A pilot study.	Occupational therapy international	11	2		67--81	2004																Retraining of the upper limb during neurological rehabilitation often involves preparatory therapeutic exercises of concentric and eccentric nature embedded in purposeful activity. However, empirical baseline studies are lacking to justify efficacy of such training. The purpose of this study was to determine the effect of concentric and eccentric exercises on upper extremity movement pattern in h…		Adult,Age Factors,Aged,Arm,Biomechanical Phenomena,Drinking,Female,Humans,Movement,Muscle, Skeletal,Pilot Projects,Reference Values,Rehabilitation,methods,physiology
Malm2004	Immune system alteration in response to two consecutive soccer games	ACTA PHYSIOLOGICA SCANDINAVICA	180	2		143--155	2004																Aim: Changes in leucocyte and monocyte subpopulations were investigated in 10 elite male soccer players aged 16-19 years. The purpose was to perform a descriptive study of immunological alterations in elite soccer players in response to two consecutive games separated by 20 h. It was hypothesized that in response to two games the players would show signs of short-term immunosuppression. Methods: …
Malm2004a	The Late Bertil; Sj{\"{o}}berg	Berit; Lenkei	Rodica; Renstr{\"{o}}m	Per; Lundberg	Ingrid E.; Ekblom	Bj{\"{o}}rn"	Leukocytes, cytokines, growth factors and hormones in human skeletal muscle and blood after uphill or downhill running.	The Journal of physiology	556	Pt 3	may		2004
McNeil2004	Torque loss induced by repetitive maximal eccentric contractions is marginally influenced by work-to-rest ratio.	European journal of applied physiology	91	5-6	may	579--585	2004																The influence of different work-to-rest (W:R) ratios during fatigue induced by maximal eccentric contractions is unknown. The present study sought to expand the understanding of the task-dependent nature of eccentric contractions, and the associated fatigue, during exercise and acute as well as extended recovery periods. Using a Biodex multi-joint dynamometer, the ankle dorsiflexors of eight men …		Adaptation, Physiological,Adult,Ankle Joint,Exercise,Humans,Isometric Contraction,Male,Muscle Fatigue,Muscle, Skeletal,Periodicity,Physical Endurance,Recovery of Function,Rest,Torque,physiology
Miller2004	Relationships among bone mineral density, body composition, and isokinetic strength in young women	CALCIFIED TISSUE INTERNATIONAL	74	3		229--235	2004																The purpose of this study was to examine the relationships among bone mineral density (BMD), body composition, and isokinetic strength in young women. Subjects were 76 women (age: 20 +/- 2 yr, height: 164 +/- 6 cm, weight: 57 +/- 6 kg, body fat: 27 +/- 4%) with a normal body mass index (18-25 kg/m(2)). Total body, nondominant proximal femur, and nondominant distal forearm BMD were measured with d…
Mulligan2004	Isokinetic profile of shoulder internal and external rotators of high school aged baseball pitchers	JOURNAL OF STRENGTH AND CONDITIONING RESEARCH	18	4		861--866	2004																The purpose of this descriptive study was to determine whether bilateral differences exist in concentric and eccentric shoulder internal and external rotation strength in high school aged baseball pitchers. Thirty-nine high school aged baseball pitchers were bilaterally tested for concentric and eccentric internal and external rotation muscle performance on a Kin-Com 500-H isokinetic dynamometer …
Navalta2004	Physiological responses to downhill walking in older and younger individuals	Journal of Exercise Physiology Online	7	6		45--51	2004	Department of Health and Kinesiology, Purdue University, West Lafayette, IN 47907-2046, United States		https://www.scopus.com/inward/record.uri?eid=2-s2.0-14644406282&partnerID=40&md5=01e434eab30f01d9f232a20d9b4d29e2												Cited By :23 Export Date: 12 October 2021	The purpose of this study was to measure selected cardiovascular and metabolic responses in healthy older and younger individuals during downhill walking. Twenty subjects, ten older [age 64Â±3 yr (meanÂ±SD)] and ten younger (age 23Â±3 yr) performed 6 min treadmill walking bouts at 80.4 m/min at grades of 5, 0, -5, -10, -15, and -20%. Heart rate (HR), systolic (SBP) and diastolic (DBP) blood press…		Age,Curvilinear response,Eccentric exercise,Negative grade
Nelson2004	Inadequate carbohydrate intake following prolonged exercise does not increase muscle soreness after 15 minutes of downhill running	INTERNATIONAL JOURNAL OF SPORT NUTRITION AND EXERCISE METABOLISM	14	2		171--184	2004																In Delayed Onset Muscle Soreness (DOMS), muscles become sore 24 to 48 hours after eccentric and unaccustomed activity. Fiber stiffness, due to decreased muscle glycogen, may predispose muscle to greater damage during eccentric exercise. This study sought to determine if inadequate carbohydrate intake following a protocol to decrease muscle glycogen would increase DOMS after 15 min of downhill run…
Nelson2004a	Eccentric Training and Static Stretching Improve Hamstring Flexibility of High School Males.	Journal of athletic training	39	3	sep	254--258	2004									National Athletic Trainers Association							OBJECTIVE: To determine if the flexibility of high-school-aged males would improve after a 6-week eccentric exercise program. In addition, the changes in hamstring flexibility that occurred after the eccentric program were compared with a 6-week program of static stretching and with a control group (no stretching). DESIGN AND SETTING: We used a test-retest control group design in a laboratory set…
Ohberg2004	Eccentric training in patients with chronic Achilles tendinosis: normalised tendon structure and decreased thickness at follow up.	British journal of sports medicine	38	1	feb	8--11; discussion 11	2004																OBJECTIVE: To prospectively investigate tendon thickness and tendon structure by ultrasonography in patients treated with eccentric calf muscle training for painful chronic Achilles tendinosis located at the 2-6 cm level in the tendon. METHODS: The patients were examined with grey scale ultrasonography before and 3.8 years (mean) after the 12 week eccentric training regimen. At follow up, a quest…		Achilles Tendon,Adult,Aged,Chronic Disease,Exercise Therapy,Female,Follow-Up Studies,Humans,Male,Middle Aged,Muscle, Skeletal,Patient Satisfaction,Prospective Studies,Sports,Tendinopathy,Treatment Outcome,Ultrasonography,diagnostic imaging,methods,pathology,physiopathology,rehabilitation,ultrastructure
Ohberg2004a	Effects on neovascularisation behind the good results with eccentric training in chronic mid-portion Achilles tendinosis?	Knee surgery, sports traumatology, arthroscopy : official journal of the ESSKA	12	5	sep	465--470	2004																The background to the good clinical results reported using painful eccentric calf-muscle training as treatment for chronic painful mid-portion Achilles tendinosis is not known. Recently, using ultrasound and colour Doppler technique, we showed that painful tendinosis was associated with a local neovascularisation. Furthermore, in a pilot study, destroying these neovessels by sclerosing therapy cu…		Achilles Tendon,Adult,Aged,Exercise Therapy,Female,Humans,Male,Middle Aged,Neovascularization, Pathologic,Tendinopathy,Treatment Outcome,Ultrasonography, Doppler, Color,blood supply,diagnostic imaging,methods,therapy
Pedersen2004	Does the aging skeletal muscle maintain its endocrine function?	EXERCISE IMMUNOLOGY REVIEW	10			42--55	2004																Contracting skeletal muscles produce and release the cytokine interleukin (IL)-6 and this release is augmented by the presence of low muscle glycogen. Since muscle metabolism in elderly subjects relies on glycogen more than younger subjects, it is possible that aging is associated with an altered production of muscle-derived IL-6 during exercise. To test the relation between aging and muscle-deri…
Pham-Thanh2004	The art of Wildean paradox: Transgressoin, subversion or inversion?	CAHIERS VICTORIENS & EDOUARDIENS		59		191--200	2004																Oscar Wilde's works can be seen as paradoxical since they confront the ideology of his age. As an iconoclast, he exposes truisms, commonplaces and prejudices, which he examines from a decentered, possibly eccentric perspective. The correctness of his propositions is based on the pertinence/validity of his arguments and on the organisation of his discourse. Then, as an Irish exile, he proves trans…
Purdam2004	A pilot study of the eccentric decline squat in the management of painful chronic patellar tendinopathy	BRITISH JOURNAL OF SPORTS MEDICINE	38	4		395--397	2004																Objectives: This non-randomised pilot study investigated the effect of eccentric quadriceps training on 17 patients ( 22 tendons) with painful chronic patellar tendinopathy. Methods: Two different eccentric exercise regimens were used by subjects with a long duration of pain with activity ( more than six months). ( a) Nine consecutive patients ( 10 tendons; eight men, one woman; mean age 22 years…
Richardson2004	Reduced mechanical efficiency in chronic obstructive pulmonary disease but normal peak VO2 with small muscle mass exercise.	American journal of respiratory and critical care medicine	169	1	jan	89--96	2004																We studied six patients with chronic obstructive pulmonary disease (COPD) (FEV1 = 1.1 +/- 0.2 L, 32% of predicted) and six age- and activity level-matched control subjects while performing both maximal bicycle exercise and single leg knee-extensor exercise. Arterial and femoral venous blood sampling, thermodilution blood flow measurements, and needle biopsies allowed the assessment of muscle oxyg…		Aged,Blood Gas Analysis,Case-Control Studies,Exercise Test,Exercise Tolerance,Female,Humans,Male,Middle Aged,Muscle, Skeletal,Oxygen Consumption,Probability,Pulmonary Disease, Chronic Obstructive,Pulmonary Gas Exchange,Reference Values,Respiratory Function Tests,Sampling Studies,Sensitivity and Specificity,Severity of Illness Index,diagnosis,methods,pathology,physiology
Robinson2004	The effects of land vs. aquatic plyometrics on power, torque, velocity, and muscle soreness in women	JOURNAL OF STRENGTH AND CONDITIONING RESEARCH	18	1		84--91	2004																Robinson, L.E., S.T. Devor, M.A. Merrick, and J. Buckworth. The effects of land vs. aquatic plyometrics on power, torque, velocity, and muscle soreness in women. J. Strength Cond. Res. 18(1):84-91. 2004. - The purpose of this study was to compare changes in performance indicators (power, torque, and velocity) and muscle soreness between plyometric training on land and in water. Thirty-two college…
Roos2004	Mikael; Lagerquist	Annika; S{\"{o}}derberg	Bengt"	Clinical improvement after 6 weeks of eccentric exercise in patients with mid-portion Achilles tendinopathy -- a randomized trial with 1-year follow-up.	Scandinavian journal of medicine & science in sports	14	5	oct	286--295	2004																Achilles tendinopathy is common and treatment with eccentric exercises seems promising. We designed a prospective randomized clinical trial to test the hypothesis that eccentric calf muscle exercises reduce pain and improve function in patients with Achilles tendinopathy. Forty-four patients were recruited from primary care (mean age: 45 years; 23 women; 65% active in sports) and randomized to th…
Schroeder2004	Musculoskeletal adaptations to 16 weeks of eccentric progressive resistance training in young women	JOURNAL OF STRENGTH AND CONDITIONING RESEARCH	18	2		227--235	2004																We investigated the musculoskeletal adaptations and efficacy of a whole-body eccentric progressive resistance-training (PRT) protocol in young women. Subjects (n = 37; mean age, 24.3) were randomly assigned to one of 3 groups: high-intensity eccentric PRT (HRT), low-intensity eccentric PRT (LRT), or control. Subjects performed 3 sets of 6 repetitions at 125% intensity or 3 sets of 10 repetitions …
Seiple2004	Multidimensional visual field maps: relationships among local psychophysical and local electrophysiological measures.	Journal of rehabilitation research and development	41	3A	may	359--372	2004																Multidimensional psychophysical and electrophysical maps of the central retina are essential for assessing the functioning of the diseased retina. In this study, grating acuity, contrast sensitivity, duration for letter identification, multifocal electroretinograms, and Humphrey visual field thresholds were measured at equivalent positions throughout the central 20 degrees. We found that the rate…		Adult,Cornea,Electroretinography,Female,Humans,Male,Middle Aged,Optics and Photonics,Retina,Sensory Thresholds,Visual Acuity,Visual Field Tests,Visual Fields,Visual Perception,physiology
Shalabi2004	Tendon injury and repair after core biopsies in chronic Achilles tendinosis evaluated by serial magnetic resonance imaging.	British journal of sports medicine	38	5	oct	606--612	2004																OBJECTIVE: To evaluate the morphological response and healing process after transverse ultrasound guided core biopsies in chronic Achilles tendinosis using serial magnetic resonance imaging (MRI) over a period of one year. METHODS: The study included 10 patients. Six had five transverse core biopsies and were longitudinally evaluated by MRI before the biopsies and then after one week, three month…	tendon volume and mean signal intensity gradually decreased. One year after the biopsy	the tendon volume had decreased by 20% and the intratendinous signal by 28% compared with the index MRI (p = 0.04). The untreated patients showed an increase in both tendon volume (39%	p = 0.06) and intratendinous signal (37%	p = 0.14) at the one year follow up. After one year
Shalabi2004a	Immediate Achilles tendon response after strength training evaluated by MRI.	Medicine and science in sports and exercise	36	11	nov	1841--1846	2004																PURPOSE: To evaluate the tendon response after acute strength training in chronic Achilles tendinosis using magnetic resonance imaging (MRI). METHODS: Twenty-two patients (44 Achilles tendons, 15 males, 8 patients with bilateral symptoms) with a median age of 45 yr (range 28-57 yr) were included in the study. In all patients, both Achilles tendons were examined with MRI before and immediately aft…		Achilles Tendon,Adaptation, Physiological,Adult,Female,Humans,Magnetic Resonance Imaging,Male,Middle Aged,Muscle, Skeletal,Organ Size,Tendinopathy,Weight Lifting,diagnosis,pathology,physiopathology,rehabilitation
Shalabi2004b	Eccentric training of the gastrocnemius-soleus complex in chronic Achilles tendinopathy results in decreased tendon volume and intratendinous signal as evaluated by MRI.	The American journal of sports medicine	32	5		1286--1296	2004																BACKGROUND: Satisfactory treatment results have been reported after eccentric calf muscle strength training in patients with chronic Achilles tendinopathy. HYPOTHESIS: Magnetic resonance imaging may be a useful adjunct in the evaluation of the effect of 3 months of eccentric calf muscle strength training. STUDY DESIGN: Prospective cohort study. METHODS: Using magnetic resonance imaging, the Achil…		Achilles Tendon,Adult,Aged,Chronic Disease,Contrast Media,Female,Gadolinium DTPA,Humans,Magnetic Resonance Imaging,Male,Middle Aged,Muscle, Skeletal,Patient Satisfaction,Physical Therapy Modalities,Prospective Studies,Tendinopathy,Treatment Outcome,pathology,physiology,physiopathology,therapy
Steiner2004	Eccentric endurance training in subjects with coronary artery disease: a novel exercise paradigm in cardiac rehabilitation?	European journal of applied physiology	91	5-6	may	572--578	2004																This study evaluated the effects of 8 weeks of eccentric endurance training (EET) in male subjects (age range 42-66 years) with coronary artery disease (CAD). EET was compared to concentric endurance training (CET) carried out at the same metabolic exercise intensity, three times per week for half an hour. CET ( n=6) was done on a conventional cycle ergometer and EET ( n=6) on a custom-built moto…		Coronary Artery Disease,Exercise Therapy,Humans,Leg,Male,Middle Aged,Muscle Contraction,Muscle, Skeletal,Physical Education and Training,Physical Endurance,Physical Exertion,Treatment Outcome,methods,pathology,physiopathology,rehabilitation
Symons2004	Effects of deep heat as a preventative mechanism on delayed onset muscle soreness	JOURNAL OF STRENGTH AND CONDITIONING RESEARCH	18	1		155--161	2004																Symons, T.B., J.L. Clasey, D.R. Gater, and J.W. Yates. Effects of deep heat as a preventative mechanism on delayed onset muscle soreness. J. Strength Cond. Res. 18(1):155161. 2004-The effects of increased muscle temperature via continuous ultrasound prior to a maximal bout of eccentric exercise were investigated on the symptoms of delayed onset muscle soreness (DOMS) of the elbow flexors. Perceiv…
Tesch2004	Muscle hypertrophy following 5-week resistance training using a non-gravity-dependent exercise system.	Acta physiologica Scandinavica	180	1	jan	89--98	2004																AIM: The efficacy of a mechanical, gravity-independent resistance exercise (RE) system to induce strength gains and muscle hypertrophy was validated. Designed for space crew in orbit, this technique offers resistance during coupled concentric and eccentric actions by utilizing the inertia of a rotating flywheel(s), set in motion by the trainee. METHODS: Ten middle-aged (30-53 years) men and women…		Adult,Electromyography,Equipment Design,Exercise,Female,Humans,Hypertrophy,Isometric Contraction,Leg,Magnetic Resonance Imaging,Male,Middle Aged,Muscle, Skeletal,methods,pathology,physiology
Tesch2004a	Hypertrophy of chronically unloaded muscle subjected to resistance exercise.	Journal of applied physiology (Bethesda, Md. : 1985)	96	4	apr	1451--1458	2004																In an effort to simulate the compromised function and atrophy of lower limb muscles experienced by astronauts after spaceflight, 21 men and women age 30-56 yr were subjected to unilateral lower limb unloading for 5 wk. Whereas 10 of these subjects performed unilateral knee extensor resistance exercise (ULRE) two or three times weekly, 11 subjects (UL) refrained from training. The exercise regimen…		Adult,Body Temperature,Crutches,Electromyography,Female,Humans,Hypertrophy,Knee,Leg,Magnetic Resonance Imaging,Male,Middle Aged,Muscle Contraction,Muscle, Skeletal,Muscular Atrophy,Space Flight,Time Factors,Weight Lifting,Weight-Bearing,pathology,physiology,prevention & control
Toumi2004	Effects of eccentric phase velocity of plyometric training on the vertical jump	INTERNATIONAL JOURNAL OF SPORTS MEDICINE	25	5		391--398	2004																The aim of this study was to compare the effects of plyometric training performed with rapid or slow stretch contraction on jump performance and muscle properties. Thirty males between the ages of 19 and 22 volunteered for the 8-week experiment. Subjects were divided into the following three groups: training group 1 (TG1), training group 2 (TG2), and control group (CG). Each of the two experiment…
Umeda2004	Adverse effects of energy restriction on myogenic enzymes in judoists	JOURNAL OF SPORTS SCIENCES	22	4		329--338	2004																In this study, we examined the effects of weight reduction by restricting energy intake on muscle function and serum concentrations of myogenic enzymes in judoists. Twenty-seven male judoists aged 19.3+/-0.6 years (mean+/- s ) were divided into three groups based on the extent of body weight reduction: high weight reduction (height 1.70+/-0.05 m, body mass 78.5 +/-13.6 kg), low weight reduction (…
Valour2004	Effects of eccentric training on torque-angular velocity-power characteristics of elbow flexor muscles in older women.	Experimental gerontology	39	3	mar	359--368	2004																The purpose of this study was to investigate the potential of eccentric training to improve elbow flexor muscle power in elderly subjects. Fourteen older female volunteers (age range 60-78 years) were randomly assigned into either a training group (TG) or a control group (CG). For the TG, the 21-session 7-week eccentric training program consisted of 5x6 eccentric muscle actions at 60-100% of conc…		Aged,Elbow Joint,Electromyography,Female,Humans,Isometric Contraction,Middle Aged,Muscle, Skeletal,Physical Education and Training,Torque,methods,physiology
Walsh2004	Human forearm position sense after fatigue of elbow flexor muscles.	The Journal of physiology	558	Pt 2	jul	705--715	2004																After a period of eccentric exercise of elbow flexor muscles of one arm in young, adult human subjects, muscles became fatigued and damaged. Damage indicators were a fall in force, change in resting elbow angle and delayed onset of soreness. After the exercise, subjects were asked to match the forearm angle of one arm, whose position was set by the experimenter, with their other arm. Subjects mat…		Adult,Elbow Joint,Exercise,Female,Forearm,Gravity Sensing,Humans,Male,Middle Aged,Muscle Fatigue,Muscle Spindles,Muscle, Skeletal,Proprioception,physiology
Watanabe2004	Dieter; Matsumoto	Toshio; Nakamura	Toshitaka"	Intravenous pamidronate prevents femoral bone loss and renal stone formation during 90-day bed rest.	Journal of bone and mineral research : the official journal of the American Society for Bone and Mineral Research	19	11	nov	1771--1778	2004																Long-term bed rest has potential risks of bone loss and renal stone formation. We examined the effects of resistive exercise and intravenous pamidronate on BMD, bone turnover, urinary calcium, and renal stone formation in 25 healthy males during 90-day bed rest. Pamidronate prevented femoral bone loss and renal stone formation, but resistive exercise showed little effects. INTRODUCTION: Long-term…
Wu2004	Spatial, temporal and muscle action patterns of Tai Chi gait	JOURNAL OF ELECTROMYOGRAPHY AND KINESIOLOGY	14	3		343--354	2004																This study was to quantitatively characterize the spatial, temporal, and neuromuscular activation patterns of Tai Chi gait (TCG). Ten healthy young subjects were tested. The kinematics of TCG and normal gait (NG) were measured using a marker-based motion analysis system and two biomechanical force plates. Surface electromyography (EMG) was recorded from six left-side muscles: tibialis anterior, s…
Andersen2005	Neuromuscular adaptations to detraining following resistance training in previously untrained subjects	EUROPEAN JOURNAL OF APPLIED PHYSIOLOGY	93	5-6		511--518	2005																Resistance training has been shown to considerably increase strength and neural drive during maximal eccentric muscle contraction; however, less is known about the adaptive change induced by subsequent detraining. The purpose of the study was to examine the effect of dynamic resistance training followed by detraining on changes in maximal eccentric and concentric isokinetic muscle strength, as we…
Bassa2005	Activation of antagonist knee muscles during isokinetic efforts in prepubertal and adult males	PEDIATRIC EXERCISE SCIENCE	17	2		171--181	2005																The deficit of muscle-force production observed in children can be partly attributed to neural factors, such as an increased level of coactivation. This hypothesis, however, has not been thoroughly investigated under concentric and eccentric isokinetic conditions at different angular velocities. Thus, the purpose of this study was to examine whether prepubescent children present higher levels of …
Basta2005	Postural control in otolith disorders.	Human movement science	24	2	apr	268--279	2005																It was the aim of the present paper to investigate the influence of otolith disorders on human postural control by different methods. The 33 patients of our study had undergone a minor head injury and suffered subsequently from an utricular or sacculo-utricular disorder as evidenced by vestibular evoked myogenic potential recordings and eccentric rotation recordings of the otolith-ocular response…		Adult,Craniocerebral Trauma,Female,Humans,Kinesthesis,Male,Meniere Disease,Middle Aged,Orientation,Otolithic Membrane,Postural Balance,Proprioception,Reference Values,Reflex, Vestibulo-Ocular,Retrospective Studies,Saccule and Utricle,Vestibular Function Tests,Walking,physiology,physiopathology
Beck2005	The effects of interelectrode distance on electromyographic amplitude and mean power frequency during isokinetic and isometric muscle actions of the biceps brachii	JOURNAL OF ELECTROMYOGRAPHY AND KINESIOLOGY	15	5		482--495	2005																The purpose of this study was to examine the effects of interelectrode distance (IED) on the absolute and normalized electromyographic (EMG) amplitude and mean power frequency (MPF) versus isokinetic and isometric torque relationships for the biceps brachii muscle. Ten adults [mean +/- SD age = 22.0 +/- 3.4 years] performed submaximal to maximal, isokinetic and isometric muscle actions of the dom…
Bemben2005	Creatine supplementation and exercise performance - Recent findings	SPORTS MEDICINE	35	2		107--125	2005																Creatine monchydrate (Cr) is perhaps one of the most widely used supplements taken in an attempt to improve athletic performance. The aim of this review is to update, summarise and evaluate the findings associated with Cr ingestion and sport and exercise performance with the most recent research available. Because of the large volume of scientific literature dealing with Cr supplementation and th…
Bidne2005	Effect Of Warm-up On DOMs And ROM Following Eccentric Exercise In Older Adults	MEDICINE AND SCIENCE IN SPORTS AND EXERCISE	37 MA - 1			S315--S315	2005
Blazevich2005	Understanding muscle architectural adaptation: Macro- and micro-level research	CELLS TISSUES ORGANS	181	1		1--10	2005																Recent research using muscle-imaging techniques has revealed a remarkable plasticity of human muscle architecture where significant changes in fascicle lengths and angles have resulted from the chronic performance, or cessation, of strong muscle contractions. However, there is a paucity of data describing architectural adaptations to chronic stretching, disuse and immobilization, illness, and agi…
Bloomer2005	Astaxanthin supplementation does not attenuate muscle injury following eccentric exercise in resistance-trained men	INTERNATIONAL JOURNAL OF SPORT NUTRITION AND EXERCISE METABOLISM	15	4		401--412	2005																This investigation was designed to determine the effects of astaxanthin on markers of skeletal muscle injury. Twenty resistance trained men (mean +/- standard error of the mean: age, 25.1 +/- 1.6 y; height, 1.79 +/- 0.02 m; weight, 86.8 +/- 4.4 kg) were assigned to either a placebo (1732 mg safflower oil, n = 10) or astaxanthin (BioAstin; 1732 mg safflower oil; haematococcus algae extract [contai…
Buhl2005	Changes over time in echocardiographic measurements in young Standardbred racehorses undergoing training and racing and association with racing performance	JAVMA-JOURNAL OF THE AMERICAN VETERINARY MEDICAL ASSOCIATION	226	11		1881--1887	2005																Objective-To evaluate changes over time in echocardiographic measurements in young Standardbred racehorses undergoing training and racing and determine whether there was any relationship between cardiac dimensions and racing performance. Design-Longitudinal observational study Animals-103 horses. Procedure-2-dimensional and M-mode echocardiography was performed 4 times at 6-month intervals. Resul…
Chen2005	Damping of polymer composite materials for flywheel applications	POLYMER COMPOSITES	26	4		498--508	2005																Damping of pure resin and T700/epoxy composite lamina in longitudinal and transverse directions were investigated experimentally and analytically. The effect of aging on damping was also studied by placing samples at 60 degrees C in an oven for extended periods of time and using results from time-dependant studies. Damping master curves vs. frequency were constructed from individual curves at var…
Clarkson2005	ACTN3 genotype is associated with increases in muscle strength in response to resistance training in women	JOURNAL OF APPLIED PHYSIOLOGY	99	1		154--163	2005																The alpha-actinin 3 (ACTN3) gene encodes a protein of the Z disk of myofibers, and a polymorphism of ACTN3 results in complete loss of the protein. The ACTN3 genotype (R577X) has been found to be associated with performance in Australian elite athletes ( Yang N, MacArthur DG, Gulbin JP, Hahn AG, Beggs AH, Easteal S, and North K. Am J Hum Genet 73: 627 - 631, 2003). We studied associations between…
Close2005	Skeletal muscle damage with exercise and aging	SPORTS MEDICINE	35	5		413--427	2005																Skeletal muscle comprises the largest organ system in the human body and is essential for force generation and movement. Skeletal muscle is subjected to considerable stresses during everyday use. However, muscle has the unique ability to adapt and remodel to provide protection against such stresses. This adaptation occurs at the structural through to the cellular level, which includes changes in …
Cohen2005	Adolescent Cluster A personality disorder symptoms, role assumption in the transition to adulthood, and resolution or persistence of symptoms.	Development and psychopathology	17	2		549--568	2005																Cluster A odd or eccentric personality disorder (PD) symptoms may reflect a schizophrenia spectrum biological vulnerability in at least some persons. Consequently, this symptom pattern may have particularly negative effects on the transition from adolescent to adult roles. A general population sample of 200 young adults was assessed on Cluster A PD at mean ages 17 and 22, and subsequently provide…		Adolescent,Adolescent Development,Adult,Aging,Humans,Interviews as Topic,Personality Disorders,Psychology, Adolescent,Type A Personality,psychology
Crepaz2005	Factors affecting left ventricular remodelling and mechanics in the long-term follow-up after successful repair of aortic coarctation	CARDIOLOGY IN THE YOUNG	15	2		160--167	2005																Aims: To identify factors predisposing to abnormal left ventricular geometry and mechanics in 52 patients after successful repair of aortic coarctation. Methods and results: We evaluated left ventricular remodelling, systolic midwall mechanics, and isthmic gradient by echo-Doppler, systemic blood pressure at rest/exercise and by ambulatory blood pressure monitoring, and the aortic arch by magneti…
DeVos2005	Optimal load for increasing muscle power during explosive resistance training in older adults.	The journals of gerontology. Series A, Biological sciences and medical sciences	60	5	may	638--647	2005																BACKGROUND: Muscle power (force x velocity) recedes at a faster rate than strength with age and may also be a stronger predictor of fall risk and functional decline. The optimal training paradigm for improving muscle power in older adults is not known, although some literature suggests high velocity, low load training is optimal in young adults. METHODS: One hundred twelve healthy older adults (6…		Age Factors,Aged,Analysis of Variance,Exercise,Female,Humans,Linear Models,Male,Middle Aged,Multivariate Analysis,Muscle, Skeletal,Physical Education and Training,Physical Endurance,Probability,Reference Values,Risk Assessment,Sensitivity and Specificity,Sex Factors,Stress, Mechanical,Weight Lifting,Weight-Bearing,methods,physiology
DiFabio2005	Influence of elderly executive cognitive function on attention in the lower visual field during step initiation.	Gerontology	51	2		94--107	2005																BACKGROUND: There is a well-established relationship between poor executive cognitive abilities and elderly fall risk, but the precise mechanism underlying this relationship is unknown. Older persons frequently fall or trip on objects below eye level, and it was hypothesized that the pathological mechanism linking low executive function and fall risk is a selective impairment in the resolution of…		Accidental Falls,Adult,Age Factors,Aged,Aged, 80 and over,Aging,Attention,Cognition Disorders,Decision Making,Female,Humans,Male,Problem Solving,Saccades,Time Factors,Vision Disorders,Visual Fields,Visual Perception,Walking,complications,physiology,physiopathology
Dore2005	Gender differences in peak muscle performance during growth	INTERNATIONAL JOURNAL OF SPORTS MEDICINE	26	4	may	274--280	2005																Gender-related differences in maximal leg muscle power were examined in 496 females and 426 males aged 8 to 20 years. Cycling peak power (CPP, including the force required to accelerate the flywheel of the cycle ergometer) was measured during three sprints. Optimal velocity (Vopt, velocity at CPP) was also determined. No gender-differences were observed in anthropometric characteristics and cycli…		,Adolescent,Adult,Age Factors,Body Size,Child,Exercise,Exercise Test,Female,Growth,Humans,Male,Motor Activity,Muscle,Regression Analysis,Sex Factors,Skeletal,Task Performance and Analysis,physiology
Gajdosik2005	Passive elastic properties of the calf muscle-tendon unit of distance runners	ISOKINETICS AND EXERCISE SCIENCE	13	3		207--216	2005																Studies have suggested that distance runners have decreased calf muscle-tendon unit (MTU) flexibility, which is related to improved running economy. This study examined the passive elastic properties of the calf MTU of distance runners to test the hypothesis that they have increased passive elastic properties measured in vivo. Ten distance runners (aged 18-21 years) and 10 untrained men (aged 23-…
Giorgi2005	An instrument for biofeedback applied to vision	APPLIED PSYCHOPHYSIOLOGY AND BIOFEEDBACK	30	4		389--395	2005																One hundred and ten patients (179 eyes) with reduced visual acuity caused by different ocular disorders underwent visual rehabilitation with an instrument for biofeedback: improved biofeedback integrated system (Ibis). One hundred and fourteen eyes had age-related macular degeneration, 39 eyes had myopic macular degeneration, and 26 eyes were affected by different ocular disorders. A placebo trai…
Goldfarb2005	Combined antioxidant treatment effects on blood oxidative stress after eccentric exercise.	Medicine and science in sports and exercise	37	2	feb	234--239	2005																PURPOSE: This study was designed to ascertain the effects of a combination antioxidant therapy on plasma protein carbonyls (PC), malondialdehyde (MDA), and whole blood total (TGSH), oxidized (GSSG), and reduced (GSH) glutathione in non-resistance trained females after eccentric resistance exercise. METHODS: Eighteen women (aged 19-31 yr) were randomized in a double-blind manner to either an antio…		Adult,Antioxidants,Ascorbic Acid,Biomarkers,Double-Blind Method,Drug Therapy, Combination,Exercise,Female,Glutathione,Glutathione Disulfide,Humans,Malondialdehyde,Oxidative Stress,Protein Carbonylation,Selenium,Treatment Outcome,Vitamin E,Women's Health,administration & dosage,blood,drug effects,pharmacology
Gomez2005	The impact of seatback angle on electromyographical activity of the lower back and quadriceps muscles during bilateral knee extension	JOURNAL OF STRENGTH AND CONDITIONING RESEARCH	19	4		908--917	2005																Gomez, T.R., F. Ma, J.B. Adams, M. Stoutenberg, and J.F. Signorile. The impact of seatback angle on electromy-ographical activity of the lower back and quadriceps muscles during bilateral knee extension. J. Strength Cond. Res. 19(4).908-917. 2005.-This study investigated variations in electromyographic (EMG) responses of the erector spinae (ES), vastus medialis (VM), rectus femoris (RF), and vast…
Haddad2005	Pretranslational markers of contractile protein expression in human skeletal muscle: effect of limb unloading plus resistance exercise.	Journal of applied physiology (Bethesda, Md. : 1985)	98	1	jan	46--52	2005																Previously, it has been shown that the human ground-based model consisting of unilateral limb suspension (ULLS) induces atrophy and reduced strength of the affected quadriceps muscle group. Resistance exercise (RE) involving concentric-eccentric actions, in the face of ULLS, is effective in ameliorating these deficits. The goal of the present study was to determine whether alterations in contract…		Adult,Biomarkers,Exercise,Female,Gene Expression Regulation,Hindlimb Suspension,Humans,Lower Extremity,Male,Middle Aged,Muscle Contraction,Muscle Proteins,Muscle, Skeletal,Physical Exertion,Protein Modification, Translational,Weight-Bearing,metabolism,methods,physiology
Hale2005	Etiology of patellar tendinopathy in athletes	JOURNAL OF SPORT REHABILITATION	14	3		258--272	2005																Objective: To review the etiology of patellar tendinopathy as it relates to clinical management of chronic patellar-tendon disease in athletes. Data Sources: Information was gathered from a MEDLINE search of literature in English using the key words patellar tendinitis, patellar tendonitis, patellar tendinosis, patellar tendinopathy, and jumper's knee. Study Selection: All relevant peer-reviewed …
Hamada2005	Senescence of human skeletal muscle impairs the local inflammatory cytokine response to acute eccentric exercise.	FASEB journal : official publication of the Federation of American Societies for Experimental Biology	19	2	feb	264--266	2005																The impact of aging on the cytokine response of human skeletal muscle to exercise-induced injury remains poorly understood. We enrolled physically active, young (23-35 years old, n=15) and old (66-78 years old, n=15) men to perform 45 min of downhill running (16% descent) at 75% VO2max. Biopsies of vastus lateralis were obtained 24 h before and 72 h after acute eccentric exercise. Transcripts for…		Adult,Age Factors,Aged,Aging,Biomarkers,Biopsy,C-Reactive Protein,CD18 Antigens,Cytokines,DNA, Complementary,Exercise,Humans,Inflammation,Leg,Male,Muscle, Skeletal,Running,blood,chemistry,metabolism,pathology,physiology,urine
Harris-Love2005	Safety and efficacy of submaximal eccentric strength training for a subject with polymyositis.	Arthritis and rheumatism	53	3	jun	471--474	2005																		Exercise Therapy,Humans,Male,Middle Aged,Polymyositis,methods,therapy
Hart2005	Effects of sport massage on limb girth and discomfort associated with eccentric exercise.	Journal of athletic training	40	3		181--185	2005																CONTEXT: Sport massage is often used to help prepare for exercise, expedite recovery from muscle soreness, and enhance athletic performance. However, the effect of sport massage on recovery from delayed-onset muscle soreness is unknown. OBJECTIVE: To determine the effect of a short sport massage treatment on intramuscular swelling and pain in response to eccentric exercise. DESIGN: We used a 2 x …
Hassan2005	Fixation stability on central and eccentric targets in patients with age-related maculopathy pre and post eccentric viewing training	INVESTIGATIVE OPHTHALMOLOGY & VISUAL SCIENCE	46 MA - 4	Meeting of the Association-for-Research-in-Vision-and-Ophthalmology (ARVO 2005)			2005
Jamurtas2005	Comparison between leg and arm eccentric exercises of the same relative intensity on indices of muscle damage	EUROPEAN JOURNAL OF APPLIED PHYSIOLOGY	95	2-3		179--185	2005																Many exercise models have demonstrated associations between eccentric muscle actions and muscle damage. However, the magnitude of muscle damage varies among the models. It appears that responses to eccentric exercise are different between leg and arm muscles but this has not been systematically clarified. This study compared leg and arm eccentric exercises of the same relative intensity for indic…
Jonsson2005	Superior results with eccentric compared to concentric quadriceps training in patients with jumper's knee: a prospective randomised study	BRITISH JOURNAL OF SPORTS MEDICINE	39	11		847--850	2005																Background: A recent study reported promising clinical results using eccentric quadriceps training on a decline board to treat jumper's knee ( patellar tendinosis). Methods: In this prospective study, athletes ( mean age 25 years) with jumper's knee were randomised to treatment with either painful eccentric or painful concentric quadriceps training on a decline board. Fifteen exercises were repea…
Liu2005	Adeno-associated virus-mediated microdystrophin expression protects young mdx muscle from contraction-induced injury	MOLECULAR THERAPY	11	2		245--256	2005																Duchenne muscular dystrophy (DMD) is the most common inherited lethal muscle degenerative disease. Currently there is no cure. Highly abbreviated microdystrophin cDNAs were developed recently for adeno-associated virus (AAV)-mediated DMD gene therapy. Among these, a C-terminal-truncated Delta R4-R23/Delta C microgene (Delta R4/Delta C) has been considered as a very promising therapeutic candidate…
[truncated: 1,956 more rows]

## Sheet: 02_PapersStage2
Identifier	Author	Title	ABSTRACT	Journal	Volume	Number	Month	Pages	Year	Address	Note	URL	Booktitle	Chapter	Edition	Series	Editor	Publisher	ReportType	Howpublished	Institution	Organizations	School	Annote	Custom2	Custom3	Custom4	Custom5
[truncated: 332 more rows]

[truncated: 2 more sheets: 03_PapersStage3, 04_ExtractedData]
